# Supplementary material for: Inventory and DNA-barcode library of ground-dwelling predatory arthropods from Krokar virgin forest, Slovenia
Source: Biodivers Data J. 2022 Mar 9;10:e77661. doi: 10.3897/BDJ.10.e77661 (PMC8927092; doi:10.3897/BDJ.10.e77661)
Supplement: Supplementary material 1 — Specimen list [file bdj-10-e77661-s001.csv]

occurrenceID	eventID	order	scientificName	sex	lifeStage	taxonRank	basisOfRecord	preparations	dateIdentified	identifiedBy	boldSequenceID	GenBankAccession
BMKR00001	KROK01	Coleoptera	Carabus creutzeri Fabricius, 1801	F	adult	species	preserved specimen	AP	2019	Urška Ratajc
BMKR00002	KROK01	Coleoptera	Pterostichus burmeisteri Heer, 1837	F	adult	species	preserved specimen	AP	2019	Urška Ratajc
BMKR00003	KROK01	Araneae	Harpactea lepida (C. L. Koch, 1838)	M	adult	species	preserved specimen	AP	2019	Žan Kuralt
BMKR00004	KROK01	Coleoptera	Pterostichus burmeisteri Heer, 1837	M	adult	species	preserved specimen	AP	2019	Urška Ratajc
BMKR00005	KROK01	Araneae	Inermocoelotes inermis (L. Koch, 1855)	M	adult	species	preserved specimen	AP	2019	Žan Kuralt
BMKR00006	KROK01	Araneae	Tenuiphantes tenebricola (Wider, 1834)	M	adult	species	preserved specimen	AP	2019	Žan Kuralt
BMKR00007	KROK02	Coleoptera	Cychrus attenuatus (Fabricius, 1792)			species	preserved specimen	AP	2019	Urška Ratajc
BMKR00008	KROK02	Coleoptera	Pterostichus burmeisteri Heer, 1837	F	adult	species	preserved specimen	AP	2019	Urška Ratajc
BMKR00009	KROK02	Araneae	Coelotes atropos (Walckenaer, 1830)	M	adult	species	preserved specimen	AP	2019	Žan Kuralt
BMKR00010	KROK02	Araneae	Inermocoelotes inermis (L. Koch, 1855)	M	adult	species	preserved specimen	AP	2019	Žan Kuralt
BMKR00011	KROK02	Araneae	Inermocoelotes inermis (L. Koch, 1855)	M	adult	species	preserved specimen	AP	2019	Žan Kuralt
BMKR00012	KROK02	Araneae	Inermocoelotes inermis (L. Koch, 1855)	M	adult	species	preserved specimen	AP	2019	Žan Kuralt
BMKR00013	KROK02	Araneae	Inermocoelotes inermis (L. Koch, 1855)	M	adult	species	preserved specimen	AP	2019	Žan Kuralt
BMKR00014	KROK02	Araneae	Inermocoelotes inermis (L. Koch, 1855)	M	adult	species	preserved specimen	AP	2019	Žan Kuralt
BMKR00015	KROK02	Araneae	Inermocoelotes inermis (L. Koch, 1855)	M	adult	species	preserved specimen	AP	2019	Žan Kuralt
BMKR00016	KROK02	Coleoptera	Abax ovalis (Duftschmid, 1812)	F	adult	species	preserved specimen	AP	2019	Urška Ratajc	KROK008-19	MT994068
BMKR00017	KROK04	Coleoptera	Cychrus attenuatus (Fabricius, 1792)			species	preserved specimen	AP	2019	Urška Ratajc
BMKR00018	KROK04	Coleoptera	Pterostichus burmeisteri Heer, 1837	F	adult	species	preserved specimen	AP	2019	Urška Ratajc
BMKR00019	KROK02	Geophilomorpha	Strigamia acuminata (Leach, 1814)	F	adult	species	preserved specimen	AP	2019	Ivan Kos
BMKR00020	KROK02	Geophilomorpha	Strigamia acuminata (Leach, 1814)	F	adult	species	preserved specimen	AP	2019	Ivan Kos
BMKR00021	KROK04	Coleoptera	Carabus creutzeri Fabricius, 1801	F	adult	species	preserved specimen	AP	2019	Urška Ratajc	KROK011-19	MT994074
BMKR00022	KROK05	Coleoptera	Pterostichus burmeisteri Heer, 1837	F	adult	species	preserved specimen	AP	2019	Urška Ratajc
BMKR00023	KROK03	Araneae	Inermocoelotes inermis (L. Koch, 1855)	M	adult	species	preserved specimen	AP	2019	Žan Kuralt
BMKR00024	KROK03	Araneae	Tenuiphantes tenebricola (Wider, 1834)	F	adult	species	preserved specimen	AP	2019	Žan Kuralt
BMKR00025	KROK04	Araneae	Coelotes atropos (Walckenaer, 1830)	M	adult	species	preserved specimen	AP	2019	Žan Kuralt
BMKR00026	KROK04	Araneae	Inermocoelotes anoplus (Kulczynski, 1897)	M	adult	species	preserved specimen	AP	2019	Žan Kuralt
BMKR00027	KROK04	Araneae	Inermocoelotes inermis (L. Koch, 1855)	M	adult	species	preserved specimen	AP	2019	Žan Kuralt
BMKR00028	KROK06	Coleoptera	Molops striolatus (Fabricius, 1801)	F	adult	species	preserved specimen	AP	2019	Urška Ratajc
BMKR00029	KROK06	Coleoptera	Molops striolatus (Fabricius, 1801)	F	adult	species	preserved specimen	AP	2019	Urška Ratajc
BMKR00030	KROK04	Araneae	Tenuiphantes tenebricola (Wider, 1834)	M	adult	species	preserved specimen	AP	2019	Žan Kuralt
BMKR00031	KROK06	Coleoptera	Pterostichus burmeisteri Heer, 1837	M	adult	species	preserved specimen	AP	2019	Urška Ratajc
BMKR00032	KROK06	Coleoptera	Pterostichus burmeisteri Heer, 1837	M	adult	species	preserved specimen	AP	2019	Urška Ratajc
BMKR00033	KROK06	Coleoptera	Pterostichus burmeisteri Heer, 1837	F	adult	species	preserved specimen	AP	2019	Urška Ratajc
BMKR00034	KROK06	Coleoptera	Pterostichus burmeisteri Heer, 1837	F	adult	species	preserved specimen	AP	2019	Urška Ratajc
BMKR00035	KROK06	Coleoptera	Pterostichus burmeisteri Heer, 1837	F	adult	species	preserved specimen	AP	2019	Urška Ratajc
BMKR00036	KROK06	Coleoptera	Pterostichus burmeisteri Heer, 1837	F	adult	species	preserved specimen	AP	2019	Urška Ratajc
BMKR00037	KROK06	Coleoptera	Pterostichus burmeisteri Heer, 1837	F	adult	species	preserved specimen	AP	2019	Urška Ratajc
BMKR00038	KROK05	Araneae	Comaroma simoni Bertkau, 1889	M	adult	species	preserved specimen	AP	2019	Žan Kuralt
BMKR00039	KROK05	Araneae	Inermocoelotes inermis (L. Koch, 1855)	M	adult	species	preserved specimen	AP	2019	Žan Kuralt
BMKR00040	KROK05	Araneae	Centrophantes roeweri (Wiehle, 1961)	F	adult	species	preserved specimen	AP	2019	Žan Kuralt
BMKR00041	KROK06	Coleoptera	Molops piceus (Panzer, 1793)	F	adult	species	preserved specimen	AP	2019	Urška Ratajc	KROK017-19	MT994126
BMKR00042	KROK06	Coleoptera	Molops piceus (Panzer, 1793)	F	adult	species	preserved specimen	AP	2019	Urška Ratajc	KROK018-19	MT994125
BMKR00043	KROK06	Araneae	Histopona luxurians (Kulczynski, 1897)	M	adult	species	preserved specimen	AP	2019	Žan Kuralt
BMKR00044	KROK06	Araneae	Inermocoelotes inermis (L. Koch, 1855)	M	adult	species	preserved specimen	AP	2019	Žan Kuralt
BMKR00045	KROK06	Araneae	Tenuiphantes tenebricola (Wider, 1834)	F	adult	species	preserved specimen	AP	2019	Žan Kuralt
BMKR00046	KROK07	Coleoptera	Halyzia sedecimguttata (Linnaeus, 1758)			species	preserved specimen	AP	2019	Urška Ratajc
BMKR00047	KROK07	Coleoptera	Cychrus attenuatus (Fabricius, 1792)			species	preserved specimen	AP	2019	Urška Ratajc
BMKR00048	KROK09	Coleoptera	Notiophilus biguttatus (Fabricius, 1779)			species	preserved specimen	AP	2019	Urška Ratajc	KROK010-19	MT994131
BMKR00049	KROK11	Coleoptera	Molops piceus (Panzer, 1793)	F	adult	species	preserved specimen	AP	2019	Urška Ratajc	KROK012-19	MT994127
BMKR00050	KROK11	Coleoptera	Trechus croaticus Dejean, 1831	M	adult	species	preserved specimen	AP	2019	Urška Ratajc	KROK013-19	MT994149
BMKR00051	KROK07	Araneae	Amaurobius obustus L. Koch, 1868	F	adult	species	preserved specimen	AP	2019	Žan Kuralt
BMKR00052	KROK07	Araneae	Centrophantes roeweri (Wiehle, 1961)	F	adult	species	preserved specimen	AP	2019	Žan Kuralt
BMKR00053	KROK07	Araneae	Microneta viaria (Blackwall, 1841)	F	adult	species	preserved specimen	AP	2019	Žan Kuralt
BMKR00054	KROK07	Araneae	Tenuiphantes tenebricola (Wider, 1834)	F	adult	species	preserved specimen	AP	2019	Žan Kuralt
BMKR00055	KROK08	Araneae	Tenuiphantes tenebricola (Wider, 1834)	F	adult	species	preserved specimen	AP	2019	Žan Kuralt
BMKR00056	KROK09	Araneae	Comaroma simoni Bertkau, 1889	F	adult	species	preserved specimen	AP	2019	Žan Kuralt
BMKR00057	KROK09	Araneae	Inermocoelotes inermis (L. Koch, 1855)	F	adult	species	preserved specimen	AP	2019	Žan Kuralt
BMKR00058	KROK09	Araneae	Microneta viaria (Blackwall, 1841)	F	adult	species	preserved specimen	AP	2019	Žan Kuralt
BMKR00059	KROK09	Araneae	Microneta viaria (Blackwall, 1841)	M	adult	species	preserved specimen	AP	2019	Žan Kuralt
BMKR00060	KROK09	Araneae	Centrophantes roeweri (Wiehle, 1961)	F	adult	species	preserved specimen	AP	2019	Žan Kuralt
BMKR00061	KROK09	Lithobiomorpha	Lithobius carinthiacus Koren, 1992	M	adult	species	preserved specimen	MP	2019	Ivan Kos
BMKR00062	KROK09	Lithobiomorpha	Lithobius latro Meinert, 1872	F	adult	species	preserved specimen	AP	2019	Ivan Kos
BMKR00063	KROK09	Scolopendromorpha	Cryptops hortensis Donovan, 1810			species	preserved specimen	MP	2019	Ivan Kos
BMKR00064	KROK09	Scolopendromorpha	Cryptops hortensis Donovan, 1810			species	preserved specimen	MP	2019	Ivan Kos
BMKR00065	KROK09	Scolopendromorpha	Cryptops hortensis Donovan, 1810			species	preserved specimen	MP	2019	Ivan Kos
BMKR00066	KROK09	Scolopendromorpha	Cryptops hortensis Donovan, 1810			species	preserved specimen	MP	2019	Ivan Kos
BMKR00067	KROK09	Scolopendromorpha	Cryptops parisi Brölemann, 1920			species	preserved specimen	MP	2019	Ivan Kos
BMKR00068	KROK09	Scolopendromorpha	Cryptops parisi Brölemann, 1920			species	preserved specimen	MP	2019	Ivan Kos
BMKR00069	KROK09	Scolopendromorpha	Cryptops parisi Brölemann, 1920			species	preserved specimen	MP	2019	Ivan Kos
BMKR00070	KROK09	Scolopendromorpha	Cryptops parisi Brölemann, 1920			species	preserved specimen	MP	2019	Ivan Kos
BMKR00071	KROK09	Scolopendromorpha	Cryptops parisi Brölemann, 1920			species	preserved specimen	MP	2019	Ivan Kos
BMKR00072	KROK09	Scolopendromorpha	Cryptops parisi Brölemann, 1920			species	preserved specimen	MP	2019	Ivan Kos
BMKR00073	KROK09	Scolopendromorpha	Cryptops parisi Brölemann, 1920			species	preserved specimen	MP	2019	Ivan Kos
BMKR00074	KROK09	Scolopendromorpha	Cryptops parisi Brölemann, 1920			species	preserved specimen	MP	2019	Ivan Kos
BMKR00075	KROK09	Scolopendromorpha	Cryptops rucneri Matic, 1967			species	preserved specimen	MP	2019	Ivan Kos
BMKR00076	KROK09	Scolopendromorpha	Cryptops rucneri Matic, 1967			species	preserved specimen	MP	2019	Ivan Kos
BMKR00077	KROK10	Araneae	Inermocoelotes inermis (L. Koch, 1855)	F	adult	species	preserved specimen	AP	2019	Žan Kuralt
BMKR00078	KROK10	Araneae	Microneta viaria (Blackwall, 1841)	F	adult	species	preserved specimen	AP	2019	Žan Kuralt
BMKR00079	KROK10	Araneae	Tenuiphantes flavipes (Blackwall, 1854)	F	adult	species	preserved specimen	AP	2019	Žan Kuralt
BMKR00080	KROK11	Araneae	Centrophantes roeweri (Wiehle, 1961)	F	adult	species	preserved specimen	AP	2019	Žan Kuralt
BMKR00081	KROK11	Araneae	Comaroma simoni Bertkau, 1889	F	adult	species	preserved specimen	AP	2019	Žan Kuralt
BMKR00082	KROK11	Araneae	Histopona luxurians (Kulczynski, 1897)	M	adult	species	preserved specimen	AP	2019	Žan Kuralt
BMKR00083	KROK14	Geophilomorpha	Clinopodes carinthiacus (Latzel,1880)	F	adult	species	preserved specimen	AP	2019	Ivan Kos	KROK025-19	MT994079
BMKR00084	KROK16	Geophilomorpha	Clinopodes carinthiacus (Latzel,1880)	F	adult	species	preserved specimen	AP	2019	Ivan Kos	KROK090-20	OL874927
BMKR00085	KROK13	Geophilomorpha	Dicellophilus carniolensis (C.L. Koch, 1847)			species	preserved specimen	AP	2019	Ivan Kos	KROK026-19	MT994089
BMKR00086	KROK13	Geophilomorpha	Dicellophilus carniolensis (C.L. Koch, 1847)			species	preserved specimen	AP	2019	Ivan Kos	KROK091-20	OL874945
BMKR00087	KROK13	Geophilomorpha	Eurygeophilus pinguis (Brölemann, 1898)	F	adult	species	preserved specimen	AP	2019	Ivan Kos
BMKR00088	KROK13	Geophilomorpha	Eurygeophilus pinguis (Brölemann, 1898)	F	adult	species	preserved specimen	AP	2019	Ivan Kos
BMKR00089	KROK11	Lithobiomorpha	Eupolybothrus grossipes (C. L. Koch, 1847)		juvenile	species	preserved specimen	AP	2019	Ivan Kos
BMKR00090	KROK11	Lithobiomorpha	Eupolybothrus grossipes (C. L. Koch, 1847)		juvenile	species	preserved specimen	AP	2019	Ivan Kos
BMKR00091	KROK14	Geophilomorpha	Eurygeophilus pinguis (Brölemann, 1898)	M	adult	species	preserved specimen	AP	2019	Ivan Kos
BMKR00092	KROK11	Lithobiomorpha	Lithobius carinthiacus Koren, 1992	F	adult	species	preserved specimen	MP	2019	Ivan Kos
BMKR00093	KROK11	Lithobiomorpha	Lithobius carinthiacus Koren, 1992	M	adult	species	preserved specimen	AP	2019	Ivan Kos
BMKR00094	KROK31	Geophilomorpha	Eurygeophilus pinguis (Brölemann, 1898)	M	adult	species	preserved specimen	AP	2019	Ivan Kos	KROK027-19	MT994101
BMKR00095	KROK13	Geophilomorpha	Geophilus alpinus Meinert, 1870			species	preserved specimen	AP	2019	Ivan Kos
BMKR00096	KROK11	Scolopendromorpha	Cryptops hortensis Donovan, 1810			species	preserved specimen	MP	2019	Ivan Kos
BMKR00097	KROK11	Scolopendromorpha	Cryptops hortensis Donovan, 1810			species	preserved specimen	MP	2019	Ivan Kos
BMKR00098	KROK11	Scolopendromorpha	Cryptops hortensis Donovan, 1810			species	preserved specimen	MP	2019	Ivan Kos
BMKR00099	KROK11	Scolopendromorpha	Cryptops hortensis Donovan, 1810			species	preserved specimen	MP	2019	Ivan Kos
BMKR00100	KROK11	Scolopendromorpha	Cryptops hortensis Donovan, 1810			species	preserved specimen	MP	2019	Ivan Kos
BMKR00101	KROK11	Scolopendromorpha	Cryptops hortensis Donovan, 1810			species	preserved specimen	MP	2019	Ivan Kos
BMKR00102	KROK11	Scolopendromorpha	Cryptops parisi Brölemann, 1920			species	preserved specimen	MP	2019	Ivan Kos
BMKR00103	KROK11	Scolopendromorpha	Cryptops parisi Brölemann, 1920			species	preserved specimen	MP	2019	Ivan Kos
BMKR00104	KROK11	Scolopendromorpha	Cryptops parisi Brölemann, 1920			species	preserved specimen	MP	2019	Ivan Kos
BMKR00105	KROK11	Scolopendromorpha	Cryptops parisi Brölemann, 1920			species	preserved specimen	MP	2019	Ivan Kos
BMKR00106	KROK11	Scolopendromorpha	Cryptops rucneri Matic, 1967			species	preserved specimen	MP	2019	Ivan Kos
BMKR00107	KROK13	Araneae	Comaroma simoni Bertkau, 1889	F	adult	species	preserved specimen	AP	2019	Žan Kuralt
BMKR00108	KROK13	Araneae	Comaroma simoni Bertkau, 1889	M	adult	species	preserved specimen	AP	2019	Žan Kuralt
BMKR00109	KROK13	Araneae	Comaroma simoni Bertkau, 1889	F	adult	species	preserved specimen	AP	2019	Žan Kuralt
BMKR00110	KROK13	Araneae	Comaroma simoni Bertkau, 1889	F	adult	species	preserved specimen	AP	2019	Žan Kuralt
BMKR00111	KROK13	Araneae	Comaroma simoni Bertkau, 1889	F	adult	species	preserved specimen	AP	2019	Žan Kuralt
BMKR00112	KROK13	Araneae	Comaroma simoni Bertkau, 1889	M	adult	species	preserved specimen	AP	2019	Žan Kuralt
BMKR00113	KROK13	Araneae	Comaroma simoni Bertkau, 1889	M	adult	species	preserved specimen	AP	2019	Žan Kuralt
BMKR00114	KROK13	Araneae	Comaroma simoni Bertkau, 1889	M	adult	species	preserved specimen	AP	2019	Žan Kuralt
BMKR00115	KROK13	Araneae	Comaroma simoni Bertkau, 1889	M	adult	species	preserved specimen	AP	2019	Žan Kuralt
BMKR00116	KROK13	Araneae	Comaroma simoni Bertkau, 1889	F	adult	species	preserved specimen	AP	2019	Žan Kuralt
BMKR00117	KROK13	Lithobiomorpha	Harpolithobius gottscheensis Verhoeff, 1937	M	adult	species	preserved specimen	AP	2019	Ivan Kos
BMKR00118	KROK13	Geophilomorpha	Schendyla armata Brölemann, 1901	M	adult	species	preserved specimen	AP	2019	Ivan Kos
BMKR00119	KROK14	Geophilomorpha	Schendyla armata Brölemann, 1901	F	adult	species	preserved specimen	AP	2019	Ivan Kos	KROK092-20	OL874972
BMKR00120	KROK16	Geophilomorpha	Schendyla armata Brölemann, 1901	M	adult	species	preserved specimen	AP	2019	Ivan Kos
BMKR00121	KROK13	Geophilomorpha	Dicellophilus carniolensis (C.L. Koch, 1847)			species	preserved specimen	AP	2019	Ivan Kos
BMKR00122	KROK13	Geophilomorpha	Dicellophilus carniolensis (C.L. Koch, 1847)			species	preserved specimen	AP	2019	Ivan Kos
BMKR00123	KROK13	Geophilomorpha	Dicellophilus carniolensis (C.L. Koch, 1847)		juvenile	species	preserved specimen	AP	2019	Ivan Kos
BMKR00124	KROK16	Geophilomorpha	Schendyla armata Brölemann, 1901	M	adult	species	preserved specimen	AP	2019	Ivan Kos
BMKR00125	KROK16	Geophilomorpha	Schendyla armata Brölemann, 1901	M	adult	species	preserved specimen	AP	2019	Ivan Kos
BMKR00126	KROK13	Geophilomorpha	Eurygeophilus pinguis (Brölemann, 1898)	F	adult	species	preserved specimen	AP	2019	Ivan Kos
BMKR00127	KROK13	Geophilomorpha	Eurygeophilus pinguis (Brölemann, 1898)	F	adult	species	preserved specimen	AP	2019	Ivan Kos
BMKR00128	KROK16	Geophilomorpha	Schendyla armata Brölemann, 1901	M	adult	species	preserved specimen	AP	2019	Ivan Kos
BMKR00129	KROK13	Geophilomorpha	Schendyla armata Brölemann, 1901	F	adult	species	preserved specimen	AP	2019	Ivan Kos
BMKR00130	KROK13	Geophilomorpha	Schendyla armata Brölemann, 1901	M	adult	species	preserved specimen	AP	2019	Ivan Kos
BMKR00131	KROK16	Geophilomorpha	Schendyla armata Brölemann, 1901	F	adult	species	preserved specimen	AP	2019	Ivan Kos
BMKR00132	KROK13	Geophilomorpha	Schendyla tyrolensis Meinert, 1870	M	adult	species	preserved specimen	AP	2019	Ivan Kos
BMKR00133	KROK13	Geophilomorpha	Schendyla tyrolensis Meinert, 1870	M	adult	species	preserved specimen	AP	2019	Ivan Kos
BMKR00134	KROK13	Geophilomorpha	Stenotaenia sorrentina Attems, 1903	M	adult	species	preserved specimen	AP	2019	Ivan Kos
BMKR00135	KROK13	Geophilomorpha	Strigamia transsilvanica Verhoeff, 1928		juvenile	species	preserved specimen	AP	2019	Ivan Kos
BMKR00136	KROK13	Geophilomorpha	Strigamia transsilvanica Verhoeff, 1928	M	adult	species	preserved specimen	AP	2019	Ivan Kos
BMKR00137	KROK13	Geophilomorpha	Strigamia transsilvanica Verhoeff, 1928		juvenile	species	preserved specimen	AP	2019	Ivan Kos
BMKR00138	KROK13	Lithobiomorpha	Lithobius carinthiacus Koren, 1992	F	adult	species	preserved specimen	AP	2019	Ivan Kos
BMKR00139	KROK13	Lithobiomorpha	Lithobius pygmaeus Latzel, 1880	M	adult	species	preserved specimen	AP	2019	Ivan Kos
BMKR00140	KROK13	Lithobiomorpha	Lithobius pygmaeus Latzel, 1880	M	adult	species	preserved specimen	AP	2019	Ivan Kos
BMKR00141	KROK13	Lithobiomorpha	Lithobius pygmaeus Latzel, 1880	M	adult	species	preserved specimen	MP	2019	Ivan Kos
BMKR00142	KROK13	Lithobiomorpha	Lithobius pygmaeus Latzel, 1880	F	adult	species	preserved specimen	MP	2019	Ivan Kos
BMKR00143	KROK13	Scolopendromorpha	Cryptops hortensis Donovan, 1810			species	preserved specimen	MP	2019	Ivan Kos
BMKR00144	KROK13	Scolopendromorpha	Cryptops hortensis Donovan, 1810			species	preserved specimen	MP	2019	Ivan Kos
BMKR00145	KROK13	Scolopendromorpha	Cryptops hortensis Donovan, 1810			species	preserved specimen	MP	2019	Ivan Kos
BMKR00146	KROK16	Geophilomorpha	Schendyla armata Brölemann, 1901	F	adult	species	preserved specimen	AP	2019	Ivan Kos
BMKR00147	KROK13	Scolopendromorpha	Cryptops parisi Brölemann, 1920			species	preserved specimen	AP	2019	Ivan Kos
BMKR00148	KROK13	Scolopendromorpha	Cryptops parisi Brölemann, 1920			species	preserved specimen	AP	2019	Ivan Kos
BMKR00149	KROK13	Scolopendromorpha	Cryptops parisi Brölemann, 1920			species	preserved specimen	AP	2019	Ivan Kos
BMKR00150	KROK13	Scolopendromorpha	Cryptops parisi Brölemann, 1920			species	preserved specimen	AP	2019	Ivan Kos
BMKR00151	KROK13	Scolopendromorpha	Cryptops parisi Brölemann, 1920			species	preserved specimen	AP	2019	Ivan Kos
BMKR00152	KROK13	Scolopendromorpha	Cryptops parisi Brölemann, 1920			species	preserved specimen	AP	2019	Ivan Kos
BMKR00153	KROK13	Scolopendromorpha	Cryptops parisi Brölemann, 1920			species	preserved specimen	MP	2019	Ivan Kos
BMKR00154	KROK13	Scolopendromorpha	Cryptops parisi Brölemann, 1920			species	preserved specimen	MP	2019	Ivan Kos
BMKR00155	KROK13	Scolopendromorpha	Cryptops parisi Brölemann, 1920			species	preserved specimen	MP	2019	Ivan Kos
BMKR00156	KROK13	Scolopendromorpha	Cryptops parisi Brölemann, 1920			species	preserved specimen	MP	2019	Ivan Kos
BMKR00157	KROK13	Scolopendromorpha	Cryptops parisi Brölemann, 1920			species	preserved specimen	MP	2019	Ivan Kos
BMKR00158	KROK13	Scolopendromorpha	Cryptops parisi Brölemann, 1920			species	preserved specimen	MP	2019	Ivan Kos
BMKR00159	KROK13	Scolopendromorpha	Cryptops parisi Brölemann, 1920			species	preserved specimen	MP	2019	Ivan Kos
BMKR00160	KROK13	Scolopendromorpha	Cryptops parisi Brölemann, 1920			species	preserved specimen	MP	2019	Ivan Kos
BMKR00161	KROK13	Scolopendromorpha	Cryptops parisi Brölemann, 1920			species	preserved specimen	MP	2019	Ivan Kos
BMKR00162	KROK13	Scolopendromorpha	Cryptops parisi Brölemann, 1920			species	preserved specimen	MP	2019	Ivan Kos
BMKR00163	KROK13	Scolopendromorpha	Cryptops parisi Brölemann, 1920			species	preserved specimen	MP	2019	Ivan Kos
BMKR00164	KROK13	Scolopendromorpha	Cryptops parisi Brölemann, 1920			species	preserved specimen	MP	2019	Ivan Kos
BMKR00165	KROK13	Scolopendromorpha	Cryptops parisi Brölemann, 1920			species	preserved specimen	AP	2019	Ivan Kos
BMKR00166	KROK13	Scolopendromorpha	Cryptops parisi Brölemann, 1920			species	preserved specimen	AP	2019	Ivan Kos
BMKR00167	KROK13	Scolopendromorpha	Cryptops parisi Brölemann, 1920			species	preserved specimen	AP	2019	Ivan Kos
BMKR00168	KROK13	Scolopendromorpha	Cryptops parisi Brölemann, 1920			species	preserved specimen	AP	2019	Ivan Kos
BMKR00169	KROK13	Scolopendromorpha	Cryptops parisi Brölemann, 1920	F	adult	species	preserved specimen	AP	2019	Ivan Kos
BMKR00170	KROK14	Geophilomorpha	Clinopodes carinthiacus (Latzel,1880)		juvenile	species	preserved specimen	MP	2019	Ivan Kos
BMKR00171	KROK14	Geophilomorpha	Geophilus alpinus Meinert, 1870	F	adult	species	preserved specimen	MP	2019	Ivan Kos
BMKR00172	KROK14	Geophilomorpha	Geophilus alpinus Meinert, 1870	F	adult	species	preserved specimen	MP	2019	Ivan Kos
BMKR00173	KROK14	Geophilomorpha	Schendyla armata Brölemann, 1901	F	adult	species	preserved specimen	MP	2019	Ivan Kos
BMKR00174	KROK14	Geophilomorpha	Schendyla armata Brölemann, 1901		juvenile	species	preserved specimen	MP	2019	Ivan Kos
BMKR00175	KROK14	Geophilomorpha	Schendyla armata Brölemann, 1901	F	adult	species	preserved specimen	MP	2019	Ivan Kos
BMKR00176	KROK14	Geophilomorpha	Schendyla armata Brölemann, 1901		juvenile	species	preserved specimen	MP	2019	Ivan Kos
BMKR00177	KROK14	Lithobiomorpha	Lithobius pygmaeus Latzel, 1880	M	adult	species	preserved specimen	MP	2019	Ivan Kos
BMKR00178	KROK14	Lithobiomorpha	Lithobius pygmaeus Latzel, 1880	F	adult	species	preserved specimen	MP	2019	Ivan Kos
BMKR00179	KROK14	Scolopendromorpha	Cryptops hortensis Donovan, 1810			species	preserved specimen	MP	2019	Ivan Kos
BMKR00180	KROK14	Scolopendromorpha	Cryptops hortensis Donovan, 1810			species	preserved specimen	MP	2019	Ivan Kos
BMKR00181	KROK14	Scolopendromorpha	Cryptops hortensis Donovan, 1810			species	preserved specimen	MP	2019	Ivan Kos
BMKR00182	KROK14	Scolopendromorpha	Cryptops hortensis Donovan, 1810			species	preserved specimen	MP	2019	Ivan Kos
BMKR00183	KROK14	Scolopendromorpha	Cryptops hortensis Donovan, 1810			species	preserved specimen	MP	2019	Ivan Kos
BMKR00184	KROK14	Scolopendromorpha	Cryptops hortensis Donovan, 1810			species	preserved specimen	MP	2019	Ivan Kos
BMKR00185	KROK14	Scolopendromorpha	Cryptops hortensis Donovan, 1810			species	preserved specimen	MP	2019	Ivan Kos
BMKR00186	KROK14	Scolopendromorpha	Cryptops hortensis Donovan, 1810			species	preserved specimen	MP	2019	Ivan Kos
BMKR00187	KROK14	Scolopendromorpha	Cryptops hortensis Donovan, 1810			species	preserved specimen	MP	2019	Ivan Kos
BMKR00188	KROK14	Scolopendromorpha	Cryptops hortensis Donovan, 1810			species	preserved specimen	MP	2019	Ivan Kos
BMKR00189	KROK14	Scolopendromorpha	Cryptops hortensis Donovan, 1810			species	preserved specimen	MP	2019	Ivan Kos
BMKR00190	KROK14	Scolopendromorpha	Cryptops hortensis Donovan, 1810			species	preserved specimen	MP	2019	Ivan Kos
BMKR00191	KROK14	Scolopendromorpha	Cryptops hortensis Donovan, 1810			species	preserved specimen	MP	2019	Ivan Kos
BMKR00192	KROK14	Scolopendromorpha	Cryptops hortensis Donovan, 1810			species	preserved specimen	MP	2019	Ivan Kos
BMKR00193	KROK14	Scolopendromorpha	Cryptops hortensis Donovan, 1810			species	preserved specimen	MP	2019	Ivan Kos
BMKR00194	KROK14	Scolopendromorpha	Cryptops parisi Brölemann, 1920			species	preserved specimen	MP	2019	Ivan Kos
BMKR00195	KROK14	Scolopendromorpha	Cryptops parisi Brölemann, 1920			species	preserved specimen	MP	2019	Ivan Kos
BMKR00196	KROK14	Scolopendromorpha	Cryptops parisi Brölemann, 1920			species	preserved specimen	MP	2019	Ivan Kos
BMKR00197	KROK14	Scolopendromorpha	Cryptops parisi Brölemann, 1920			species	preserved specimen	MP	2019	Ivan Kos
BMKR00198	KROK14	Lithobiomorpha	Lithobius anici sp.n.	F	adult	species	preserved specimen	AP	2019	Ivan Kos
BMKR00199	KROK14	Lithobiomorpha	Lithobius anici sp.n.	F	adult	species	preserved specimen	AP	2019	Ivan Kos
BMKR00200	KROK14	Lithobiomorpha	Lithobius anici sp.n.	F	adult	species	preserved specimen	AP	2019	Ivan Kos
BMKR00201	KROK14	Lithobiomorpha	Lithobius anici sp.n.	M	adult	species	preserved specimen	AP	2019	Ivan Kos
BMKR00202	KROK14	Lithobiomorpha	Lithobius anici sp.n.	M	adult	species	preserved specimen	AP	2019	Ivan Kos
BMKR00203	KROK14	Araneae	Comaroma simoni Bertkau, 1889	M	adult	species	preserved specimen	AP	2019	Žan Kuralt
BMKR00204	KROK14	Araneae	Comaroma simoni Bertkau, 1889	F	adult	species	preserved specimen	AP	2019	Žan Kuralt
BMKR00205	KROK14	Araneae	Comaroma simoni Bertkau, 1889	F	adult	species	preserved specimen	AP	2019	Žan Kuralt
BMKR00206	KROK14	Araneae	Comaroma simoni Bertkau, 1889	F	adult	species	preserved specimen	AP	2019	Žan Kuralt
BMKR00207	KROK28	Geophilomorpha	Schendyla armata Brölemann, 1901	M	adult	species	preserved specimen	AP	2019	Ivan Kos
BMKR00208	KROK14	Araneae	Comaroma simoni Bertkau, 1889	F	adult	species	preserved specimen	AP	2019	Žan Kuralt
BMKR00209	KROK14	Araneae	Comaroma simoni Bertkau, 1889	F	adult	species	preserved specimen	AP	2019	Žan Kuralt
BMKR00210	KROK29	Geophilomorpha	Schendyla armata Brölemann, 1901	M	adult	species	preserved specimen	AP	2019	Ivan Kos
BMKR00211	KROK14	Araneae	Comaroma simoni Bertkau, 1889	F	adult	species	preserved specimen	AP	2019	Žan Kuralt
BMKR00212	KROK14	Araneae	Comaroma simoni Bertkau, 1889	M	adult	species	preserved specimen	AP	2019	Žan Kuralt
BMKR00213	KROK14	Araneae	Comaroma simoni Bertkau, 1889	M	adult	species	preserved specimen	AP	2019	Žan Kuralt
BMKR00214	KROK14	Araneae	Comaroma simoni Bertkau, 1889	F	adult	species	preserved specimen	AP	2019	Žan Kuralt
BMKR00215	KROK14	Araneae	Comaroma simoni Bertkau, 1889	F	adult	species	preserved specimen	AP	2019	Žan Kuralt
BMKR00216	KROK14	Araneae	Comaroma simoni Bertkau, 1889	F	adult	species	preserved specimen	AP	2019	Žan Kuralt
BMKR00217	KROK14	Araneae	Comaroma simoni Bertkau, 1889	F	adult	species	preserved specimen	AP	2019	Žan Kuralt
BMKR00218	KROK14	Geophilomorpha	Dicellophilus carniolensis (C.L. Koch, 1847)			species	preserved specimen	AP	2019	Ivan Kos
BMKR00219	KROK14	Geophilomorpha	Dicellophilus carniolensis (C.L. Koch, 1847)	M	adult	species	preserved specimen	AP	2019	Ivan Kos
BMKR00220	KROK14	Geophilomorpha	Eurygeophilus pinguis (Brölemann, 1898)	M	adult	species	preserved specimen	AP	2019	Ivan Kos
BMKR00221	KROK15	Geophilomorpha	Schendyla tyrolensis Meinert, 1870	F	adult	species	preserved specimen	AP	2019	Ivan Kos
BMKR00222	KROK16	Geophilomorpha	Schendyla tyrolensis Meinert, 1870	M	adult	species	preserved specimen	AP	2019	Ivan Kos
BMKR00223	KROK28	Geophilomorpha	Schendyla tyrolensis Meinert, 1870	M	adult	species	preserved specimen	AP	2019	Ivan Kos	KROK029-19	MT994138
BMKR00224	KROK14	Geophilomorpha	Schendyla tyrolensis Meinert, 1870	F	adult	species	preserved specimen	AP	2019	Ivan Kos
BMKR00225	KROK14	Geophilomorpha	Schendyla tyrolensis Meinert, 1870	F	adult	species	preserved specimen	AP	2019	Ivan Kos
BMKR00226	KROK14	Geophilomorpha	Strigamia acuminata (Leach, 1814)	F	adult	species	preserved specimen	AP	2019	Ivan Kos
BMKR00227	KROK14	Geophilomorpha	Strigamia acuminata (Leach, 1814)	M	adult	species	preserved specimen	AP	2019	Ivan Kos
BMKR00228	KROK14	Geophilomorpha	Strigamia acuminata (Leach, 1814)	M	adult	species	preserved specimen	AP	2019	Ivan Kos
BMKR00229	KROK14	Geophilomorpha	Strigamia acuminata (Leach, 1814)	F	adult	species	preserved specimen	AP	2019	Ivan Kos
BMKR00230	KROK28	Geophilomorpha	Schendyla tyrolensis Meinert, 1870	M	adult	species	preserved specimen	AP	2019	Ivan Kos
BMKR00231	KROK29	Geophilomorpha	Schendyla tyrolensis Meinert, 1870	M	adult	species	preserved specimen	AP	2019	Ivan Kos
BMKR00232	KROK14	Geophilomorpha	Strigamia acuminata (Leach, 1814)	F	adult	species	preserved specimen	AP	2019	Ivan Kos
BMKR00233	KROK14	Geophilomorpha	Strigamia transsilvanica Verhoeff, 1928			species	preserved specimen	AP	2019	Ivan Kos
BMKR00234	KROK14	Lithobiomorpha	Lithobius carinthiacus Koren, 1992	M	adult	species	preserved specimen	AP	2019	Ivan Kos
BMKR00235	KROK31	Geophilomorpha	Schendyla tyrolensis Meinert, 1870	M	adult	species	preserved specimen	AP	2019	Ivan Kos	KROK095-20	OL874976
BMKR00236	KROK14	Lithobiomorpha	Lithobius pygmaeus Latzel, 1880	F	adult	species	preserved specimen	AP	2019	Ivan Kos
BMKR00237	KROK14	Lithobiomorpha	Lithobius pygmaeus Latzel, 1880	F	adult	species	preserved specimen	AP	2019	Ivan Kos
BMKR00238	KROK14	Lithobiomorpha	Lithobius pygmaeus Latzel, 1880	F	adult	species	preserved specimen	AP	2019	Ivan Kos
BMKR00239	KROK14	Lithobiomorpha	Lithobius pygmaeus Latzel, 1880	M	adult	species	preserved specimen	AP	2019	Ivan Kos
BMKR00240	KROK32	Geophilomorpha	Schendyla tyrolensis Meinert, 1870	F	adult	species	preserved specimen	AP	2019	Ivan Kos
BMKR00241	KROK17	Geophilomorpha	Strigamia acuminata (Leach, 1814)	M	adult	species	preserved specimen	AP	2019	Ivan Kos
BMKR00242	KROK14	Lithobiomorpha	Lithobius pygmaeus Latzel, 1880	F	adult	species	preserved specimen	AP	2019	Ivan Kos
BMKR00243	KROK14	Lithobiomorpha	Lithobius pygmaeus Latzel, 1880	M	adult	species	preserved specimen	AP	2019	Ivan Kos
BMKR00244	KROK14	Lithobiomorpha	Lithobius pygmaeus Latzel, 1880	F	adult	species	preserved specimen	AP	2019	Ivan Kos
BMKR00245	KROK14	Lithobiomorpha	Lithobius pygmaeus Latzel, 1880	M	adult	species	preserved specimen	AP	2019	Ivan Kos
BMKR00246	KROK14	Lithobiomorpha	Lithobius pygmaeus Latzel, 1880	M	adult	species	preserved specimen	AP	2019	Ivan Kos
BMKR00247	KROK19	Geophilomorpha	Strigamia acuminata (Leach, 1814)	F	adult	species	preserved specimen	AP	2019	Ivan Kos	KROK030-19	MT994143
BMKR00248	KROK11	Geophilomorpha	Strigamia acuminata (Leach, 1814)	M	adult	species	preserved specimen	AP	2019	Ivan Kos
BMKR00249	KROK14	Scolopendromorpha	Cryptops parisi Brölemann, 1920			species	preserved specimen	AP	2019	Ivan Kos
BMKR00250	KROK11	Geophilomorpha	Strigamia acuminata (Leach, 1814)	M	adult	species	preserved specimen	AP	2019	Ivan Kos
BMKR00251	KROK14	Geophilomorpha	Strigamia acuminata (Leach, 1814)	F	adult	species	preserved specimen	AP	2019	Ivan Kos
BMKR00252	KROK15	Geophilomorpha	Schendyla armata Brölemann, 1901	F	adult	species	preserved specimen	MP	2019	Ivan Kos
BMKR00253	KROK15	Geophilomorpha	Schendyla armata Brölemann, 1901	F	adult	species	preserved specimen	MP	2019	Ivan Kos
BMKR00254	KROK15	Geophilomorpha	Schendyla armata Brölemann, 1901	F	adult	species	preserved specimen	MP	2019	Ivan Kos
BMKR00255	KROK15	Geophilomorpha	Stenotaenia sorrentina Attems, 1903	F	adult	species	preserved specimen	MP	2019	Ivan Kos
BMKR00256	KROK15	Lithobiomorpha	Lithobius latro Meinert, 1872	F	adult	species	preserved specimen	MP	2019	Ivan Kos
BMKR00257	KROK15	Lithobiomorpha	Lithobius pygmaeus Latzel, 1880	F	adult	species	preserved specimen	MP	2019	Ivan Kos
BMKR00258	KROK15	Lithobiomorpha	Lithobius pygmaeus Latzel, 1880	M	adult	species	preserved specimen	MP	2019	Ivan Kos
BMKR00259	KROK15	Lithobiomorpha	Lithobius pygmaeus Latzel, 1880	F	adult	species	preserved specimen	MP	2019	Ivan Kos
BMKR00260	KROK15	Lithobiomorpha	Lithobius pygmaeus Latzel, 1880	F	adult	species	preserved specimen	MP	2019	Ivan Kos
BMKR00261	KROK15	Lithobiomorpha	Lithobius pygmaeus Latzel, 1880	M	adult	species	preserved specimen	MP	2019	Ivan Kos
BMKR00262	KROK15	Lithobiomorpha	Lithobius pygmaeus Latzel, 1880	M	adult	species	preserved specimen	MP	2019	Ivan Kos
BMKR00263	KROK15	Lithobiomorpha	Lithobius pygmaeus Latzel, 1880	F	adult	species	preserved specimen	MP	2019	Ivan Kos
BMKR00264	KROK15	Lithobiomorpha	Lithobius pygmaeus Latzel, 1880	F	adult	species	preserved specimen	MP	2019	Ivan Kos
BMKR00265	KROK15	Lithobiomorpha	Lithobius pygmaeus Latzel, 1880	F	adult	species	preserved specimen	MP	2019	Ivan Kos
BMKR00266	KROK15	Lithobiomorpha	Lithobius pygmaeus Latzel, 1880	M	adult	species	preserved specimen	MP	2019	Ivan Kos
BMKR00267	KROK15	Scolopendromorpha	Cryptops hortensis Donovan, 1810			species	preserved specimen	MP	2019	Ivan Kos
BMKR00268	KROK15	Scolopendromorpha	Cryptops hortensis Donovan, 1810			species	preserved specimen	MP	2019	Ivan Kos
BMKR00269	KROK15	Scolopendromorpha	Cryptops hortensis Donovan, 1810			species	preserved specimen	MP	2019	Ivan Kos
BMKR00270	KROK15	Scolopendromorpha	Cryptops hortensis Donovan, 1810			species	preserved specimen	MP	2019	Ivan Kos
BMKR00271	KROK15	Scolopendromorpha	Cryptops hortensis Donovan, 1810			species	preserved specimen	MP	2019	Ivan Kos
BMKR00272	KROK15	Scolopendromorpha	Cryptops hortensis Donovan, 1810			species	preserved specimen	MP	2019	Ivan Kos
BMKR00273	KROK15	Scolopendromorpha	Cryptops hortensis Donovan, 1810			species	preserved specimen	MP	2019	Ivan Kos
BMKR00274	KROK15	Scolopendromorpha	Cryptops hortensis Donovan, 1810			species	preserved specimen	MP	2019	Ivan Kos
BMKR00275	KROK15	Scolopendromorpha	Cryptops hortensis Donovan, 1810			species	preserved specimen	MP	2019	Ivan Kos
BMKR00276	KROK15	Scolopendromorpha	Cryptops hortensis Donovan, 1810			species	preserved specimen	MP	2019	Ivan Kos
BMKR00277	KROK15	Scolopendromorpha	Cryptops hortensis Donovan, 1810			species	preserved specimen	MP	2019	Ivan Kos
BMKR00278	KROK15	Scolopendromorpha	Cryptops parisi Brölemann, 1920			species	preserved specimen	MP	2019	Ivan Kos
BMKR00279	KROK15	Scolopendromorpha	Cryptops parisi Brölemann, 1920			species	preserved specimen	MP	2019	Ivan Kos
BMKR00280	KROK15	Scolopendromorpha	Cryptops parisi Brölemann, 1920			species	preserved specimen	MP	2019	Ivan Kos
BMKR00281	KROK15	Scolopendromorpha	Cryptops parisi Brölemann, 1920			species	preserved specimen	MP	2019	Ivan Kos
BMKR00282	KROK15	Scolopendromorpha	Cryptops parisi Brölemann, 1920			species	preserved specimen	MP	2019	Ivan Kos
BMKR00283	KROK15	Scolopendromorpha	Cryptops parisi Brölemann, 1920			species	preserved specimen	MP	2019	Ivan Kos
BMKR00284	KROK15	Scolopendromorpha	Cryptops parisi Brölemann, 1920			species	preserved specimen	MP	2019	Ivan Kos
BMKR00285	KROK15	Scolopendromorpha	Cryptops rucneri Matic, 1967			species	preserved specimen	MP	2019	Ivan Kos
BMKR00286	KROK15	Araneae	Comaroma simoni Bertkau, 1889	F	adult	species	preserved specimen	AP	2019	Žan Kuralt
BMKR00287	KROK15	Araneae	Comaroma simoni Bertkau, 1889	F	adult	species	preserved specimen	AP	2019	Žan Kuralt
BMKR00288	KROK15	Araneae	Comaroma simoni Bertkau, 1889	F	adult	species	preserved specimen	AP	2019	Žan Kuralt
BMKR00289	KROK15	Araneae	Comaroma simoni Bertkau, 1889	F	adult	species	preserved specimen	AP	2019	Žan Kuralt
BMKR00290	KROK15	Araneae	Comaroma simoni Bertkau, 1889	F	adult	species	preserved specimen	AP	2019	Žan Kuralt
BMKR00291	KROK15	Araneae	Comaroma simoni Bertkau, 1889	F	adult	species	preserved specimen	AP	2019	Žan Kuralt
BMKR00292	KROK15	Araneae	Comaroma simoni Bertkau, 1889	F	adult	species	preserved specimen	AP	2019	Žan Kuralt
BMKR00293	KROK15	Araneae	Comaroma simoni Bertkau, 1889	F	adult	species	preserved specimen	AP	2019	Žan Kuralt
BMKR00294	KROK15	Araneae	Comaroma simoni Bertkau, 1889	F	adult	species	preserved specimen	AP	2019	Žan Kuralt
BMKR00295	KROK15	Araneae	Comaroma simoni Bertkau, 1889	F	adult	species	preserved specimen	AP	2019	Žan Kuralt
BMKR00296	KROK15	Araneae	Comaroma simoni Bertkau, 1889	F	adult	species	preserved specimen	AP	2019	Žan Kuralt
BMKR00297	KROK15	Araneae	Comaroma simoni Bertkau, 1889	F	adult	species	preserved specimen	AP	2019	Žan Kuralt
BMKR00298	KROK15	Araneae	Comaroma simoni Bertkau, 1889	F	adult	species	preserved specimen	AP	2019	Žan Kuralt
BMKR00299	KROK15	Araneae	Comaroma simoni Bertkau, 1889	F	adult	species	preserved specimen	AP	2019	Žan Kuralt
BMKR00300	KROK14	Geophilomorpha	Strigamia acuminata (Leach, 1814)	F	adult	species	preserved specimen	AP	2019	Ivan Kos
BMKR00301	KROK16	Geophilomorpha	Strigamia acuminata (Leach, 1814)	F	adult	species	preserved specimen	AP	2019	Ivan Kos
BMKR00302	KROK18	Geophilomorpha	Strigamia acuminata (Leach, 1814)			species	preserved specimen	AP	2019	Ivan Kos
BMKR00303	KROK15	Geophilomorpha	Eurygeophilus pinguis (Brölemann, 1898)	F	adult	species	preserved specimen	AP	2019	Ivan Kos
BMKR00304	KROK15	Geophilomorpha	Eurygeophilus pinguis (Brölemann, 1898)	M	adult	species	preserved specimen	AP	2019	Ivan Kos
BMKR00305	KROK15	Geophilomorpha	Geophilus alpinus Meinert, 1870	M	adult	species	preserved specimen	AP	2019	Ivan Kos
BMKR00306	KROK22	Geophilomorpha	Strigamia acuminata (Leach, 1814)	F	adult	species	preserved specimen	AP	2019	Ivan Kos	KROK096-20	OL874979
BMKR00307	KROK15	Geophilomorpha	Schendyla armata Brölemann, 1901	M	adult	species	preserved specimen	AP	2019	Ivan Kos
BMKR00308	KROK15	Geophilomorpha	Schendyla armata Brölemann, 1901	F	adult	species	preserved specimen	AP	2019	Ivan Kos
BMKR00309	KROK15	Geophilomorpha	Schendyla armata Brölemann, 1901	F	adult	species	preserved specimen	AP	2019	Ivan Kos
BMKR00310	KROK15	Geophilomorpha	Schendyla tyrolensis Meinert, 1870	M	adult	species	preserved specimen	AP	2019	Ivan Kos
BMKR00311	KROK11	Geophilomorpha	Strigamia transsilvanica Verhoeff, 1928	M	adult	species	preserved specimen	AP	2019	Ivan Kos
BMKR00312	KROK15	Geophilomorpha	Stenotaenia sorrentina Attems, 1903	M	adult	species	preserved specimen	AP	2019	Ivan Kos
BMKR00313	KROK15	Geophilomorpha	Strigamia acuminata (Leach, 1814)	M	adult	species	preserved specimen	AP	2019	Ivan Kos
BMKR00314	KROK15	Geophilomorpha	Strigamia acuminata (Leach, 1814)		juvenile	species	preserved specimen	AP	2019	Ivan Kos
BMKR00315	KROK15	Geophilomorpha	Strigamia acuminata (Leach, 1814)	F	adult	species	preserved specimen	AP	2019	Ivan Kos
BMKR00316	KROK15	Geophilomorpha	Strigamia transsilvanica Verhoeff, 1928	F	adult	species	preserved specimen	AP	2019	Ivan Kos
BMKR00317	KROK15	Geophilomorpha	Strigamia transsilvanica Verhoeff, 1928	F	adult	species	preserved specimen	AP	2019	Ivan Kos
BMKR00318	KROK15	Geophilomorpha	Strigamia transsilvanica Verhoeff, 1928	M	adult	species	preserved specimen	AP	2019	Ivan Kos
BMKR00319	KROK15	Lithobiomorpha	Lithobius latro Meinert, 1872	M	adult	species	preserved specimen	AP	2019	Ivan Kos
BMKR00320	KROK15	Lithobiomorpha	Lithobius latro Meinert, 1872	M	adult	species	preserved specimen	MP	2019	Ivan Kos
BMKR00321	KROK15	Lithobiomorpha	Lithobius pygmaeus Latzel, 1880	M	adult	species	preserved specimen	AP	2019	Ivan Kos
BMKR00322	KROK15	Lithobiomorpha	Lithobius pygmaeus Latzel, 1880	F	adult	species	preserved specimen	AP	2019	Ivan Kos
BMKR00323	KROK15	Lithobiomorpha	Lithobius pygmaeus Latzel, 1880	M	adult	species	preserved specimen	AP	2019	Ivan Kos
BMKR00324	KROK15	Lithobiomorpha	Lithobius pygmaeus Latzel, 1880	M	adult	species	preserved specimen	AP	2019	Ivan Kos
BMKR00325	KROK15	Lithobiomorpha	Lithobius pygmaeus Latzel, 1880	F	adult	species	preserved specimen	AP	2019	Ivan Kos
BMKR00326	KROK15	Lithobiomorpha	Lithobius pygmaeus Latzel, 1880	M	adult	species	preserved specimen	AP	2019	Ivan Kos
BMKR00327	KROK15	Lithobiomorpha	Lithobius pygmaeus Latzel, 1880	F	adult	species	preserved specimen	AP	2019	Ivan Kos
BMKR00328	KROK15	Lithobiomorpha	Lithobius pygmaeus Latzel, 1880	F	adult	species	preserved specimen	AP	2019	Ivan Kos
BMKR00329	KROK15	Lithobiomorpha	Lithobius pygmaeus Latzel, 1880	M	adult	species	preserved specimen	AP	2019	Ivan Kos
BMKR00330	KROK15	Lithobiomorpha	Lithobius pygmaeus Latzel, 1880	F	adult	species	preserved specimen	AP	2019	Ivan Kos
BMKR00331	KROK15	Lithobiomorpha	Lithobius pygmaeus Latzel, 1880	F	adult	species	preserved specimen	MP	2019	Ivan Kos
BMKR00332	KROK15	Scolopendromorpha	Cryptops hortensis Donovan, 1810			species	preserved specimen	MP	2019	Ivan Kos
BMKR00333	KROK15	Scolopendromorpha	Cryptops hortensis Donovan, 1810			species	preserved specimen	MP	2019	Ivan Kos
BMKR00334	KROK15	Scolopendromorpha	Cryptops parisi Brölemann, 1920			species	preserved specimen	AP	2019	Ivan Kos
BMKR00335	KROK15	Scolopendromorpha	Cryptops parisi Brölemann, 1920			species	preserved specimen	AP	2019	Ivan Kos
BMKR00336	KROK15	Scolopendromorpha	Cryptops parisi Brölemann, 1920			species	preserved specimen	AP	2019	Ivan Kos
BMKR00337	KROK15	Scolopendromorpha	Cryptops parisi Brölemann, 1920			species	preserved specimen	AP	2019	Ivan Kos
BMKR00338	KROK15	Scolopendromorpha	Cryptops parisi Brölemann, 1920			species	preserved specimen	AP	2019	Ivan Kos
BMKR00339	KROK15	Scolopendromorpha	Cryptops parisi Brölemann, 1920			species	preserved specimen	AP	2019	Ivan Kos
BMKR00340	KROK15	Scolopendromorpha	Cryptops parisi Brölemann, 1920			species	preserved specimen	AP	2019	Ivan Kos
BMKR00341	KROK15	Scolopendromorpha	Cryptops parisi Brölemann, 1920			species	preserved specimen	MP	2019	Ivan Kos
BMKR00342	KROK15	Scolopendromorpha	Cryptops rucneri Matic, 1967			species	preserved specimen	MP	2019	Ivan Kos
BMKR00343	KROK16	Geophilomorpha	Clinopodes carinthiacus (Latzel,1880)	F	adult	species	preserved specimen	MP	2019	Ivan Kos
BMKR00344	KROK16	Geophilomorpha	Clinopodes carinthiacus (Latzel,1880)	M	adult	species	preserved specimen	MP	2019	Ivan Kos
BMKR00345	KROK16	Geophilomorpha	Schendyla armata Brölemann, 1901	M	adult	species	preserved specimen	MP	2019	Ivan Kos
BMKR00346	KROK16	Lithobiomorpha	Lithobius pygmaeus Latzel, 1880	F	adult	species	preserved specimen	MP	2019	Ivan Kos
BMKR00347	KROK16	Lithobiomorpha	Lithobius pygmaeus Latzel, 1880	M	adult	species	preserved specimen	MP	2019	Ivan Kos
BMKR00348	KROK16	Lithobiomorpha	Lithobius pygmaeus Latzel, 1880	M	adult	species	preserved specimen	MP	2019	Ivan Kos
BMKR00349	KROK16	Scolopendromorpha	Cryptops hortensis Donovan, 1810			species	preserved specimen	MP	2019	Ivan Kos
BMKR00350	KROK16	Scolopendromorpha	Cryptops parisi Brölemann, 1920			species	preserved specimen	MP	2019	Ivan Kos
BMKR00351	KROK16	Scolopendromorpha	Cryptops parisi Brölemann, 1920			species	preserved specimen	MP	2019	Ivan Kos
BMKR00352	KROK16	Scolopendromorpha	Cryptops parisi Brölemann, 1920			species	preserved specimen	MP	2019	Ivan Kos
BMKR00353	KROK16	Scolopendromorpha	Cryptops parisi Brölemann, 1920			species	preserved specimen	MP	2019	Ivan Kos
BMKR00354	KROK16	Scolopendromorpha	Cryptops rucneri Matic, 1967			species	preserved specimen	MP	2019	Ivan Kos
BMKR00355	KROK16	Scolopendromorpha	Cryptops rucneri Matic, 1967			species	preserved specimen	MP	2019	Ivan Kos
BMKR00356	KROK16	Lithobiomorpha	Lithobius anici sp.n.	M	adult	species	preserved specimen	AP	2019	Ivan Kos
BMKR00357	KROK16	Lithobiomorpha	Lithobius anici sp.n.	M	adult	species	preserved specimen	AP	2019	Ivan Kos
BMKR00358	KROK16	Lithobiomorpha	Lithobius anici sp.n.	M	adult	species	preserved specimen	AP	2019	Ivan Kos
BMKR00359	KROK16	Lithobiomorpha	Lithobius anici sp.n.	F	adult	species	preserved specimen	AP	2019	Ivan Kos
BMKR00360	KROK16	Lithobiomorpha	Lithobius anici sp.n.	F	adult	species	preserved specimen	AP	2019	Ivan Kos
BMKR00361	KROK16	Geophilomorpha	Strigamia transsilvanica Verhoeff, 1928	F	adult	species	preserved specimen	AP	2019	Ivan Kos
BMKR00362	KROK16	Lithobiomorpha	Lithobius anici sp.n.	F	adult	species	preserved specimen	AP	2019	Ivan Kos
BMKR00363	KROK16	Lithobiomorpha	Lithobius anici sp.n.	F	adult	species	preserved specimen	AP	2019	Ivan Kos
BMKR00364	KROK16	Araneae	Comaroma simoni Bertkau, 1889	F	adult	species	preserved specimen	AP	2019	Žan Kuralt
BMKR00365	KROK16	Araneae	Comaroma simoni Bertkau, 1889	F	adult	species	preserved specimen	AP	2019	Žan Kuralt
BMKR00366	KROK16	Araneae	Comaroma simoni Bertkau, 1889	F	adult	species	preserved specimen	AP	2019	Žan Kuralt
BMKR00367	KROK16	Araneae	Comaroma simoni Bertkau, 1889	F	adult	species	preserved specimen	AP	2019	Žan Kuralt
BMKR00368	KROK16	Araneae	Comaroma simoni Bertkau, 1889	M	adult	species	preserved specimen	AP	2019	Žan Kuralt
BMKR00369	KROK16	Araneae	Comaroma simoni Bertkau, 1889	M	adult	species	preserved specimen	AP	2019	Žan Kuralt
BMKR00370	KROK16	Araneae	Comaroma simoni Bertkau, 1889	F	adult	species	preserved specimen	AP	2019	Žan Kuralt
BMKR00371	KROK16	Araneae	Comaroma simoni Bertkau, 1889	M	adult	species	preserved specimen	AP	2019	Žan Kuralt
BMKR00372	KROK16	Araneae	Comaroma simoni Bertkau, 1889	F	adult	species	preserved specimen	AP	2019	Žan Kuralt
BMKR00373	KROK16	Araneae	Comaroma simoni Bertkau, 1889	M	adult	species	preserved specimen	AP	2019	Žan Kuralt
BMKR00374	KROK16	Araneae	Comaroma simoni Bertkau, 1889	F	adult	species	preserved specimen	AP	2019	Žan Kuralt
BMKR00375	KROK18	Geophilomorpha	Strigamia transsilvanica Verhoeff, 1928	M	adult	species	preserved specimen	AP	2019	Ivan Kos
BMKR00376	KROK20	Geophilomorpha	Strigamia transsilvanica Verhoeff, 1928	F	adult	species	preserved specimen	AP	2019	Ivan Kos	KROK031-19	MT994144
BMKR00377	KROK20	Geophilomorpha	Strigamia transsilvanica Verhoeff, 1928	M	adult	species	preserved specimen	AP	2019	Ivan Kos
BMKR00378	KROK31	Geophilomorpha	Strigamia transsilvanica Verhoeff, 1928	F	adult	species	preserved specimen	AP	2019	Ivan Kos
BMKR00379	KROK16	Geophilomorpha	Clinopodes carinthiacus (Latzel,1880)	F	adult	species	preserved specimen	AP	2019	Ivan Kos
BMKR00380	KROK16	Geophilomorpha	Dicellophilus carniolensis (C.L. Koch, 1847)			species	preserved specimen	AP	2019	Ivan Kos
BMKR00381	KROK16	Geophilomorpha	Eurygeophilus pinguis (Brölemann, 1898)	F	adult	species	preserved specimen	AP	2019	Ivan Kos
BMKR00382	KROK16	Geophilomorpha	Eurygeophilus pinguis (Brölemann, 1898)	M	adult	species	preserved specimen	AP	2019	Ivan Kos
BMKR00383	KROK14	Geophilomorpha	Dicellophilus carniolensis (C.L. Koch, 1847)			species	preserved specimen	AP	2019	Ivan Kos	KROK032-19	MT994090
BMKR00384	KROK16	Geophilomorpha	Geophilus electricus (Linné, 1758)	F	adult	species	preserved specimen	AP	2019	Ivan Kos
BMKR00385	KROK16	Geophilomorpha	Geophilus flavus (De Geer, 1778)	M	adult	species	preserved specimen	AP	2019	Ivan Kos
BMKR00386	KROK16	Geophilomorpha	Schendyla armata Brölemann, 1901	M	adult	species	preserved specimen	AP	2019	Ivan Kos
BMKR00387	KROK20	Geophilomorpha	Strigamia acuminata (Leach, 1814)	F	adult	species	preserved specimen	AP	2019	Ivan Kos
BMKR00388	KROK26	Geophilomorpha	Strigamia acuminata (Leach, 1814)	F	adult	species	preserved specimen	AP	2019	Ivan Kos
BMKR00389	KROK31	Lithobiomorpha	Lithobius latro Meinert, 1872	M	adult	species	preserved specimen	AP	2019	Ivan Kos
BMKR00390	KROK29	Lithobiomorpha	Lithobius carinthiacus Koren, 1992	F	adult	species	preserved specimen	AP	2019	Ivan Kos
BMKR00391	KROK31	Geophilomorpha	Clinopodes carinthiacus (Latzel,1880)	M	adult	species	preserved specimen	AP	2019	Ivan Kos
BMKR00392	KROK16	Geophilomorpha	Stenotaenia sorrentina Attems, 1903		juvenile	species	preserved specimen	AP	2019	Ivan Kos
BMKR00393	KROK16	Geophilomorpha	Strigamia acuminata (Leach, 1814)	F	adult	species	preserved specimen	AP	2019	Ivan Kos
BMKR00394	KROK16	Geophilomorpha	Strigamia acuminata (Leach, 1814)	M	adult	species	preserved specimen	AP	2019	Ivan Kos
BMKR00395	KROK16	Geophilomorpha	Strigamia acuminata (Leach, 1814)	M	adult	species	preserved specimen	AP	2019	Ivan Kos
BMKR00396	KROK16	Geophilomorpha	Strigamia acuminata (Leach, 1814)	F	adult	species	preserved specimen	AP	2019	Ivan Kos
BMKR00397	KROK16	Geophilomorpha	Strigamia acuminata (Leach, 1814)	F	adult	species	preserved specimen	AP	2019	Ivan Kos
BMKR00398	KROK16	Geophilomorpha	Strigamia acuminata (Leach, 1814)	F	adult	species	preserved specimen	AP	2019	Ivan Kos
BMKR00399	KROK16	Geophilomorpha	Strigamia acuminata (Leach, 1814)	F	adult	species	preserved specimen	AP	2019	Ivan Kos
BMKR00400	KROK16	Geophilomorpha	Strigamia acuminata (Leach, 1814)	F	adult	species	preserved specimen	AP	2019	Ivan Kos
BMKR00401	KROK14	Geophilomorpha	Geophilus alpinus Meinert, 1870	M	adult	species	preserved specimen	AP	2019	Ivan Kos
BMKR00402	KROK16	Geophilomorpha	Strigamia acuminata (Leach, 1814)	F	adult	species	preserved specimen	AP	2019	Ivan Kos
BMKR00403	KROK16	Geophilomorpha	Strigamia acuminata (Leach, 1814)	M	adult	species	preserved specimen	AP	2019	Ivan Kos
BMKR00404	KROK16	Geophilomorpha	Strigamia transsilvanica Verhoeff, 1928		juvenile	species	preserved specimen	AP	2019	Ivan Kos
BMKR00405	KROK15	Geophilomorpha	Geophilus alpinus Meinert, 1870	M	adult	species	preserved specimen	AP	2019	Ivan Kos
BMKR00406	KROK16	Geophilomorpha	Strigamia transsilvanica Verhoeff, 1928		juvenile	species	preserved specimen	AP	2019	Ivan Kos
BMKR00407	KROK16	Geophilomorpha	Geophilus alpinus Meinert, 1870	F	adult	species	preserved specimen	AP	2019	Ivan Kos
BMKR00408	KROK16	Lithobiomorpha	Lithobius carinthiacus Koren, 1992	M	adult	species	preserved specimen	AP	2019	Ivan Kos
BMKR00409	KROK14	Geophilomorpha	Clinopodes carinthiacus (Latzel,1880)	F	adult	species	preserved specimen	AP	2019	Ivan Kos	KROK098-20	OL874929
BMKR00410	KROK16	Lithobiomorpha	Lithobius pygmaeus Latzel, 1880	F	adult	species	preserved specimen	AP	2019	Ivan Kos
BMKR00411	KROK16	Lithobiomorpha	Lithobius pygmaeus Latzel, 1880	F	adult	species	preserved specimen	AP	2019	Ivan Kos
BMKR00412	KROK16	Lithobiomorpha	Lithobius pygmaeus Latzel, 1880	M	adult	species	preserved specimen	AP	2019	Ivan Kos
BMKR00413	KROK13	Geophilomorpha	Clinopodes carinthiacus (Latzel,1880)	F	adult	species	preserved specimen	AP	2019	Ivan Kos
BMKR00414	KROK16	Lithobiomorpha	Lithobius pygmaeus Latzel, 1880	F	adult	species	preserved specimen	AP	2019	Ivan Kos
BMKR00415	KROK16	Lithobiomorpha	Lithobius pygmaeus Latzel, 1880	F	adult	species	preserved specimen	AP	2019	Ivan Kos
BMKR00416	KROK16	Lithobiomorpha	Lithobius pygmaeus Latzel, 1880	F	adult	species	preserved specimen	AP	2019	Ivan Kos
BMKR00417	KROK16	Lithobiomorpha	Lithobius pygmaeus Latzel, 1880	M	adult	species	preserved specimen	AP	2019	Ivan Kos
BMKR00418	KROK16	Lithobiomorpha	Lithobius pygmaeus Latzel, 1880	M	adult	species	preserved specimen	AP	2019	Ivan Kos
BMKR00419	KROK16	Lithobiomorpha	Lithobius pygmaeus Latzel, 1880	M	adult	species	preserved specimen	AP	2019	Ivan Kos
BMKR00420	KROK16	Lithobiomorpha	Lithobius pygmaeus Latzel, 1880	F	adult	species	preserved specimen	AP	2019	Ivan Kos
BMKR00421	KROK16	Lithobiomorpha	Lithobius pygmaeus Latzel, 1880	F	adult	species	preserved specimen	AP	2019	Ivan Kos
BMKR00422	KROK16	Lithobiomorpha	Lithobius pygmaeus Latzel, 1880	F	adult	species	preserved specimen	AP	2019	Ivan Kos
BMKR00423	KROK16	Scolopendromorpha	Cryptops hortensis Donovan, 1810			species	preserved specimen	MP	2019	Ivan Kos
BMKR00424	KROK16	Scolopendromorpha	Cryptops parisi Brölemann, 1920			species	preserved specimen	AP	2019	Ivan Kos
BMKR00425	KROK16	Scolopendromorpha	Cryptops parisi Brölemann, 1920			species	preserved specimen	AP	2019	Ivan Kos
BMKR00426	KROK33	Geophilomorpha	Clinopodes carinthiacus (Latzel,1880)	F	adult	species	preserved specimen	AP	2019	Ivan Kos	KROK100-20	OL874928
BMKR00427	KROK33	Geophilomorpha	Clinopodes carinthiacus (Latzel,1880)	F	adult	species	preserved specimen	AP	2019	Ivan Kos
BMKR00428	KROK16	Scolopendromorpha	Cryptops parisi Brölemann, 1920			species	preserved specimen	AP	2019	Ivan Kos
BMKR00429	KROK17	Geophilomorpha	Geophilus alpinus Meinert, 1870	M	adult	species	preserved specimen	MP	2019	Ivan Kos
BMKR00430	KROK17	Geophilomorpha	Schendyla armata Brölemann, 1901	M	adult	species	preserved specimen	MP	2019	Ivan Kos
BMKR00431	KROK17	Geophilomorpha	Schendyla armata Brölemann, 1901		juvenile	species	preserved specimen	MP	2019	Ivan Kos
BMKR00432	KROK17	Lithobiomorpha	Lithobius carinthiacus Koren, 1992	M	adult	species	preserved specimen	MP	2019	Ivan Kos
BMKR00433	KROK17	Lithobiomorpha	Lithobius latro Meinert, 1872	M	adult	species	preserved specimen	MP	2019	Ivan Kos
BMKR00434	KROK17	Lithobiomorpha	Lithobius pygmaeus Latzel, 1880	F	adult	species	preserved specimen	MP	2019	Ivan Kos
BMKR00435	KROK17	Lithobiomorpha	Lithobius pygmaeus Latzel, 1880	M	adult	species	preserved specimen	MP	2019	Ivan Kos
BMKR00436	KROK17	Lithobiomorpha	Lithobius pygmaeus Latzel, 1880	F	adult	species	preserved specimen	MP	2019	Ivan Kos
BMKR00437	KROK17	Lithobiomorpha	Lithobius pygmaeus Latzel, 1880	F	adult	species	preserved specimen	MP	2019	Ivan Kos
BMKR00438	KROK17	Lithobiomorpha	Lithobius pygmaeus Latzel, 1880	F	adult	species	preserved specimen	MP	2019	Ivan Kos
BMKR00439	KROK17	Lithobiomorpha	Lithobius pygmaeus Latzel, 1880	F	adult	species	preserved specimen	MP	2019	Ivan Kos
BMKR00440	KROK17	Lithobiomorpha	Lithobius pygmaeus Latzel, 1880	M	adult	species	preserved specimen	MP	2019	Ivan Kos
BMKR00441	KROK17	Lithobiomorpha	Lithobius pygmaeus Latzel, 1880	F	adult	species	preserved specimen	MP	2019	Ivan Kos
BMKR00442	KROK17	Lithobiomorpha	Lithobius pygmaeus Latzel, 1880	F	adult	species	preserved specimen	MP	2019	Ivan Kos
BMKR00443	KROK17	Lithobiomorpha	Lithobius pygmaeus Latzel, 1880	F	adult	species	preserved specimen	MP	2019	Ivan Kos
BMKR00444	KROK17	Lithobiomorpha	Lithobius pygmaeus Latzel, 1880	F	adult	species	preserved specimen	MP	2019	Ivan Kos
BMKR00445	KROK17	Lithobiomorpha	Lithobius pygmaeus Latzel, 1880	M	adult	species	preserved specimen	MP	2019	Ivan Kos
BMKR00446	KROK17	Lithobiomorpha	Lithobius pygmaeus Latzel, 1880	F	adult	species	preserved specimen	MP	2019	Ivan Kos
BMKR00447	KROK17	Lithobiomorpha	Lithobius pygmaeus Latzel, 1880	M	adult	species	preserved specimen	MP	2019	Ivan Kos
BMKR00448	KROK17	Lithobiomorpha	Lithobius pygmaeus Latzel, 1880	M	adult	species	preserved specimen	MP	2019	Ivan Kos
BMKR00449	KROK17	Lithobiomorpha	Lithobius pygmaeus Latzel, 1880	F	adult	species	preserved specimen	MP	2019	Ivan Kos
BMKR00450	KROK17	Lithobiomorpha	Lithobius pygmaeus Latzel, 1880	F	adult	species	preserved specimen	MP	2019	Ivan Kos
BMKR00451	KROK17	Scolopendromorpha	Cryptops hortensis Donovan, 1810			species	preserved specimen	MP	2019	Ivan Kos
BMKR00452	KROK17	Scolopendromorpha	Cryptops hortensis Donovan, 1810			species	preserved specimen	MP	2019	Ivan Kos
BMKR00453	KROK17	Scolopendromorpha	Cryptops hortensis Donovan, 1810			species	preserved specimen	MP	2019	Ivan Kos
BMKR00454	KROK17	Scolopendromorpha	Cryptops hortensis Donovan, 1810			species	preserved specimen	MP	2019	Ivan Kos
BMKR00455	KROK17	Scolopendromorpha	Cryptops hortensis Donovan, 1810			species	preserved specimen	MP	2019	Ivan Kos
BMKR00456	KROK17	Scolopendromorpha	Cryptops hortensis Donovan, 1810			species	preserved specimen	MP	2019	Ivan Kos
BMKR00457	KROK17	Scolopendromorpha	Cryptops hortensis Donovan, 1810			species	preserved specimen	MP	2019	Ivan Kos
BMKR00458	KROK17	Scolopendromorpha	Cryptops parisi Brölemann, 1920			species	preserved specimen	MP	2019	Ivan Kos
BMKR00459	KROK17	Scolopendromorpha	Cryptops parisi Brölemann, 1920			species	preserved specimen	MP	2019	Ivan Kos
BMKR00460	KROK17	Scolopendromorpha	Cryptops parisi Brölemann, 1920			species	preserved specimen	MP	2019	Ivan Kos
BMKR00461	KROK17	Scolopendromorpha	Cryptops rucneri Matic, 1967			species	preserved specimen	MP	2019	Ivan Kos
BMKR00462	KROK17	Scolopendromorpha	Cryptops rucneri Matic, 1967			species	preserved specimen	MP	2019	Ivan Kos
BMKR00463	KROK17	Araneae	Centromerus cavernarum (L.Koch, 1872)	F	adult	species	preserved specimen	AP	2019	Žan Kuralt
BMKR00464	KROK30	Geophilomorpha	Schendyla armata Brölemann, 1901	F	adult	species	preserved specimen	AP	2019	Ivan Kos
BMKR00465	KROK17	Araneae	Centrophantes roeweri (Wiehle, 1961)	F	adult	species	preserved specimen	AP	2019	Žan Kuralt
BMKR00466	KROK30	Geophilomorpha	Schendyla armata Brölemann, 1901	M	adult	species	preserved specimen	AP	2019	Ivan Kos	KROK102-20	OL874971
BMKR00467	KROK17	Araneae	Comaroma simoni Bertkau, 1889	F	adult	species	preserved specimen	AP	2019	Žan Kuralt
BMKR00468	KROK17	Araneae	Comaroma simoni Bertkau, 1889	M	adult	species	preserved specimen	AP	2019	Žan Kuralt
BMKR00469	KROK17	Araneae	Comaroma simoni Bertkau, 1889	F	adult	species	preserved specimen	AP	2019	Žan Kuralt
BMKR00470	KROK17	Araneae	Comaroma simoni Bertkau, 1889	F	adult	species	preserved specimen	AP	2019	Žan Kuralt
BMKR00471	KROK17	Araneae	Harpactea lepida (C. L. Koch, 1838)	M	adult	species	preserved specimen	AP	2019	Žan Kuralt
BMKR00472	KROK43	Lithobiomorpha	Eupolybothrus tridentinus (Fanzago, 1874)	M	adult	species	preserved specimen	AP	2019	Ivan Kos
BMKR00473	KROK43	Lithobiomorpha	Eupolybothrus tridentinus (Fanzago, 1874)	F	adult	species	preserved specimen	AP	2019	Ivan Kos
BMKR00474	KROK17	Geophilomorpha	Schendyla armata Brölemann, 1901	M	adult	species	preserved specimen	AP	2019	Ivan Kos
BMKR00475	KROK17	Geophilomorpha	Schendyla armata Brölemann, 1901	M	adult	species	preserved specimen	AP	2019	Ivan Kos
BMKR00476	KROK17	Geophilomorpha	Schendyla armata Brölemann, 1901	F	adult	species	preserved specimen	AP	2019	Ivan Kos
BMKR00477	KROK46	Lithobiomorpha	Eupolybothrus tridentinus (Fanzago, 1874)	F	adult	species	preserved specimen	AP	2019	Ivan Kos	KROK035-19	MT994100
BMKR00478	KROK46	Lithobiomorpha	Eupolybothrus tridentinus (Fanzago, 1874)	F	adult	species	preserved specimen	AP	2019	Ivan Kos
BMKR00479	KROK46	Lithobiomorpha	Eupolybothrus tridentinus (Fanzago, 1874)	F	adult	species	preserved specimen	AP	2019	Ivan Kos
BMKR00480	KROK17	Lithobiomorpha	Harpolithobius gottscheensis Verhoeff, 1937			species	preserved specimen	AP	2019	Ivan Kos	KROK036-19	MT994105
BMKR00481	KROK17	Geophilomorpha	Schendyla tyrolensis Meinert, 1870	M	adult	species	preserved specimen	AP	2019	Ivan Kos
BMKR00482	KROK17	Geophilomorpha	Strigamia acuminata (Leach, 1814)		juvenile	species	preserved specimen	AP	2019	Ivan Kos
BMKR00483	KROK17	Geophilomorpha	Strigamia acuminata (Leach, 1814)	F	adult	species	preserved specimen	AP	2019	Ivan Kos
BMKR00484	KROK17	Geophilomorpha	Strigamia acuminata (Leach, 1814)	M	adult	species	preserved specimen	AP	2019	Ivan Kos
BMKR00485	KROK19	Lithobiomorpha	Harpolithobius gottscheensis Verhoeff, 1937	F	adult	species	preserved specimen	AP	2019	Ivan Kos	KROK103-20	OL874951
BMKR00486	KROK17	Geophilomorpha	Strigamia acuminata (Leach, 1814)			species	preserved specimen	AP	2019	Ivan Kos
BMKR00487	KROK17	Geophilomorpha	Strigamia acuminata (Leach, 1814)			species	preserved specimen	AP	2019	Ivan Kos
BMKR00488	KROK17	Geophilomorpha	Strigamia acuminata (Leach, 1814)			species	preserved specimen	AP	2019	Ivan Kos
BMKR00489	KROK17	Geophilomorpha	Strigamia transsilvanica Verhoeff, 1928		juvenile	species	preserved specimen	AP	2019	Ivan Kos
BMKR00490	KROK17	Geophilomorpha	Strigamia transsilvanica Verhoeff, 1928		juvenile	species	preserved specimen	AP	2019	Ivan Kos
BMKR00491	KROK17	Geophilomorpha	Strigamia transsilvanica Verhoeff, 1928			species	preserved specimen	AP	2019	Ivan Kos
BMKR00492	KROK11	Lithobiomorpha	Lithobius agilis C.L. Koch, 1847	F	adult	species	preserved specimen	AP	2019	Ivan Kos
BMKR00493	KROK17	Lithobiomorpha	Lithobius carinthiacus Koren, 1992	M	adult	species	preserved specimen	AP	2019	Ivan Kos
BMKR00494	KROK11	Lithobiomorpha	Lithobius castaneus Newport, 1844	F	adult	species	preserved specimen	AP	2019	Ivan Kos
BMKR00495	KROK17	Lithobiomorpha	Lithobius castaneus Newport, 1844	M	adult	species	preserved specimen	AP	2019	Ivan Kos
BMKR00496	KROK17	Lithobiomorpha	Lithobius latro Meinert, 1872	M	adult	species	preserved specimen	AP	2019	Ivan Kos
BMKR00497	KROK17	Lithobiomorpha	Lithobius pygmaeus Latzel, 1880	M	adult	species	preserved specimen	AP	2019	Ivan Kos
BMKR00498	KROK17	Lithobiomorpha	Lithobius pygmaeus Latzel, 1880	M	adult	species	preserved specimen	AP	2019	Ivan Kos
BMKR00499	KROK17	Lithobiomorpha	Lithobius pygmaeus Latzel, 1880	M	adult	species	preserved specimen	AP	2019	Ivan Kos
BMKR00500	KROK17	Lithobiomorpha	Lithobius pygmaeus Latzel, 1880	M	adult	species	preserved specimen	AP	2019	Ivan Kos
BMKR00501	KROK17	Lithobiomorpha	Lithobius pygmaeus Latzel, 1880	F	adult	species	preserved specimen	AP	2019	Ivan Kos
BMKR00502	KROK17	Lithobiomorpha	Lithobius pygmaeus Latzel, 1880	F	adult	species	preserved specimen	AP	2019	Ivan Kos
BMKR00503	KROK17	Lithobiomorpha	Lithobius pygmaeus Latzel, 1880	M	adult	species	preserved specimen	AP	2019	Ivan Kos
BMKR00504	KROK17	Lithobiomorpha	Lithobius pygmaeus Latzel, 1880	M	adult	species	preserved specimen	AP	2019	Ivan Kos
BMKR00505	KROK20	Lithobiomorpha	Lithobius castaneus Newport, 1844	F	adult	species	preserved specimen	AP	2019	Ivan Kos	KROK037-19	MT994113
BMKR00506	KROK43	Lithobiomorpha	Lithobius castaneus Newport, 1844	F	adult	species	preserved specimen	AP	2019	Ivan Kos
BMKR00507	KROK17	Lithobiomorpha	Lithobius pygmaeus Latzel, 1880	F	adult	species	preserved specimen	MP	2019	Ivan Kos
BMKR00508	KROK17	Scolopendromorpha	Cryptops hortensis Donovan, 1810			species	preserved specimen	MP	2019	Ivan Kos
BMKR00509	KROK17	Scolopendromorpha	Cryptops hortensis Donovan, 1810			species	preserved specimen	MP	2019	Ivan Kos
BMKR00510	KROK17	Scolopendromorpha	Cryptops hortensis Donovan, 1810			species	preserved specimen	MP	2019	Ivan Kos
BMKR00511	KROK17	Scolopendromorpha	Cryptops hortensis Donovan, 1810			species	preserved specimen	MP	2019	Ivan Kos
BMKR00512	KROK17	Scolopendromorpha	Cryptops hortensis Donovan, 1810			species	preserved specimen	MP	2019	Ivan Kos
BMKR00513	KROK17	Scolopendromorpha	Cryptops hortensis Donovan, 1810			species	preserved specimen	MP	2019	Ivan Kos
BMKR00514	KROK17	Scolopendromorpha	Cryptops hortensis Donovan, 1810			species	preserved specimen	MP	2019	Ivan Kos
BMKR00515	KROK17	Scolopendromorpha	Cryptops hortensis Donovan, 1810			species	preserved specimen	MP	2019	Ivan Kos
BMKR00516	KROK17	Scolopendromorpha	Cryptops hortensis Donovan, 1810			species	preserved specimen	MP	2019	Ivan Kos
BMKR00517	KROK11	Lithobiomorpha	Lithobius dentatus C.L.Koch, 1844	F	adult	species	preserved specimen	AP	2019	Ivan Kos
BMKR00518	KROK14	Lithobiomorpha	Lithobius dentatus C.L.Koch, 1844	F	adult	species	preserved specimen	AP	2019	Ivan Kos	KROK038-19	MT994116
BMKR00519	KROK17	Scolopendromorpha	Cryptops parisi Brölemann, 1920			species	preserved specimen	AP	2019	Ivan Kos
BMKR00520	KROK17	Scolopendromorpha	Cryptops parisi Brölemann, 1920			species	preserved specimen	AP	2019	Ivan Kos
BMKR00521	KROK19	Lithobiomorpha	Lithobius dentatus C.L.Koch, 1844	M	adult	species	preserved specimen	AP	2019	Ivan Kos
BMKR00522	KROK17	Scolopendromorpha	Cryptops parisi Brölemann, 1920			species	preserved specimen	MP	2019	Ivan Kos
BMKR00523	KROK17	Scolopendromorpha	Cryptops parisi Brölemann, 1920			species	preserved specimen	MP	2019	Ivan Kos
BMKR00524	KROK17	Scolopendromorpha	Cryptops parisi Brölemann, 1920			species	preserved specimen	MP	2019	Ivan Kos
BMKR00525	KROK18	Geophilomorpha	Clinopodes carinthiacus (Latzel,1880)		juvenile	species	preserved specimen	MP	2019	Ivan Kos
BMKR00526	KROK18	Geophilomorpha	Geophilus electricus (Linné, 1758)		juvenile	species	preserved specimen	MP	2019	Ivan Kos
BMKR00527	KROK18	Geophilomorpha	Schendyla armata Brölemann, 1901	F	adult	species	preserved specimen	MP	2019	Ivan Kos
BMKR00528	KROK18	Geophilomorpha	Schendyla armata Brölemann, 1901		juvenile	species	preserved specimen	MP	2019	Ivan Kos
BMKR00529	KROK18	Geophilomorpha	Schendyla carniolensis Verhoeff, 1902	M	adult	species	preserved specimen	MP	2019	Ivan Kos
BMKR00530	KROK18	Geophilomorpha	Schendyla carniolensis Verhoeff, 1902	F	adult	species	preserved specimen	MP	2019	Ivan Kos
BMKR00531	KROK18	Geophilomorpha	Schendyla carniolensis Verhoeff, 1902	F	adult	species	preserved specimen	MP	2019	Ivan Kos
BMKR00532	KROK18	Lithobiomorpha	Lithobius carinthiacus Koren, 1992	F	adult	species	preserved specimen	MP	2019	Ivan Kos
BMKR00533	KROK18	Lithobiomorpha	Lithobius carinthiacus Koren, 1992	M	adult	species	preserved specimen	MP	2019	Ivan Kos
BMKR00534	KROK18	Lithobiomorpha	Lithobius carinthiacus Koren, 1992	M	adult	species	preserved specimen	MP	2019	Ivan Kos
BMKR00535	KROK18	Lithobiomorpha	Lithobius latro Meinert, 1872	M	adult	species	preserved specimen	MP	2019	Ivan Kos
BMKR00536	KROK18	Lithobiomorpha	Lithobius pygmaeus Latzel, 1880	M	adult	species	preserved specimen	MP	2019	Ivan Kos
BMKR00537	KROK18	Lithobiomorpha	Lithobius pygmaeus Latzel, 1880	F	adult	species	preserved specimen	MP	2019	Ivan Kos
BMKR00538	KROK18	Lithobiomorpha	Lithobius pygmaeus Latzel, 1880	M	adult	species	preserved specimen	MP	2019	Ivan Kos
BMKR00539	KROK18	Lithobiomorpha	Lithobius pygmaeus Latzel, 1880	F	adult	species	preserved specimen	MP	2019	Ivan Kos
BMKR00540	KROK18	Lithobiomorpha	Lithobius pygmaeus Latzel, 1880	F	adult	species	preserved specimen	MP	2019	Ivan Kos
BMKR00541	KROK18	Lithobiomorpha	Lithobius pygmaeus Latzel, 1880	F	adult	species	preserved specimen	MP	2019	Ivan Kos
BMKR00542	KROK18	Lithobiomorpha	Lithobius pygmaeus Latzel, 1880	F	adult	species	preserved specimen	MP	2019	Ivan Kos
BMKR00543	KROK18	Scolopendromorpha	Cryptops hortensis Donovan, 1810			species	preserved specimen	MP	2019	Ivan Kos
BMKR00544	KROK18	Scolopendromorpha	Cryptops hortensis Donovan, 1810			species	preserved specimen	MP	2019	Ivan Kos
BMKR00545	KROK18	Scolopendromorpha	Cryptops parisi Brölemann, 1920			species	preserved specimen	MP	2019	Ivan Kos
BMKR00546	KROK18	Scolopendromorpha	Cryptops parisi Brölemann, 1920			species	preserved specimen	MP	2019	Ivan Kos
BMKR00547	KROK18	Scolopendromorpha	Cryptops parisi Brölemann, 1920			species	preserved specimen	MP	2019	Ivan Kos
BMKR00548	KROK18	Scolopendromorpha	Cryptops rucneri Matic, 1967			species	preserved specimen	MP	2019	Ivan Kos
BMKR00549	KROK18	Scolopendromorpha	Cryptops rucneri Matic, 1967			species	preserved specimen	MP	2019	Ivan Kos
BMKR00550	KROK18	Araneae	Aulonia albimana (Walckenaer, 1805)	M	subadult	species	preserved specimen	AP	2019	Žan Kuralt
BMKR00551	KROK19	Lithobiomorpha	Lithobius dentatus C.L.Koch, 1844	F	adult	species	preserved specimen	AP	2019	Ivan Kos
BMKR00552	KROK27	Lithobiomorpha	Lithobius dentatus C.L.Koch, 1844	M	adult	species	preserved specimen	AP	2019	Ivan Kos	KROK104-20	OL874961
BMKR00553	KROK18	Araneae	Centromerus silvicola (Kulczynski, 1887)	F	adult	species	preserved specimen	AP	2019	Žan Kuralt
BMKR00554	KROK18	Araneae	Centromerus silvicola (Kulczynski, 1887)	F	adult	species	preserved specimen	AP	2019	Žan Kuralt
BMKR00555	KROK18	Araneae	Comaroma simoni Bertkau, 1889	M	adult	species	preserved specimen	AP	2019	Žan Kuralt
BMKR00556	KROK18	Araneae	Comaroma simoni Bertkau, 1889	F	adult	species	preserved specimen	AP	2019	Žan Kuralt
BMKR00557	KROK18	Araneae	Comaroma simoni Bertkau, 1889	M	adult	species	preserved specimen	AP	2019	Žan Kuralt
BMKR00558	KROK18	Araneae	Comaroma simoni Bertkau, 1889	F	adult	species	preserved specimen	AP	2019	Žan Kuralt
BMKR00559	KROK18	Araneae	Comaroma simoni Bertkau, 1889	F	adult	species	preserved specimen	AP	2019	Žan Kuralt
BMKR00560	KROK18	Araneae	Comaroma simoni Bertkau, 1889	F	adult	species	preserved specimen	AP	2019	Žan Kuralt
BMKR00561	KROK18	Araneae	Comaroma simoni Bertkau, 1889	F	subadult	species	preserved specimen	AP	2019	Žan Kuralt
BMKR00562	KROK09	Lithobiomorpha	Lithobius latro Meinert, 1872	M	adult	species	preserved specimen	AP	2019	Ivan Kos
BMKR00563	KROK09	Lithobiomorpha	Lithobius latro Meinert, 1872	F	adult	species	preserved specimen	AP	2019	Ivan Kos	KROK105-20	OL874962
BMKR00564	KROK09	Lithobiomorpha	Lithobius latro Meinert, 1872	M	adult	species	preserved specimen	AP	2019	Ivan Kos
BMKR00565	KROK18	Geophilomorpha	Clinopodes carinthiacus (Latzel,1880)	M	adult	species	preserved specimen	AP	2019	Ivan Kos
BMKR00566	KROK18	Geophilomorpha	Clinopodes carinthiacus (Latzel,1880)		juvenile	species	preserved specimen	AP	2019	Ivan Kos
BMKR00567	KROK18	Geophilomorpha	Dicellophilus carniolensis (C.L. Koch, 1847)	M	adult	species	preserved specimen	AP	2019	Ivan Kos
BMKR00568	KROK18	Geophilomorpha	Dicellophilus carniolensis (C.L. Koch, 1847)			species	preserved specimen	AP	2019	Ivan Kos
BMKR00569	KROK18	Geophilomorpha	Schendyla armata Brölemann, 1901	M	adult	species	preserved specimen	AP	2019	Ivan Kos
BMKR00570	KROK18	Geophilomorpha	Schendyla armata Brölemann, 1901	F	adult	species	preserved specimen	AP	2019	Ivan Kos
BMKR00571	KROK18	Geophilomorpha	Schendyla carniolensis Verhoeff, 1902	M	adult	species	preserved specimen	AP	2019	Ivan Kos
BMKR00572	KROK18	Geophilomorpha	Schendyla tyrolensis Meinert, 1870	M	adult	species	preserved specimen	AP	2019	Ivan Kos
BMKR00573	KROK18	Geophilomorpha	Schendyla tyrolensis Meinert, 1870	M	adult	species	preserved specimen	AP	2019	Ivan Kos
BMKR00574	KROK18	Geophilomorpha	Stenotaenia sorrentina Attems, 1903	F	adult	species	preserved specimen	AP	2019	Ivan Kos
BMKR00575	KROK18	Geophilomorpha	Strigamia acuminata (Leach, 1814)	M	adult	species	preserved specimen	AP	2019	Ivan Kos
BMKR00576	KROK18	Geophilomorpha	Strigamia acuminata (Leach, 1814)	M	adult	species	preserved specimen	AP	2019	Ivan Kos
BMKR00577	KROK18	Geophilomorpha	Strigamia acuminata (Leach, 1814)	M	adult	species	preserved specimen	AP	2019	Ivan Kos
BMKR00578	KROK18	Geophilomorpha	Strigamia acuminata (Leach, 1814)	F	adult	species	preserved specimen	AP	2019	Ivan Kos
BMKR00579	KROK18	Geophilomorpha	Strigamia acuminata (Leach, 1814)	M	adult	species	preserved specimen	AP	2019	Ivan Kos
BMKR00580	KROK18	Geophilomorpha	Strigamia acuminata (Leach, 1814)	F	adult	species	preserved specimen	AP	2019	Ivan Kos
BMKR00581	KROK18	Geophilomorpha	Strigamia acuminata (Leach, 1814)	F	adult	species	preserved specimen	AP	2019	Ivan Kos
BMKR00582	KROK18	Geophilomorpha	Strigamia acuminata (Leach, 1814)			species	preserved specimen	AP	2019	Ivan Kos
BMKR00583	KROK19	Lithobiomorpha	Lithobius latro Meinert, 1872	M	adult	species	preserved specimen	AP	2019	Ivan Kos	KROK039-19	MT994118
BMKR00584	KROK18	Geophilomorpha	Strigamia acuminata (Leach, 1814)	F	adult	species	preserved specimen	AP	2019	Ivan Kos
BMKR00585	KROK18	Geophilomorpha	Strigamia acuminata (Leach, 1814)	M	adult	species	preserved specimen	AP	2019	Ivan Kos
BMKR00586	KROK18	Geophilomorpha	Strigamia acuminata (Leach, 1814)	F	adult	species	preserved specimen	AP	2019	Ivan Kos
BMKR00587	KROK18	Geophilomorpha	Strigamia acuminata (Leach, 1814)	M	adult	species	preserved specimen	AP	2019	Ivan Kos
BMKR00588	KROK18	Geophilomorpha	Strigamia acuminata (Leach, 1814)	F	adult	species	preserved specimen	AP	2019	Ivan Kos
BMKR00589	KROK18	Geophilomorpha	Strigamia acuminata (Leach, 1814)	M	adult	species	preserved specimen	AP	2019	Ivan Kos
BMKR00590	KROK18	Geophilomorpha	Strigamia acuminata (Leach, 1814)	F	adult	species	preserved specimen	AP	2019	Ivan Kos
BMKR00591	KROK29	Lithobiomorpha	Lithobius latro Meinert, 1872	F	adult	species	preserved specimen	AP	2019	Ivan Kos
BMKR00592	KROK18	Geophilomorpha	Strigamia transsilvanica Verhoeff, 1928	F	adult	species	preserved specimen	AP	2019	Ivan Kos
BMKR00593	KROK18	Geophilomorpha	Dicellophilus carniolensis (C.L. Koch, 1847)		juvenile	species	preserved specimen	AP	2019	Ivan Kos
BMKR00594	KROK18	Lithobiomorpha	Lithobius carinthiacus Koren, 1992	F	adult	species	preserved specimen	AP	2019	Ivan Kos
BMKR00595	KROK18	Lithobiomorpha	Lithobius carinthiacus Koren, 1992	F	adult	species	preserved specimen	AP	2019	Ivan Kos
BMKR00596	KROK18	Lithobiomorpha	Lithobius pygmaeus Latzel, 1880	M	adult	species	preserved specimen	AP	2019	Ivan Kos
BMKR00597	KROK18	Lithobiomorpha	Lithobius pygmaeus Latzel, 1880	F	adult	species	preserved specimen	AP	2019	Ivan Kos
BMKR00598	KROK18	Lithobiomorpha	Lithobius pygmaeus Latzel, 1880	F	adult	species	preserved specimen	AP	2019	Ivan Kos
BMKR00599	KROK18	Lithobiomorpha	Lithobius pygmaeus Latzel, 1880	M	adult	species	preserved specimen	AP	2019	Ivan Kos
BMKR00600	KROK18	Lithobiomorpha	Lithobius pygmaeus Latzel, 1880	F	adult	species	preserved specimen	AP	2019	Ivan Kos
BMKR00601	KROK18	Lithobiomorpha	Lithobius pygmaeus Latzel, 1880	M	adult	species	preserved specimen	AP	2019	Ivan Kos
BMKR00602	KROK18	Lithobiomorpha	Lithobius pygmaeus Latzel, 1880	M	adult	species	preserved specimen	AP	2019	Ivan Kos
BMKR00603	KROK18	Lithobiomorpha	Lithobius pygmaeus Latzel, 1880	F	adult	species	preserved specimen	AP	2019	Ivan Kos
BMKR00604	KROK18	Lithobiomorpha	Lithobius pygmaeus Latzel, 1880	F	adult	species	preserved specimen	AP	2019	Ivan Kos
BMKR00605	KROK18	Lithobiomorpha	Lithobius pygmaeus Latzel, 1880	M	adult	species	preserved specimen	AP	2019	Ivan Kos
BMKR00606	KROK18	Lithobiomorpha	Lithobius pygmaeus Latzel, 1880	F	adult	species	preserved specimen	AP	2019	Ivan Kos
BMKR00607	KROK18	Lithobiomorpha	Lithobius pygmaeus Latzel, 1880	F	adult	species	preserved specimen	AP	2019	Ivan Kos
BMKR00608	KROK18	Lithobiomorpha	Lithobius pygmaeus Latzel, 1880	M	adult	species	preserved specimen	AP	2019	Ivan Kos
BMKR00609	KROK18	Lithobiomorpha	Lithobius pygmaeus Latzel, 1880	F	adult	species	preserved specimen	AP	2019	Ivan Kos
BMKR00610	KROK18	Lithobiomorpha	Lithobius pygmaeus Latzel, 1880	M	adult	species	preserved specimen	AP	2019	Ivan Kos
BMKR00611	KROK18	Lithobiomorpha	Lithobius pygmaeus Latzel, 1880	M	adult	species	preserved specimen	AP	2019	Ivan Kos
BMKR00612	KROK18	Lithobiomorpha	Lithobius pygmaeus Latzel, 1880	F	adult	species	preserved specimen	AP	2019	Ivan Kos
BMKR00613	KROK18	Lithobiomorpha	Lithobius pygmaeus Latzel, 1880	M	adult	species	preserved specimen	AP	2019	Ivan Kos
BMKR00614	KROK18	Scolopendromorpha	Cryptops parisi Brölemann, 1920			species	preserved specimen	AP	2019	Ivan Kos
BMKR00615	KROK31	Lithobiomorpha	Lithobius latro Meinert, 1872	F	adult	species	preserved specimen	AP	2019	Ivan Kos
BMKR00616	KROK19	Araneae	Centrophantes roeweri (Wiehle, 1961)	F	adult	species	preserved specimen	AP	2019	Žan Kuralt
BMKR00617	KROK19	Araneae	Comaroma simoni Bertkau, 1889	F	adult	species	preserved specimen	AP	2019	Žan Kuralt
BMKR00618	KROK11	Lithobiomorpha	Lithobius nodulipes Latzel, 1880	M	adult	species	preserved specimen	AP	2019	Ivan Kos
BMKR00619	KROK19	Araneae	Microneta viaria (Blackwall, 1841)	F	adult	species	preserved specimen	AP	2019	Žan Kuralt
BMKR00620	KROK19	Araneae	Microneta viaria (Blackwall, 1841)	F	adult	species	preserved specimen	AP	2019	Žan Kuralt
BMKR00621	KROK19	Araneae	Microneta viaria (Blackwall, 1841)	F	adult	species	preserved specimen	AP	2019	Žan Kuralt
BMKR00622	KROK19	Araneae	Microneta viaria (Blackwall, 1841)	F	adult	species	preserved specimen	AP	2019	Žan Kuralt
BMKR00623	KROK19	Araneae	Microneta viaria (Blackwall, 1841)	F	adult	species	preserved specimen	AP	2019	Žan Kuralt
BMKR00624	KROK19	Araneae	Microneta viaria (Blackwall, 1841)	M	adult	species	preserved specimen	AP	2019	Žan Kuralt
BMKR00625	KROK19	Araneae	Microneta viaria (Blackwall, 1841)	M	adult	species	preserved specimen	AP	2019	Žan Kuralt
BMKR00626	KROK19	Lithobiomorpha	Lithobius latro Meinert, 1872	F	adult	species	preserved specimen	AP	2019	Ivan Kos
BMKR00627	KROK19	Geophilomorpha	Strigamia acuminata (Leach, 1814)	F	adult	species	preserved specimen	AP	2019	Ivan Kos
BMKR00628	KROK17	Lithobiomorpha	Lithobius pygmaeus Latzel, 1880			species	preserved specimen	AP	2019	Ivan Kos
BMKR00629	KROK14	Lithobiomorpha	Lithobius pygmaeus Latzel, 1880	M	adult	species	preserved specimen	AP	2019	Ivan Kos
BMKR00630	KROK14	Lithobiomorpha	Lithobius pygmaeus Latzel, 1880	F	adult	species	preserved specimen	AP	2019	Ivan Kos
BMKR00631	KROK17	Lithobiomorpha	Lithobius pygmaeus Latzel, 1880			species	preserved specimen	AP	2019	Ivan Kos
BMKR00632	KROK16	Lithobiomorpha	Lithobius pygmaeus Latzel, 1880	F	adult	species	preserved specimen	AP	2019	Ivan Kos
BMKR00633	KROK16	Lithobiomorpha	Lithobius pygmaeus Latzel, 1880	F	adult	species	preserved specimen	AP	2019	Ivan Kos
BMKR00634	KROK19	Lithobiomorpha	Lithobius pygmaeus Latzel, 1880	M	adult	species	preserved specimen	AP	2019	Ivan Kos
BMKR00635	KROK19	Scolopendromorpha	Cryptops parisi Brölemann, 1920			species	preserved specimen	MP	2019	Ivan Kos
BMKR00636	KROK19	Scolopendromorpha	Cryptops parisi Brölemann, 1920			species	preserved specimen	MP	2019	Ivan Kos
BMKR00637	KROK20	Araneae	Amaurobius obustus L. Koch, 1868	F	adult	species	preserved specimen	AP	2019	Žan Kuralt
BMKR00638	KROK20	Araneae	Metellina segmentata (Clerck, 1757)		juvenile	species	preserved specimen	AP	2019	Žan Kuralt
BMKR00639	KROK20	Araneae	Microneta viaria (Blackwall, 1841)	F	adult	species	preserved specimen	AP	2019	Žan Kuralt
BMKR00640	KROK20	Araneae	Microneta viaria (Blackwall, 1841)	F	adult	species	preserved specimen	AP	2019	Žan Kuralt
BMKR00641	KROK20	Araneae	Microneta viaria (Blackwall, 1841)	M	adult	species	preserved specimen	AP	2019	Žan Kuralt
BMKR00642	KROK20	Araneae	Microneta viaria (Blackwall, 1841)	M	adult	species	preserved specimen	AP	2019	Žan Kuralt
BMKR00643	KROK20	Araneae	Microneta viaria (Blackwall, 1841)	M	adult	species	preserved specimen	AP	2019	Žan Kuralt
BMKR00644	KROK20	Araneae	Microneta viaria (Blackwall, 1841)	M	subadult	species	preserved specimen	AP	2019	Žan Kuralt
BMKR00645	KROK20	Araneae	Tenuiphantes tenebricola (Wider, 1834)	F	adult	species	preserved specimen	AP	2019	Žan Kuralt
BMKR00646	KROK26	Lithobiomorpha	Lithobius tenebrosus Meinert, 1872	M	adult	species	preserved specimen	AP	2019	Ivan Kos	KROK041-19	MT994120
BMKR00647	KROK20	Geophilomorpha	Strigamia acuminata (Leach, 1814)	F	adult	species	preserved specimen	AP	2019	Ivan Kos
BMKR00648	KROK09	Lithobiomorpha	Lithobius validus Meinert, 1872	F	adult	species	preserved specimen	AP	2019	Ivan Kos	KROK042-19	MT994121
BMKR00649	KROK09	Lithobiomorpha	Lithobius validus Meinert, 1872	F	adult	species	preserved specimen	AP	2019	Ivan Kos	KROK106-20	OL874966
BMKR00650	KROK16	Lithobiomorpha	Lithobius anici sp.n.	F	adult	species	preserved specimen	AP	2019	Ivan Kos	KROK043-19	MT994141
BMKR00651	KROK29	Lithobiomorpha	Lithobius anici sp.n.	M	adult	species	preserved specimen	AP	2019	Ivan Kos
BMKR00652	KROK20	Scolopendromorpha	Cryptops rucneri Matic, 1967			species	preserved specimen	MP	2019	Ivan Kos
BMKR00653	KROK21	Lithobiomorpha	Lithobius carinthiacus Koren, 1992	M	adult	species	preserved specimen	MP	2019	Ivan Kos
BMKR00654	KROK21	Lithobiomorpha	Lithobius pygmaeus Latzel, 1880	F	adult	species	preserved specimen	MP	2019	Ivan Kos
BMKR00655	KROK21	Scolopendromorpha	Cryptops hortensis Donovan, 1810			species	preserved specimen	MP	2019	Ivan Kos
BMKR00656	KROK21	Scolopendromorpha	Cryptops hortensis Donovan, 1810			species	preserved specimen	MP	2019	Ivan Kos
BMKR00657	KROK21	Scolopendromorpha	Cryptops hortensis Donovan, 1810			species	preserved specimen	MP	2019	Ivan Kos
BMKR00658	KROK21	Scolopendromorpha	Cryptops hortensis Donovan, 1810			species	preserved specimen	MP	2019	Ivan Kos
BMKR00659	KROK21	Scolopendromorpha	Cryptops hortensis Donovan, 1810			species	preserved specimen	MP	2019	Ivan Kos
BMKR00660	KROK31	Lithobiomorpha	Lithobius anici sp.n.	F	adult	species	preserved specimen	AP	2019	Ivan Kos
BMKR00661	KROK31	Lithobiomorpha	Lithobius anici sp.n.	M	adult	species	preserved specimen	AP	2019	Ivan Kos
BMKR00662	KROK32	Lithobiomorpha	Lithobius anici sp.n.	F	adult	species	preserved specimen	AP	2019	Ivan Kos
BMKR00663	KROK21	Araneae	Diplocephalus picinus (Blackwall, 1841)	M	adult	species	preserved specimen	AP	2019	Žan Kuralt
BMKR00664	KROK21	Araneae	Diplocephalus picinus (Blackwall, 1841)	M	adult	species	preserved specimen	AP	2019	Žan Kuralt
BMKR00665	KROK21	Araneae	Mermessus trilobatus (Emerton, 1882)	M	subadult	species	preserved specimen	AP	2019	Žan Kuralt
BMKR00666	KROK21	Araneae	Mermessus trilobatus (Emerton, 1882)		juvenile	species	preserved specimen	AP	2019	Žan Kuralt
BMKR00667	KROK17	Lithobiomorpha	Lithobius carinthiacus Koren, 1992			species	preserved specimen	AP	2019	Ivan Kos	KROK044-19	MT994112
BMKR00668	KROK21	Araneae	Microneta viaria (Blackwall, 1841)	F	adult	species	preserved specimen	AP	2019	Žan Kuralt
BMKR00669	KROK21	Araneae	Microneta viaria (Blackwall, 1841)	F	adult	species	preserved specimen	AP	2019	Žan Kuralt
BMKR00670	KROK21	Araneae	Microneta viaria (Blackwall, 1841)	F	adult	species	preserved specimen	AP	2019	Žan Kuralt
BMKR00671	KROK21	Araneae	Microneta viaria (Blackwall, 1841)	M	adult	species	preserved specimen	AP	2019	Žan Kuralt
BMKR00672	KROK21	Araneae	Microneta viaria (Blackwall, 1841)	M	adult	species	preserved specimen	AP	2019	Žan Kuralt
BMKR00673	KROK31	Lithobiomorpha	Lithobius carinthiacus Koren, 1992	M	adult	species	preserved specimen	AP	2019	Ivan Kos
BMKR00674	KROK21	Geophilomorpha	Strigamia acuminata (Leach, 1814)	M	adult	species	preserved specimen	AP	2019	Ivan Kos
BMKR00675	KROK21	Geophilomorpha	Strigamia acuminata (Leach, 1814)	M	adult	species	preserved specimen	AP	2019	Ivan Kos
BMKR00676	KROK21	Geophilomorpha	Strigamia acuminata (Leach, 1814)	M	adult	species	preserved specimen	AP	2019	Ivan Kos
BMKR00677	KROK21	Geophilomorpha	Strigamia acuminata (Leach, 1814)	M	adult	species	preserved specimen	AP	2019	Ivan Kos
BMKR00678	KROK21	Lithobiomorpha	Eupolybothrus tridentinus (Fanzago, 1874)		juvenile	species	preserved specimen	AP	2019	Ivan Kos
BMKR00679	KROK21	Lithobiomorpha	Lithobius dentatus C.L.Koch, 1844	F	adult	species	preserved specimen	AP	2019	Ivan Kos
BMKR00680	KROK21	Lithobiomorpha	Lithobius dentatus C.L.Koch, 1844	M	adult	species	preserved specimen	AP	2019	Ivan Kos
BMKR00681	KROK31	Lithobiomorpha	Lithobius latro Meinert, 1872	F	adult	species	preserved specimen	AP	2019	Ivan Kos
BMKR00682	KROK20	Lithobiomorpha	Lithobius pygmaeus Latzel, 1880	F	adult	species	preserved specimen	AP	2019	Ivan Kos
BMKR00683	KROK26	Araneae	Tenuiphantes tenebricola (Wider, 1834)	F	adult	species	preserved specimen	AP	2019	Žan Kuralt
BMKR00684	KROK50	Lithobiomorpha	Lithobius nodulipes Latzel, 1880	F	adult	species	preserved specimen	AP	2019	Ivan Kos
BMKR00685	KROK58	Lithobiomorpha	Lithobius dentatus C.L.Koch, 1844	F	adult	species	preserved specimen	AP	2019	Ivan Kos	KROK046-19	MT994115
BMKR00686	KROK50	Lithobiomorpha	Lithobius castaneus Newport, 1844	F	adult	species	preserved specimen	AP	2019	Ivan Kos
BMKR00687	KROK28	Geophilomorpha	Schendyla armata Brölemann, 1901	F	adult	species	preserved specimen	MP	2019	Ivan Kos
BMKR00688	KROK28	Geophilomorpha	Schendyla tyrolensis Meinert, 1870	F	adult	species	preserved specimen	MP	2019	Ivan Kos
BMKR00689	KROK28	Lithobiomorpha	Lithobius pygmaeus Latzel, 1880	F	adult	species	preserved specimen	MP	2019	Ivan Kos
BMKR00690	KROK28	Lithobiomorpha	Lithobius pygmaeus Latzel, 1880	M	adult	species	preserved specimen	MP	2019	Ivan Kos
BMKR00691	KROK28	Lithobiomorpha	Lithobius pygmaeus Latzel, 1880	F	adult	species	preserved specimen	MP	2019	Ivan Kos
BMKR00692	KROK28	Lithobiomorpha	Lithobius pygmaeus Latzel, 1880	M	adult	species	preserved specimen	MP	2019	Ivan Kos
BMKR00693	KROK28	Lithobiomorpha	Lithobius pygmaeus Latzel, 1880	F	adult	species	preserved specimen	MP	2019	Ivan Kos
BMKR00694	KROK28	Lithobiomorpha	Lithobius pygmaeus Latzel, 1880	F	adult	species	preserved specimen	MP	2019	Ivan Kos
BMKR00695	KROK28	Scolopendromorpha	Cryptops hortensis Donovan, 1810			species	preserved specimen	MP	2019	Ivan Kos
BMKR00696	KROK28	Scolopendromorpha	Cryptops hortensis Donovan, 1810			species	preserved specimen	MP	2019	Ivan Kos
BMKR00697	KROK28	Scolopendromorpha	Cryptops hortensis Donovan, 1810			species	preserved specimen	MP	2019	Ivan Kos
BMKR00698	KROK28	Scolopendromorpha	Cryptops parisi Brölemann, 1920			species	preserved specimen	MP	2019	Ivan Kos
BMKR00699	KROK28	Scolopendromorpha	Cryptops parisi Brölemann, 1920			species	preserved specimen	MP	2019	Ivan Kos
BMKR00700	KROK28	Araneae	Comaroma simoni Bertkau, 1889	F	adult	species	preserved specimen	AP	2019	Žan Kuralt
BMKR00701	KROK28	Araneae	Comaroma simoni Bertkau, 1889	F	adult	species	preserved specimen	AP	2019	Žan Kuralt
BMKR00702	KROK28	Araneae	Comaroma simoni Bertkau, 1889	M	adult	species	preserved specimen	AP	2019	Žan Kuralt
BMKR00703	KROK28	Araneae	Comaroma simoni Bertkau, 1889	F	adult	species	preserved specimen	AP	2019	Žan Kuralt
BMKR00704	KROK28	Araneae	Comaroma simoni Bertkau, 1889	F	adult	species	preserved specimen	AP	2019	Žan Kuralt
BMKR00705	KROK28	Araneae	Comaroma simoni Bertkau, 1889	F	adult	species	preserved specimen	AP	2019	Žan Kuralt
BMKR00706	KROK28	Geophilomorpha	Eurygeophilus pinguis (Brölemann, 1898)	F	adult	species	preserved specimen	AP	2019	Ivan Kos
BMKR00707	KROK41	Lithobiomorpha	Lithobius forficatus (Linnaeus, 1758)	F	adult	species	preserved specimen	AP	2019	Ivan Kos	KROK047-19	MT994117
BMKR00708	KROK28	Geophilomorpha	Schendyla carniolensis Verhoeff, 1902	F	adult	species	preserved specimen	AP	2019	Ivan Kos
BMKR00709	KROK28	Geophilomorpha	Schendyla carniolensis Verhoeff, 1902	M	adult	species	preserved specimen	AP	2019	Ivan Kos
BMKR00710	KROK28	Geophilomorpha	Schendyla carniolensis Verhoeff, 1902	F	adult	species	preserved specimen	AP	2019	Ivan Kos
BMKR00711	KROK71	Lithobiomorpha	Eupolybothrus grossipes (C. L. Koch, 1847)	M	adult	species	preserved specimen	AP	2019	Ivan Kos	KROK048-19	MT994099
BMKR00712	KROK33	Lithobiomorpha	Lithobius carinthiacus Koren, 1992	F	adult	species	preserved specimen	AP	2019	Ivan Kos
BMKR00713	KROK28	Geophilomorpha	Schendyla tyrolensis Meinert, 1870		juvenile	species	preserved specimen	MP	2019	Ivan Kos
BMKR00714	KROK28	Geophilomorpha	Stenotaenia sorrentina Attems, 1903	M	adult	species	preserved specimen	AP	2019	Ivan Kos
BMKR00715	KROK28	Geophilomorpha	Strigamia acuminata (Leach, 1814)	F	adult	species	preserved specimen	AP	2019	Ivan Kos
BMKR00716	KROK28	Geophilomorpha	Strigamia acuminata (Leach, 1814)	F	adult	species	preserved specimen	AP	2019	Ivan Kos
BMKR00717	KROK28	Geophilomorpha	Strigamia acuminata (Leach, 1814)	F	adult	species	preserved specimen	AP	2019	Ivan Kos
BMKR00718	KROK28	Geophilomorpha	Strigamia acuminata (Leach, 1814)	F	adult	species	preserved specimen	AP	2019	Ivan Kos
BMKR00719	KROK28	Geophilomorpha	Strigamia transsilvanica Verhoeff, 1928	M	adult	species	preserved specimen	AP	2019	Ivan Kos
BMKR00720	KROK28	Geophilomorpha	Strigamia transsilvanica Verhoeff, 1928	M	adult	species	preserved specimen	AP	2019	Ivan Kos
BMKR00721	KROK28	Lithobiomorpha	Lithobius pygmaeus Latzel, 1880	M	adult	species	preserved specimen	AP	2019	Ivan Kos
BMKR00722	KROK28	Lithobiomorpha	Lithobius pygmaeus Latzel, 1880	M	adult	species	preserved specimen	AP	2019	Ivan Kos
BMKR00723	KROK28	Lithobiomorpha	Lithobius pygmaeus Latzel, 1880	M	adult	species	preserved specimen	AP	2019	Ivan Kos
BMKR00724	KROK28	Lithobiomorpha	Lithobius pygmaeus Latzel, 1880	M	adult	species	preserved specimen	AP	2019	Ivan Kos
BMKR00725	KROK28	Lithobiomorpha	Lithobius pygmaeus Latzel, 1880	F	adult	species	preserved specimen	MP	2019	Ivan Kos
BMKR00726	KROK28	Lithobiomorpha	Lithobius pygmaeus Latzel, 1880	M	adult	species	preserved specimen	MP	2019	Ivan Kos
BMKR00727	KROK28	Lithobiomorpha	Lithobius pygmaeus Latzel, 1880	M	adult	species	preserved specimen	MP	2019	Ivan Kos
BMKR00728	KROK28	Lithobiomorpha	Lithobius pygmaeus Latzel, 1880	F	adult	species	preserved specimen	MP	2019	Ivan Kos
BMKR00729	KROK28	Scolopendromorpha	Cryptops hortensis Donovan, 1810			species	preserved specimen	MP	2019	Ivan Kos
BMKR00730	KROK28	Scolopendromorpha	Cryptops hortensis Donovan, 1810			species	preserved specimen	MP	2019	Ivan Kos
BMKR00731	KROK28	Scolopendromorpha	Cryptops hortensis Donovan, 1810			species	preserved specimen	MP	2019	Ivan Kos
BMKR00732	KROK28	Scolopendromorpha	Cryptops hortensis Donovan, 1810			species	preserved specimen	MP	2019	Ivan Kos
BMKR00733	KROK28	Scolopendromorpha	Cryptops hortensis Donovan, 1810			species	preserved specimen	MP	2019	Ivan Kos
BMKR00734	KROK28	Scolopendromorpha	Cryptops hortensis Donovan, 1810			species	preserved specimen	MP	2019	Ivan Kos
BMKR00735	KROK28	Scolopendromorpha	Cryptops rucneri Matic, 1967			species	preserved specimen	MP	2019	Ivan Kos
BMKR00736	KROK29	Geophilomorpha	Geophilus alpinus Meinert, 1870	F	adult	species	preserved specimen	MP	2019	Ivan Kos
BMKR00737	KROK29	Geophilomorpha	Schendyla armata Brölemann, 1901		juvenile	species	preserved specimen	MP	2019	Ivan Kos
BMKR00738	KROK29	Geophilomorpha	Schendyla armata Brölemann, 1901		juvenile	species	preserved specimen	MP	2019	Ivan Kos
BMKR00739	KROK29	Geophilomorpha	Schendyla tyrolensis Meinert, 1870		juvenile	species	preserved specimen	MP	2019	Ivan Kos
BMKR00740	KROK29	Geophilomorpha	Schendyla tyrolensis Meinert, 1870		juvenile	species	preserved specimen	MP	2019	Ivan Kos
BMKR00741	KROK29	Geophilomorpha	Schendyla tyrolensis Meinert, 1870		juvenile	species	preserved specimen	MP	2019	Ivan Kos
BMKR00742	KROK29	Lithobiomorpha	Lithobius pygmaeus Latzel, 1880	F	adult	species	preserved specimen	MP	2019	Ivan Kos
BMKR00743	KROK29	Lithobiomorpha	Lithobius pygmaeus Latzel, 1880	M	adult	species	preserved specimen	MP	2019	Ivan Kos
BMKR00744	KROK29	Lithobiomorpha	Lithobius pygmaeus Latzel, 1880	M	adult	species	preserved specimen	MP	2019	Ivan Kos
BMKR00745	KROK29	Lithobiomorpha	Lithobius pygmaeus Latzel, 1880	M	adult	species	preserved specimen	MP	2019	Ivan Kos
BMKR00746	KROK29	Lithobiomorpha	Lithobius pygmaeus Latzel, 1880	M	adult	species	preserved specimen	MP	2019	Ivan Kos
BMKR00747	KROK29	Lithobiomorpha	Lithobius pygmaeus Latzel, 1880	F	adult	species	preserved specimen	MP	2019	Ivan Kos
BMKR00748	KROK29	Lithobiomorpha	Lithobius pygmaeus Latzel, 1880	F	adult	species	preserved specimen	MP	2019	Ivan Kos
BMKR00749	KROK29	Lithobiomorpha	Lithobius pygmaeus Latzel, 1880	M	adult	species	preserved specimen	MP	2019	Ivan Kos
BMKR00750	KROK29	Lithobiomorpha	Lithobius pygmaeus Latzel, 1880	F	adult	species	preserved specimen	MP	2019	Ivan Kos
BMKR00751	KROK29	Scolopendromorpha	Cryptops hortensis Donovan, 1810			species	preserved specimen	MP	2019	Ivan Kos
BMKR00752	KROK29	Scolopendromorpha	Cryptops hortensis Donovan, 1810			species	preserved specimen	MP	2019	Ivan Kos
BMKR00753	KROK29	Scolopendromorpha	Cryptops hortensis Donovan, 1810			species	preserved specimen	MP	2019	Ivan Kos
BMKR00754	KROK29	Scolopendromorpha	Cryptops hortensis Donovan, 1810			species	preserved specimen	MP	2019	Ivan Kos
BMKR00755	KROK29	Scolopendromorpha	Cryptops parisi Brölemann, 1920			species	preserved specimen	MP	2019	Ivan Kos
BMKR00756	KROK29	Scolopendromorpha	Cryptops parisi Brölemann, 1920			species	preserved specimen	MP	2019	Ivan Kos
BMKR00757	KROK29	Araneae	Amaurobius obustus L. Koch, 1868	F	adult	species	preserved specimen	AP	2019	Žan Kuralt
BMKR00758	KROK61	Lithobiomorpha	Lithobius tenebrosus Meinert, 1872	F	adult	species	preserved specimen	AP	2019	Ivan Kos	KROK108-20	OL874965
BMKR00759	KROK33	Lithobiomorpha	Lithobius latro Meinert, 1872	M	adult	species	preserved specimen	AP	2019	Ivan Kos	KROK109-20	OL874963
BMKR00760	KROK29	Araneae	Comaroma simoni Bertkau, 1889	F	adult	species	preserved specimen	AP	2019	Žan Kuralt
BMKR00761	KROK29	Araneae	Comaroma simoni Bertkau, 1889	F	adult	species	preserved specimen	AP	2019	Žan Kuralt
BMKR00762	KROK29	Araneae	Comaroma simoni Bertkau, 1889	M	adult	species	preserved specimen	AP	2019	Žan Kuralt
BMKR00763	KROK29	Araneae	Comaroma simoni Bertkau, 1889	F	adult	species	preserved specimen	AP	2019	Žan Kuralt
BMKR00764	KROK29	Araneae	Comaroma simoni Bertkau, 1889	F	adult	species	preserved specimen	AP	2019	Žan Kuralt
BMKR00765	KROK29	Araneae	Comaroma simoni Bertkau, 1889	F	adult	species	preserved specimen	AP	2019	Žan Kuralt
BMKR00766	KROK29	Araneae	Comaroma simoni Bertkau, 1889	F	adult	species	preserved specimen	AP	2019	Žan Kuralt
BMKR00767	KROK29	Araneae	Robertus lividus (Blackwall, 1836)	F	adult	species	preserved specimen	AP	2019	Žan Kuralt
BMKR00768	KROK29	Geophilomorpha	Clinopodes carinthiacus (Latzel,1880)		juvenile	species	preserved specimen	AP	2019	Ivan Kos
BMKR00769	KROK29	Geophilomorpha	Eurygeophilus pinguis (Brölemann, 1898)	M	adult	species	preserved specimen	AP	2019	Ivan Kos
BMKR00770	KROK21	Lithobiomorpha	Lithobius pelidnus Haase, 1880	F	adult	species	preserved specimen	AP	2019	Ivan Kos	KROK111-20	OL874964
BMKR00771	KROK29	Geophilomorpha	Schendyla tyrolensis Meinert, 1870	F	adult	species	preserved specimen	AP	2019	Ivan Kos
BMKR00772	KROK29	Geophilomorpha	Strigamia acuminata (Leach, 1814)	F	adult	species	preserved specimen	AP	2019	Ivan Kos
BMKR00773	KROK29	Geophilomorpha	Strigamia acuminata (Leach, 1814)	M	adult	species	preserved specimen	AP	2019	Ivan Kos
BMKR00774	KROK29	Geophilomorpha	Strigamia acuminata (Leach, 1814)	M	adult	species	preserved specimen	AP	2019	Ivan Kos
BMKR00775	KROK29	Geophilomorpha	Strigamia acuminata (Leach, 1814)	M	adult	species	preserved specimen	AP	2019	Ivan Kos
BMKR00776	KROK29	Geophilomorpha	Strigamia acuminata (Leach, 1814)	F	adult	species	preserved specimen	AP	2019	Ivan Kos
BMKR00777	KROK29	Geophilomorpha	Strigamia acuminata (Leach, 1814)	M	adult	species	preserved specimen	AP	2019	Ivan Kos
BMKR00778	KROK29	Geophilomorpha	Strigamia acuminata (Leach, 1814)	M	adult	species	preserved specimen	AP	2019	Ivan Kos
BMKR00779	KROK29	Geophilomorpha	Strigamia transsilvanica Verhoeff, 1928	F	adult	species	preserved specimen	AP	2019	Ivan Kos
BMKR00780	KROK29	Lithobiomorpha	Lithobius dentatus C.L.Koch, 1844	F	adult	species	preserved specimen	AP	2019	Ivan Kos
BMKR00781	KROK29	Lithobiomorpha	Lithobius pygmaeus Latzel, 1880	F	adult	species	preserved specimen	AP	2019	Ivan Kos
BMKR00782	KROK29	Lithobiomorpha	Lithobius pygmaeus Latzel, 1880	F	adult	species	preserved specimen	MP	2019	Ivan Kos
BMKR00783	KROK29	Lithobiomorpha	Lithobius pygmaeus Latzel, 1880	F	adult	species	preserved specimen	MP	2019	Ivan Kos
BMKR00784	KROK29	Lithobiomorpha	Lithobius pygmaeus Latzel, 1880	M	adult	species	preserved specimen	MP	2019	Ivan Kos
BMKR00785	KROK29	Lithobiomorpha	Lithobius pygmaeus Latzel, 1880	M	adult	species	preserved specimen	MP	2019	Ivan Kos
BMKR00786	KROK29	Lithobiomorpha	Lithobius pygmaeus Latzel, 1880	F	adult	species	preserved specimen	MP	2019	Ivan Kos
BMKR00787	KROK29	Lithobiomorpha	Lithobius pygmaeus Latzel, 1880	F	adult	species	preserved specimen	AP	2019	Ivan Kos
BMKR00788	KROK29	Lithobiomorpha	Lithobius pygmaeus Latzel, 1880	M	adult	species	preserved specimen	AP	2019	Ivan Kos
BMKR00789	KROK29	Lithobiomorpha	Lithobius pygmaeus Latzel, 1880	F	adult	species	preserved specimen	AP	2019	Ivan Kos
BMKR00790	KROK29	Lithobiomorpha	Lithobius pygmaeus Latzel, 1880	F	adult	species	preserved specimen	AP	2019	Ivan Kos
BMKR00791	KROK29	Lithobiomorpha	Lithobius pygmaeus Latzel, 1880	F	adult	species	preserved specimen	AP	2019	Ivan Kos
BMKR00792	KROK29	Lithobiomorpha	Lithobius pygmaeus Latzel, 1880	M	adult	species	preserved specimen	MP	2019	Ivan Kos
BMKR00793	KROK29	Lithobiomorpha	Lithobius pygmaeus Latzel, 1880	F	adult	species	preserved specimen	MP	2019	Ivan Kos
BMKR00794	KROK29	Lithobiomorpha	Lithobius pygmaeus Latzel, 1880	F	adult	species	preserved specimen	MP	2019	Ivan Kos
BMKR00795	KROK29	Lithobiomorpha	Lithobius pygmaeus Latzel, 1880	F	adult	species	preserved specimen	MP	2019	Ivan Kos
BMKR00796	KROK29	Lithobiomorpha	Lithobius tenebrosus Meinert, 1872	M	adult	species	preserved specimen	AP	2019	Ivan Kos
BMKR00797	KROK29	Scolopendromorpha	Cryptops hortensis Donovan, 1810			species	preserved specimen	MP	2019	Ivan Kos
BMKR00798	KROK29	Scolopendromorpha	Cryptops hortensis Donovan, 1810			species	preserved specimen	MP	2019	Ivan Kos
BMKR00799	KROK29	Scolopendromorpha	Cryptops hortensis Donovan, 1810			species	preserved specimen	MP	2019	Ivan Kos
BMKR00800	KROK29	Scolopendromorpha	Cryptops hortensis Donovan, 1810			species	preserved specimen	MP	2019	Ivan Kos
BMKR00801	KROK29	Scolopendromorpha	Cryptops hortensis Donovan, 1810			species	preserved specimen	MP	2019	Ivan Kos
BMKR00802	KROK29	Scolopendromorpha	Cryptops hortensis Donovan, 1810			species	preserved specimen	MP	2019	Ivan Kos
BMKR00803	KROK29	Scolopendromorpha	Cryptops hortensis Donovan, 1810			species	preserved specimen	MP	2019	Ivan Kos
BMKR00804	KROK29	Scolopendromorpha	Cryptops parisi Brölemann, 1920			species	preserved specimen	AP	2019	Ivan Kos
BMKR00805	KROK29	Scolopendromorpha	Cryptops parisi Brölemann, 1920			species	preserved specimen	AP	2019	Ivan Kos
BMKR00806	KROK29	Scolopendromorpha	Cryptops parisi Brölemann, 1920			species	preserved specimen	MP	2019	Ivan Kos
BMKR00807	KROK29	Scolopendromorpha	Cryptops rucneri Matic, 1967			species	preserved specimen	MP	2019	Ivan Kos
BMKR00808	KROK29	Scolopendromorpha	Cryptops rucneri Matic, 1967			species	preserved specimen	MP	2019	Ivan Kos
BMKR00809	KROK30	Geophilomorpha	Geophilus alpinus Meinert, 1870	M	adult	species	preserved specimen	MP	2019	Ivan Kos
BMKR00810	KROK30	Geophilomorpha	Schendyla armata Brölemann, 1901		juvenile	species	preserved specimen	MP	2019	Ivan Kos
BMKR00811	KROK30	Lithobiomorpha	Lithobius pygmaeus Latzel, 1880	M	adult	species	preserved specimen	MP	2019	Ivan Kos
BMKR00812	KROK30	Lithobiomorpha	Lithobius pygmaeus Latzel, 1880	M	adult	species	preserved specimen	MP	2019	Ivan Kos
BMKR00813	KROK30	Lithobiomorpha	Lithobius pygmaeus Latzel, 1880	F	adult	species	preserved specimen	MP	2019	Ivan Kos
BMKR00814	KROK30	Lithobiomorpha	Lithobius pygmaeus Latzel, 1880	F	adult	species	preserved specimen	MP	2019	Ivan Kos
BMKR00815	KROK30	Lithobiomorpha	Lithobius pygmaeus Latzel, 1880	M	adult	species	preserved specimen	MP	2019	Ivan Kos
BMKR00816	KROK30	Lithobiomorpha	Lithobius pygmaeus Latzel, 1880	M	adult	species	preserved specimen	MP	2019	Ivan Kos
BMKR00817	KROK30	Lithobiomorpha	Lithobius pygmaeus Latzel, 1880	M	adult	species	preserved specimen	MP	2019	Ivan Kos
BMKR00818	KROK30	Lithobiomorpha	Lithobius pygmaeus Latzel, 1880	F	adult	species	preserved specimen	MP	2019	Ivan Kos
BMKR00819	KROK30	Lithobiomorpha	Lithobius pygmaeus Latzel, 1880	F	adult	species	preserved specimen	MP	2019	Ivan Kos
BMKR00820	KROK30	Lithobiomorpha	Lithobius pygmaeus Latzel, 1880	M	adult	species	preserved specimen	MP	2019	Ivan Kos
BMKR00821	KROK30	Lithobiomorpha	Lithobius pygmaeus Latzel, 1880	M	adult	species	preserved specimen	MP	2019	Ivan Kos
BMKR00822	KROK30	Lithobiomorpha	Lithobius pygmaeus Latzel, 1880	F	adult	species	preserved specimen	MP	2019	Ivan Kos
BMKR00823	KROK30	Lithobiomorpha	Lithobius pygmaeus Latzel, 1880	F	adult	species	preserved specimen	MP	2019	Ivan Kos
BMKR00824	KROK30	Lithobiomorpha	Lithobius pygmaeus Latzel, 1880	M	adult	species	preserved specimen	MP	2019	Ivan Kos
BMKR00825	KROK30	Lithobiomorpha	Lithobius pygmaeus Latzel, 1880	F	adult	species	preserved specimen	MP	2019	Ivan Kos
BMKR00826	KROK30	Lithobiomorpha	Lithobius pygmaeus Latzel, 1880	F	adult	species	preserved specimen	MP	2019	Ivan Kos
BMKR00827	KROK30	Scolopendromorpha	Cryptops hortensis Donovan, 1810			species	preserved specimen	MP	2019	Ivan Kos
BMKR00828	KROK30	Scolopendromorpha	Cryptops hortensis Donovan, 1810			species	preserved specimen	MP	2019	Ivan Kos
BMKR00829	KROK30	Scolopendromorpha	Cryptops hortensis Donovan, 1810			species	preserved specimen	MP	2019	Ivan Kos
BMKR00830	KROK30	Scolopendromorpha	Cryptops hortensis Donovan, 1810			species	preserved specimen	MP	2019	Ivan Kos
BMKR00831	KROK30	Scolopendromorpha	Cryptops hortensis Donovan, 1810			species	preserved specimen	MP	2019	Ivan Kos
BMKR00832	KROK30	Scolopendromorpha	Cryptops hortensis Donovan, 1810			species	preserved specimen	MP	2019	Ivan Kos
BMKR00833	KROK30	Scolopendromorpha	Cryptops hortensis Donovan, 1810			species	preserved specimen	MP	2019	Ivan Kos
BMKR00834	KROK30	Scolopendromorpha	Cryptops hortensis Donovan, 1810			species	preserved specimen	MP	2019	Ivan Kos
BMKR00835	KROK30	Scolopendromorpha	Cryptops hortensis Donovan, 1810			species	preserved specimen	MP	2019	Ivan Kos
BMKR00836	KROK30	Scolopendromorpha	Cryptops hortensis Donovan, 1810			species	preserved specimen	MP	2019	Ivan Kos
BMKR00837	KROK30	Scolopendromorpha	Cryptops hortensis Donovan, 1810			species	preserved specimen	MP	2019	Ivan Kos
BMKR00838	KROK30	Scolopendromorpha	Cryptops hortensis Donovan, 1810			species	preserved specimen	MP	2019	Ivan Kos
BMKR00839	KROK30	Scolopendromorpha	Cryptops hortensis Donovan, 1810			species	preserved specimen	MP	2019	Ivan Kos
BMKR00840	KROK30	Scolopendromorpha	Cryptops hortensis Donovan, 1810			species	preserved specimen	MP	2019	Ivan Kos
BMKR00841	KROK30	Scolopendromorpha	Cryptops hortensis Donovan, 1810			species	preserved specimen	MP	2019	Ivan Kos
BMKR00842	KROK30	Scolopendromorpha	Cryptops hortensis Donovan, 1810			species	preserved specimen	MP	2019	Ivan Kos
BMKR00843	KROK30	Scolopendromorpha	Cryptops hortensis Donovan, 1810			species	preserved specimen	MP	2019	Ivan Kos
BMKR00844	KROK30	Scolopendromorpha	Cryptops hortensis Donovan, 1810			species	preserved specimen	MP	2019	Ivan Kos
BMKR00845	KROK30	Scolopendromorpha	Cryptops rucneri Matic, 1967			species	preserved specimen	MP	2019	Ivan Kos
BMKR00846	KROK30	Lithobiomorpha	Lithobius anici sp.n.	M	adult	species	preserved specimen	MP	2019	Ivan Kos
BMKR00847	KROK30	Lithobiomorpha	Lithobius anici sp.n.	F	adult	species	preserved specimen	AP	2019	Ivan Kos
BMKR00848	KROK30	Araneae	Comaroma simoni Bertkau, 1889	M	adult	species	preserved specimen	AP	2019	Žan Kuralt
BMKR00849	KROK30	Araneae	Comaroma simoni Bertkau, 1889	M	adult	species	preserved specimen	AP	2019	Žan Kuralt
BMKR00850	KROK30	Araneae	Comaroma simoni Bertkau, 1889	F	adult	species	preserved specimen	AP	2019	Žan Kuralt
BMKR00851	KROK30	Araneae	Comaroma simoni Bertkau, 1889	M	adult	species	preserved specimen	AP	2019	Žan Kuralt
BMKR00852	KROK30	Araneae	Comaroma simoni Bertkau, 1889	F	adult	species	preserved specimen	AP	2019	Žan Kuralt
BMKR00853	KROK30	Araneae	Comaroma simoni Bertkau, 1889	M	adult	species	preserved specimen	AP	2019	Žan Kuralt
BMKR00854	KROK30	Araneae	Comaroma simoni Bertkau, 1889	F	adult	species	preserved specimen	AP	2019	Žan Kuralt
BMKR00855	KROK30	Geophilomorpha	Clinopodes carinthiacus (Latzel,1880)		juvenile	species	preserved specimen	MP	2019	Ivan Kos
BMKR00856	KROK30	Geophilomorpha	Schendyla armata Brölemann, 1901	F	adult	species	preserved specimen	MP	2019	Ivan Kos
BMKR00857	KROK30	Geophilomorpha	Schendyla armata Brölemann, 1901		juvenile	species	preserved specimen	MP	2019	Ivan Kos
BMKR00858	KROK30	Geophilomorpha	Strigamia acuminata (Leach, 1814)	F	adult	species	preserved specimen	AP	2019	Ivan Kos
BMKR00859	KROK30	Geophilomorpha	Strigamia acuminata (Leach, 1814)	F	adult	species	preserved specimen	AP	2019	Ivan Kos
BMKR00860	KROK30	Geophilomorpha	Strigamia acuminata (Leach, 1814)	F	adult	species	preserved specimen	AP	2019	Ivan Kos
BMKR00861	KROK30	Geophilomorpha	Strigamia acuminata (Leach, 1814)	M	adult	species	preserved specimen	AP	2019	Ivan Kos
BMKR00862	KROK30	Geophilomorpha	Strigamia acuminata (Leach, 1814)		juvenile	species	preserved specimen	MP	2019	Ivan Kos
BMKR00863	KROK30	Geophilomorpha	Strigamia acuminata (Leach, 1814)	F	adult	species	preserved specimen	AP	2019	Ivan Kos
BMKR00864	KROK30	Lithobiomorpha	Lithobius latro Meinert, 1872	M	adult	species	preserved specimen	MP	2019	Ivan Kos
BMKR00865	KROK30	Lithobiomorpha	Lithobius pygmaeus Latzel, 1880	M	adult	species	preserved specimen	MP	2019	Ivan Kos
BMKR00866	KROK30	Lithobiomorpha	Lithobius pygmaeus Latzel, 1880	F	adult	species	preserved specimen	AP	2019	Ivan Kos
BMKR00867	KROK30	Lithobiomorpha	Lithobius pygmaeus Latzel, 1880	F	adult	species	preserved specimen	AP	2019	Ivan Kos
BMKR00868	KROK30	Lithobiomorpha	Lithobius pygmaeus Latzel, 1880	F	adult	species	preserved specimen	AP	2019	Ivan Kos
BMKR00869	KROK30	Lithobiomorpha	Lithobius pygmaeus Latzel, 1880	M	adult	species	preserved specimen	AP	2019	Ivan Kos
BMKR00870	KROK30	Lithobiomorpha	Lithobius pygmaeus Latzel, 1880	M	adult	species	preserved specimen	AP	2019	Ivan Kos
BMKR00871	KROK30	Lithobiomorpha	Lithobius pygmaeus Latzel, 1880	F	adult	species	preserved specimen	MP	2019	Ivan Kos
BMKR00872	KROK30	Lithobiomorpha	Lithobius pygmaeus Latzel, 1880	F	adult	species	preserved specimen	MP	2019	Ivan Kos
BMKR00873	KROK30	Lithobiomorpha	Lithobius pygmaeus Latzel, 1880	M	adult	species	preserved specimen	MP	2019	Ivan Kos
BMKR00874	KROK30	Lithobiomorpha	Lithobius pygmaeus Latzel, 1880	M	adult	species	preserved specimen	MP	2019	Ivan Kos
BMKR00875	KROK30	Lithobiomorpha	Lithobius pygmaeus Latzel, 1880	M	adult	species	preserved specimen	AP	2019	Ivan Kos
BMKR00876	KROK30	Lithobiomorpha	Lithobius pygmaeus Latzel, 1880	F	adult	species	preserved specimen	AP	2019	Ivan Kos
BMKR00877	KROK30	Lithobiomorpha	Lithobius pygmaeus Latzel, 1880	F	adult	species	preserved specimen	AP	2019	Ivan Kos
BMKR00878	KROK30	Lithobiomorpha	Lithobius pygmaeus Latzel, 1880	F	adult	species	preserved specimen	AP	2019	Ivan Kos
BMKR00879	KROK30	Scolopendromorpha	Cryptops hortensis Donovan, 1810			species	preserved specimen	AP	2019	Ivan Kos
BMKR00880	KROK30	Scolopendromorpha	Cryptops hortensis Donovan, 1810			species	preserved specimen	MP	2019	Ivan Kos
BMKR00881	KROK30	Scolopendromorpha	Cryptops hortensis Donovan, 1810			species	preserved specimen	MP	2019	Ivan Kos
BMKR00882	KROK30	Scolopendromorpha	Cryptops hortensis Donovan, 1810			species	preserved specimen	MP	2019	Ivan Kos
BMKR00883	KROK30	Scolopendromorpha	Cryptops parisi Brölemann, 1920			species	preserved specimen	AP	2019	Ivan Kos
BMKR00884	KROK30	Scolopendromorpha	Cryptops parisi Brölemann, 1920			species	preserved specimen	AP	2019	Ivan Kos
BMKR00885	KROK30	Scolopendromorpha	Cryptops parisi Brölemann, 1920			species	preserved specimen	AP	2019	Ivan Kos
BMKR00886	KROK31	Geophilomorpha	Schendyla armata Brölemann, 1901		juvenile	species	preserved specimen	MP	2019	Ivan Kos
BMKR00887	KROK31	Geophilomorpha	Schendyla armata Brölemann, 1901	M	adult	species	preserved specimen	MP	2019	Ivan Kos
BMKR00888	KROK31	Geophilomorpha	Schendyla armata Brölemann, 1901		juvenile	species	preserved specimen	MP	2019	Ivan Kos
BMKR00889	KROK31	Geophilomorpha	Schendyla armata Brölemann, 1901		juvenile	species	preserved specimen	MP	2019	Ivan Kos
BMKR00890	KROK31	Araneae	Comaroma simoni Bertkau, 1889	F	adult	species	preserved specimen	AP	2019	Žan Kuralt
BMKR00891	KROK31	Araneae	Comaroma simoni Bertkau, 1889	F	adult	species	preserved specimen	AP	2019	Žan Kuralt
BMKR00892	KROK31	Araneae	Comaroma simoni Bertkau, 1889	M	adult	species	preserved specimen	AP	2019	Žan Kuralt
BMKR00893	KROK31	Araneae	Comaroma simoni Bertkau, 1889	M	adult	species	preserved specimen	AP	2019	Žan Kuralt
BMKR00894	KROK31	Araneae	Comaroma simoni Bertkau, 1889	M	adult	species	preserved specimen	AP	2019	Žan Kuralt
BMKR00895	KROK14	Scolopendromorpha	Cryptops parisi Brölemann, 1920			species	preserved specimen	AP	2019	Ivan Kos	KROK119-20	OL874941
BMKR00896	KROK14	Scolopendromorpha	Cryptops parisi Brölemann, 1920			species	preserved specimen	AP	2019	Ivan Kos	KROK120-20	OL874940
BMKR00897	KROK16	Scolopendromorpha	Cryptops parisi Brölemann, 1920			species	preserved specimen	AP	2019	Ivan Kos	KROK050-19	MT994086
BMKR00898	KROK16	Scolopendromorpha	Cryptops parisi Brölemann, 1920			species	preserved specimen	AP	2019	Ivan Kos	KROK121-20	OL874939
BMKR00899	KROK31	Geophilomorpha	Schendyla armata Brölemann, 1901		juvenile	species	preserved specimen	MP	2019	Ivan Kos
BMKR00900	KROK31	Geophilomorpha	Schendyla armata Brölemann, 1901	F	adult	species	preserved specimen	AP	2019	Ivan Kos
BMKR00901	KROK17	Scolopendromorpha	Cryptops parisi Brölemann, 1920			species	preserved specimen	AP	2019	Ivan Kos	KROK122-20	OL874942
BMKR00902	KROK31	Geophilomorpha	Schendyla tyrolensis Meinert, 1870	M	adult	species	preserved specimen	AP	2019	Ivan Kos
BMKR00903	KROK31	Geophilomorpha	Stenotaenia sorrentina Attems, 1903		juvenile	species	preserved specimen	MP	2019	Ivan Kos
BMKR00904	KROK31	Geophilomorpha	Strigamia acuminata (Leach, 1814)	F	adult	species	preserved specimen	AP	2019	Ivan Kos
BMKR00905	KROK31	Geophilomorpha	Strigamia acuminata (Leach, 1814)	F	adult	species	preserved specimen	AP	2019	Ivan Kos
BMKR00906	KROK31	Geophilomorpha	Strigamia acuminata (Leach, 1814)	F	adult	species	preserved specimen	AP	2019	Ivan Kos
BMKR00907	KROK31	Geophilomorpha	Strigamia acuminata (Leach, 1814)	F	adult	species	preserved specimen	AP	2019	Ivan Kos
BMKR00908	KROK31	Geophilomorpha	Strigamia transsilvanica Verhoeff, 1928			species	preserved specimen	AP	2019	Ivan Kos
BMKR00909	KROK18	Scolopendromorpha	Cryptops parisi Brölemann, 1920			species	preserved specimen	AP	2019	Ivan Kos	KROK123-20	OL874943
BMKR00910	KROK31	Geophilomorpha	Strigamia transsilvanica Verhoeff, 1928		juvenile	species	preserved specimen	AP	2019	Ivan Kos
BMKR00911	KROK31	Lithobiomorpha	Lithobius carinthiacus Koren, 1992	M	adult	species	preserved specimen	AP	2019	Ivan Kos
BMKR00912	KROK06	Scolopendromorpha	Cryptops parisi Brölemann, 1920			species	preserved specimen	AP	2019	Ivan Kos	KROK124-20	OL874944
BMKR00913	KROK19	Scolopendromorpha	Cryptops parisi Brölemann, 1920			species	preserved specimen	AP	2019	Ivan Kos
BMKR00914	KROK31	Lithobiomorpha	Lithobius latro Meinert, 1872	M	adult	species	preserved specimen	MP	2019	Ivan Kos
BMKR00915	KROK31	Lithobiomorpha	Lithobius latro Meinert, 1872	M	adult	species	preserved specimen	AP	2019	Ivan Kos
BMKR00916	KROK31	Lithobiomorpha	Lithobius latro Meinert, 1872	M	adult	species	preserved specimen	AP	2019	Ivan Kos
BMKR00917	KROK31	Lithobiomorpha	Lithobius latro Meinert, 1872	F	adult	species	preserved specimen	AP	2019	Ivan Kos
BMKR00918	KROK30	Scolopendromorpha	Cryptops hortensis Donovan, 1810			species	preserved specimen	AP	2019	Ivan Kos	KROK125-20	OL874934
BMKR00919	KROK31	Lithobiomorpha	Lithobius pygmaeus Latzel, 1880	M	adult	species	preserved specimen	MP	2019	Ivan Kos
BMKR00920	KROK31	Lithobiomorpha	Lithobius pygmaeus Latzel, 1880	F	adult	species	preserved specimen	AP	2019	Ivan Kos
BMKR00921	KROK31	Lithobiomorpha	Lithobius pygmaeus Latzel, 1880	M	adult	species	preserved specimen	AP	2019	Ivan Kos
BMKR00922	KROK31	Lithobiomorpha	Lithobius pygmaeus Latzel, 1880	M	adult	species	preserved specimen	AP	2019	Ivan Kos
BMKR00923	KROK31	Lithobiomorpha	Lithobius pygmaeus Latzel, 1880	F	adult	species	preserved specimen	AP	2019	Ivan Kos
BMKR00924	KROK31	Lithobiomorpha	Lithobius pygmaeus Latzel, 1880	M	adult	species	preserved specimen	AP	2019	Ivan Kos
BMKR00925	KROK31	Scolopendromorpha	Cryptops hortensis Donovan, 1810			species	preserved specimen	MP	2019	Ivan Kos
BMKR00926	KROK31	Scolopendromorpha	Cryptops hortensis Donovan, 1810			species	preserved specimen	MP	2019	Ivan Kos
BMKR00927	KROK31	Scolopendromorpha	Cryptops hortensis Donovan, 1810			species	preserved specimen	MP	2019	Ivan Kos
BMKR00928	KROK30	Scolopendromorpha	Cryptops hortensis Donovan, 1810			species	preserved specimen	AP	2019	Ivan Kos	KROK126-20	OL874933
BMKR00929	KROK31	Scolopendromorpha	Cryptops parisi Brölemann, 1920			species	preserved specimen	AP	2019	Ivan Kos
BMKR00930	KROK31	Scolopendromorpha	Cryptops rucneri Matic, 1967			species	preserved specimen	MP	2019	Ivan Kos
BMKR00931	KROK32	Geophilomorpha	Geophilus alpinus Meinert, 1870	M	adult	species	preserved specimen	MP	2019	Ivan Kos
BMKR00932	KROK32	Geophilomorpha	Schendyla armata Brölemann, 1901	M	adult	species	preserved specimen	MP	2019	Ivan Kos
BMKR00933	KROK32	Geophilomorpha	Schendyla tyrolensis Meinert, 1870		juvenile	species	preserved specimen	MP	2019	Ivan Kos
BMKR00934	KROK32	Geophilomorpha	Schendyla tyrolensis Meinert, 1870		juvenile	species	preserved specimen	MP	2019	Ivan Kos
BMKR00935	KROK32	Lithobiomorpha	Lithobius pygmaeus Latzel, 1880	F	adult	species	preserved specimen	MP	2019	Ivan Kos
BMKR00936	KROK32	Lithobiomorpha	Lithobius pygmaeus Latzel, 1880	F	adult	species	preserved specimen	MP	2019	Ivan Kos
BMKR00937	KROK32	Lithobiomorpha	Lithobius pygmaeus Latzel, 1880	M	adult	species	preserved specimen	MP	2019	Ivan Kos
BMKR00938	KROK32	Lithobiomorpha	Lithobius pygmaeus Latzel, 1880	M	adult	species	preserved specimen	MP	2019	Ivan Kos
BMKR00939	KROK32	Scolopendromorpha	Cryptops hortensis Donovan, 1810			species	preserved specimen	MP	2019	Ivan Kos
BMKR00940	KROK32	Scolopendromorpha	Cryptops hortensis Donovan, 1810			species	preserved specimen	MP	2019	Ivan Kos
BMKR00941	KROK32	Araneae	Centromerus silvicola (Kulczynski, 1887)	F	adult	species	preserved specimen	AP	2019	Žan Kuralt
BMKR00942	KROK32	Araneae	Comaroma simoni Bertkau, 1889	F	adult	species	preserved specimen	AP	2019	Žan Kuralt
BMKR00943	KROK32	Araneae	Comaroma simoni Bertkau, 1889	F	adult	species	preserved specimen	AP	2019	Žan Kuralt
BMKR00944	KROK32	Araneae	Comaroma simoni Bertkau, 1889	F	adult	species	preserved specimen	AP	2019	Žan Kuralt
BMKR00945	KROK32	Araneae	Comaroma simoni Bertkau, 1889	F	adult	species	preserved specimen	AP	2019	Žan Kuralt
BMKR00946	KROK32	Araneae	Comaroma simoni Bertkau, 1889	F	adult	species	preserved specimen	AP	2019	Žan Kuralt
BMKR00947	KROK01	Araneae	Coelotes atropos (Walckenaer, 1830)	M	adult	species	preserved specimen	AP	2019	Žan Kuralt	KROK052-19	MT994082
BMKR00948	KROK01	Araneae	Coelotes atropos (Walckenaer, 1830)	F	adult	species	preserved specimen	AP	2019	Žan Kuralt
BMKR00949	KROK38	Coleoptera	Cychrus attenuatus (Fabricius, 1792)			species	preserved specimen	AP	2019	Urška Ratajc
BMKR00950	KROK38	Coleoptera	Molops elatus (Fabricius, 1801)	F	adult	species	preserved specimen	AP	2019	Urška Ratajc
BMKR00951	KROK38	Coleoptera	Molops piceus (Panzer, 1793)	M	adult	species	preserved specimen	AP	2019	Urška Ratajc
BMKR00952	KROK03	Araneae	Coelotes atropos (Walckenaer, 1830)	M	adult	species	preserved specimen	AP	2019	Žan Kuralt
BMKR00953	KROK32	Geophilomorpha	Geophilus electricus (Linné, 1758)	F	adult	species	preserved specimen	MP	2019	Ivan Kos
BMKR00954	KROK05	Araneae	Coelotes atropos (Walckenaer, 1830)	M	adult	species	preserved specimen	AP	2019	Žan Kuralt
BMKR00955	KROK42	Araneae	Coelotes atropos (Walckenaer, 1830)	F	adult	species	preserved specimen	AP	2019	Žan Kuralt	KROK127-20	OL874931
BMKR00956	KROK42	Araneae	Coelotes atropos (Walckenaer, 1830)	F	adult	species	preserved specimen	AP	2019	Žan Kuralt
BMKR00957	KROK32	Geophilomorpha	Strigamia acuminata (Leach, 1814)	F	adult	species	preserved specimen	AP	2019	Ivan Kos
BMKR00958	KROK32	Geophilomorpha	Strigamia acuminata (Leach, 1814)	F	adult	species	preserved specimen	AP	2019	Ivan Kos
BMKR00959	KROK32	Geophilomorpha	Strigamia acuminata (Leach, 1814)	F	adult	species	preserved specimen	AP	2019	Ivan Kos
BMKR00960	KROK32	Geophilomorpha	Strigamia acuminata (Leach, 1814)	F	adult	species	preserved specimen	AP	2019	Ivan Kos
BMKR00961	KROK32	Geophilomorpha	Strigamia acuminata (Leach, 1814)	M	adult	species	preserved specimen	AP	2019	Ivan Kos
BMKR00962	KROK32	Geophilomorpha	Strigamia acuminata (Leach, 1814)	F	adult	species	preserved specimen	AP	2019	Ivan Kos
BMKR00963	KROK32	Geophilomorpha	Strigamia acuminata (Leach, 1814)	F	adult	species	preserved specimen	AP	2019	Ivan Kos
BMKR00964	KROK32	Geophilomorpha	Strigamia acuminata (Leach, 1814)	F	adult	species	preserved specimen	AP	2019	Ivan Kos
BMKR00965	KROK32	Geophilomorpha	Strigamia acuminata (Leach, 1814)	F	adult	species	preserved specimen	AP	2019	Ivan Kos
BMKR00966	KROK32	Geophilomorpha	Strigamia acuminata (Leach, 1814)	F	adult	species	preserved specimen	AP	2019	Ivan Kos
BMKR00967	KROK32	Geophilomorpha	Strigamia acuminata (Leach, 1814)	F	adult	species	preserved specimen	AP	2019	Ivan Kos
BMKR00968	KROK32	Geophilomorpha	Strigamia acuminata (Leach, 1814)	F	adult	species	preserved specimen	AP	2019	Ivan Kos
BMKR00969	KROK32	Geophilomorpha	Strigamia acuminata (Leach, 1814)	F	adult	species	preserved specimen	AP	2019	Ivan Kos
BMKR00970	KROK32	Geophilomorpha	Strigamia acuminata (Leach, 1814)	M	adult	species	preserved specimen	AP	2019	Ivan Kos
BMKR00971	KROK32	Geophilomorpha	Strigamia acuminata (Leach, 1814)	F	adult	species	preserved specimen	AP	2019	Ivan Kos
BMKR00972	KROK32	Geophilomorpha	Strigamia acuminata (Leach, 1814)	M	adult	species	preserved specimen	AP	2019	Ivan Kos
BMKR00973	KROK32	Geophilomorpha	Strigamia acuminata (Leach, 1814)	M	adult	species	preserved specimen	AP	2019	Ivan Kos
BMKR00974	KROK32	Geophilomorpha	Strigamia acuminata (Leach, 1814)	F	adult	species	preserved specimen	AP	2019	Ivan Kos
BMKR00975	KROK32	Geophilomorpha	Strigamia acuminata (Leach, 1814)	M	adult	species	preserved specimen	AP	2019	Ivan Kos
BMKR00976	KROK32	Geophilomorpha	Strigamia transsilvanica Verhoeff, 1928	F	adult	species	preserved specimen	AP	2019	Ivan Kos
BMKR00977	KROK32	Geophilomorpha	Strigamia transsilvanica Verhoeff, 1928	M	adult	species	preserved specimen	AP	2019	Ivan Kos
BMKR00978	KROK32	Geophilomorpha	Strigamia transsilvanica Verhoeff, 1928		juvenile	species	preserved specimen	AP	2019	Ivan Kos
BMKR00979	KROK03	Araneae	Histopona luxurians (Kulczynski, 1897)	M	adult	species	preserved specimen	AP	2019	Žan Kuralt	KROK053-19	MT994106
BMKR00980	KROK32	Lithobiomorpha	Lithobius dentatus C.L.Koch, 1844	F	adult	species	preserved specimen	AP	2019	Ivan Kos
BMKR00981	KROK19	Araneae	Histopona luxurians (Kulczynski, 1897)	F	adult	species	preserved specimen	AP	2019	Žan Kuralt
BMKR00982	KROK41	Araneae	Histopona luxurians (Kulczynski, 1897)	M	adult	species	preserved specimen	AP	2019	Žan Kuralt	KROK128-20	OL874953
BMKR00983	KROK32	Lithobiomorpha	Lithobius pygmaeus Latzel, 1880	M	adult	species	preserved specimen	AP	2019	Ivan Kos
BMKR00984	KROK32	Lithobiomorpha	Lithobius pygmaeus Latzel, 1880	F	adult	species	preserved specimen	AP	2019	Ivan Kos
BMKR00985	KROK32	Lithobiomorpha	Lithobius pygmaeus Latzel, 1880	F	adult	species	preserved specimen	AP	2019	Ivan Kos
BMKR00986	KROK32	Lithobiomorpha	Lithobius pygmaeus Latzel, 1880	F	adult	species	preserved specimen	AP	2019	Ivan Kos
BMKR00987	KROK32	Lithobiomorpha	Lithobius pygmaeus Latzel, 1880	F	adult	species	preserved specimen	AP	2019	Ivan Kos
BMKR00988	KROK32	Lithobiomorpha	Lithobius pygmaeus Latzel, 1880	F	adult	species	preserved specimen	AP	2019	Ivan Kos
BMKR00989	KROK32	Lithobiomorpha	Lithobius pygmaeus Latzel, 1880	M	adult	species	preserved specimen	AP	2019	Ivan Kos
BMKR00990	KROK32	Lithobiomorpha	Lithobius pygmaeus Latzel, 1880	M	adult	species	preserved specimen	AP	2019	Ivan Kos
BMKR00991	KROK32	Lithobiomorpha	Lithobius pygmaeus Latzel, 1880	F	adult	species	preserved specimen	AP	2019	Ivan Kos
BMKR00992	KROK32	Lithobiomorpha	Lithobius pygmaeus Latzel, 1880	M	adult	species	preserved specimen	AP	2019	Ivan Kos
BMKR00993	KROK32	Lithobiomorpha	Lithobius pygmaeus Latzel, 1880	M	adult	species	preserved specimen	AP	2019	Ivan Kos
BMKR00994	KROK32	Lithobiomorpha	Lithobius pygmaeus Latzel, 1880	M	adult	species	preserved specimen	AP	2019	Ivan Kos
BMKR00995	KROK32	Lithobiomorpha	Lithobius pygmaeus Latzel, 1880	M	adult	species	preserved specimen	AP	2019	Ivan Kos
BMKR00996	KROK32	Lithobiomorpha	Lithobius pygmaeus Latzel, 1880	M	adult	species	preserved specimen	AP	2019	Ivan Kos
BMKR00997	KROK32	Lithobiomorpha	Lithobius pygmaeus Latzel, 1880	M	adult	species	preserved specimen	AP	2019	Ivan Kos
BMKR00998	KROK32	Lithobiomorpha	Lithobius pygmaeus Latzel, 1880	M	adult	species	preserved specimen	AP	2019	Ivan Kos
BMKR00999	KROK32	Lithobiomorpha	Lithobius pygmaeus Latzel, 1880	F	adult	species	preserved specimen	AP	2019	Ivan Kos
BMKR01000	KROK32	Lithobiomorpha	Lithobius pygmaeus Latzel, 1880	F	adult	species	preserved specimen	AP	2019	Ivan Kos
BMKR01001	KROK32	Lithobiomorpha	Lithobius pygmaeus Latzel, 1880	F	adult	species	preserved specimen	AP	2019	Ivan Kos
BMKR01002	KROK32	Lithobiomorpha	Lithobius pygmaeus Latzel, 1880	M	adult	species	preserved specimen	AP	2019	Ivan Kos
BMKR01003	KROK32	Lithobiomorpha	Lithobius pygmaeus Latzel, 1880	F	adult	species	preserved specimen	AP	2019	Ivan Kos
BMKR01004	KROK32	Lithobiomorpha	Lithobius pygmaeus Latzel, 1880	F	adult	species	preserved specimen	AP	2019	Ivan Kos
BMKR01005	KROK32	Scolopendromorpha	Cryptops hortensis Donovan, 1810			species	preserved specimen	MP	2019	Ivan Kos
BMKR01006	KROK32	Scolopendromorpha	Cryptops parisi Brölemann, 1920			species	preserved specimen	MP	2019	Ivan Kos
BMKR01007	KROK32	Scolopendromorpha	Cryptops parisi Brölemann, 1920			species	preserved specimen	AP	2019	Ivan Kos
BMKR01008	KROK33	Geophilomorpha	Clinopodes carinthiacus (Latzel,1880)	M	adult	species	preserved specimen	MP	2019	Ivan Kos
BMKR01009	KROK33	Geophilomorpha	Geophilus electricus (Linné, 1758)	M	adult	species	preserved specimen	MP	2019	Ivan Kos
BMKR01010	KROK33	Lithobiomorpha	Lithobius carinthiacus Koren, 1992	M	adult	species	preserved specimen	MP	2019	Ivan Kos
BMKR01011	KROK33	Lithobiomorpha	Lithobius pygmaeus Latzel, 1880	M	adult	species	preserved specimen	MP	2019	Ivan Kos
BMKR01012	KROK33	Lithobiomorpha	Lithobius pygmaeus Latzel, 1880	F	adult	species	preserved specimen	MP	2019	Ivan Kos
BMKR01013	KROK33	Lithobiomorpha	Lithobius pygmaeus Latzel, 1880	M	adult	species	preserved specimen	MP	2019	Ivan Kos
BMKR01014	KROK33	Scolopendromorpha	Cryptops hortensis Donovan, 1810			species	preserved specimen	MP	2019	Ivan Kos
BMKR01015	KROK33	Scolopendromorpha	Cryptops hortensis Donovan, 1810			species	preserved specimen	MP	2019	Ivan Kos
BMKR01016	KROK33	Araneae	Comaroma simoni Bertkau, 1889	F	adult	species	preserved specimen	AP	2019	Žan Kuralt
BMKR01017	KROK33	Araneae	Comaroma simoni Bertkau, 1889	F	adult	species	preserved specimen	AP	2019	Žan Kuralt
BMKR01018	KROK45	Araneae	Histopona luxurians (Kulczynski, 1897)	F	adult	species	preserved specimen	AP	2019	Žan Kuralt	KROK129-20	OL874952
BMKR01019	KROK33	Araneae	Comaroma simoni Bertkau, 1889	F	adult	species	preserved specimen	AP	2019	Žan Kuralt
BMKR01020	KROK33	Lithobiomorpha	Lithobius anici sp.n.	M	adult	species	preserved specimen	AP	2019	Ivan Kos
BMKR01021	KROK38	Coleoptera	Pterostichus burmeisteri Heer, 1837	M	adult	species	preserved specimen	AP	2019	Urška Ratajc
BMKR01022	KROK38	Coleoptera	Pterostichus burmeisteri Heer, 1837	M	adult	species	preserved specimen	AP	2019	Urška Ratajc
BMKR01023	KROK38	Coleoptera	Pterostichus burmeisteri Heer, 1837	M	adult	species	preserved specimen	AP	2019	Urška Ratajc
BMKR01024	KROK38	Coleoptera	Pterostichus burmeisteri Heer, 1837	M	adult	species	preserved specimen	AP	2019	Urška Ratajc
BMKR01025	KROK39	Coleoptera	Pterostichus oblongopunctatus Fabricius, 1787	F	adult	species	preserved specimen	AP	2019	Urška Ratajc	KROK016-19	MT994135
BMKR01026	KROK39	Coleoptera	Abax ovalis (Duftschmid, 1812)	M	adult	species	preserved specimen	AP	2019	Urška Ratajc
BMKR01027	KROK39	Coleoptera	Abax ovalis (Duftschmid, 1812)	F	adult	species	preserved specimen	AP	2019	Urška Ratajc
BMKR01028	KROK39	Coleoptera	Molops piceus (Panzer, 1793)	M	adult	species	preserved specimen	AP	2019	Urška Ratajc
BMKR01029	KROK47	Araneae	Histopona luxurians (Kulczynski, 1897)	F	adult	species	preserved specimen	AP	2019	Žan Kuralt
BMKR01030	KROK53	Araneae	Histopona luxurians (Kulczynski, 1897)	F	adult	species	preserved specimen	AP	2019	Žan Kuralt
BMKR01031	KROK33	Geophilomorpha	Geophilus flavus (De Geer, 1778)	F	adult	species	preserved specimen	MP	2019	Ivan Kos
BMKR01032	KROK33	Geophilomorpha	Schendyla armata Brölemann, 1901	F	adult	species	preserved specimen	AP	2019	Ivan Kos
BMKR01033	KROK33	Geophilomorpha	Schendyla armata Brölemann, 1901	M	adult	species	preserved specimen	MP	2019	Ivan Kos
BMKR01034	KROK33	Geophilomorpha	Schendyla carniolensis Verhoeff, 1902	F	adult	species	preserved specimen	AP	2019	Ivan Kos
BMKR01035	KROK33	Geophilomorpha	Schendyla carniolensis Verhoeff, 1902	M	adult	species	preserved specimen	MP	2019	Ivan Kos
BMKR01036	KROK33	Geophilomorpha	Schendyla carniolensis Verhoeff, 1902	F	adult	species	preserved specimen	AP	2019	Ivan Kos
BMKR01037	KROK33	Geophilomorpha	Schendyla tyrolensis Meinert, 1870	F	adult	species	preserved specimen	AP	2019	Ivan Kos
BMKR01038	KROK33	Geophilomorpha	Schendyla tyrolensis Meinert, 1870		juvenile	species	preserved specimen	MP	2019	Ivan Kos
BMKR01039	KROK33	Geophilomorpha	Strigamia acuminata (Leach, 1814)	M	adult	species	preserved specimen	AP	2019	Ivan Kos
BMKR01040	KROK33	Geophilomorpha	Strigamia acuminata (Leach, 1814)	F	adult	species	preserved specimen	AP	2019	Ivan Kos
BMKR01041	KROK33	Geophilomorpha	Strigamia acuminata (Leach, 1814)	M	adult	species	preserved specimen	MP	2019	Ivan Kos
BMKR01042	KROK33	Geophilomorpha	Strigamia acuminata (Leach, 1814)	F	adult	species	preserved specimen	MP	2019	Ivan Kos
BMKR01043	KROK33	Geophilomorpha	Strigamia acuminata (Leach, 1814)	M	adult	species	preserved specimen	AP	2019	Ivan Kos
BMKR01044	KROK33	Geophilomorpha	Strigamia acuminata (Leach, 1814)	M	adult	species	preserved specimen	AP	2019	Ivan Kos
BMKR01045	KROK33	Geophilomorpha	Strigamia acuminata (Leach, 1814)	M	adult	species	preserved specimen	AP	2019	Ivan Kos
BMKR01046	KROK33	Geophilomorpha	Strigamia acuminata (Leach, 1814)	F	adult	species	preserved specimen	AP	2019	Ivan Kos
BMKR01047	KROK33	Geophilomorpha	Strigamia acuminata (Leach, 1814)	F	adult	species	preserved specimen	AP	2019	Ivan Kos
BMKR01048	KROK33	Geophilomorpha	Strigamia acuminata (Leach, 1814)	M	adult	species	preserved specimen	AP	2019	Ivan Kos
BMKR01049	KROK33	Geophilomorpha	Strigamia acuminata (Leach, 1814)	M	adult	species	preserved specimen	AP	2019	Ivan Kos
BMKR01050	KROK33	Geophilomorpha	Strigamia acuminata (Leach, 1814)		juvenile	species	preserved specimen	AP	2019	Ivan Kos
BMKR01051	KROK33	Geophilomorpha	Strigamia transsilvanica Verhoeff, 1928	M	adult	species	preserved specimen	AP	2019	Ivan Kos
BMKR01052	KROK33	Lithobiomorpha	Lithobius carinthiacus Koren, 1992	M	adult	species	preserved specimen	AP	2019	Ivan Kos
BMKR01053	KROK45	Araneae	Histopona torpida (C.L.Koch, 1837)	M	adult	species	preserved specimen	AP	2019	Žan Kuralt	KROK054-19	MT994107
BMKR01054	KROK33	Lithobiomorpha	Lithobius carinthiacus Koren, 1992	M	adult	species	preserved specimen	AP	2019	Ivan Kos
BMKR01055	KROK47	Araneae	Histopona torpida (C.L.Koch, 1837)	M	adult	species	preserved specimen	AP	2019	Žan Kuralt
BMKR01056	KROK33	Lithobiomorpha	Lithobius pygmaeus Latzel, 1880	F	adult	species	preserved specimen	AP	2019	Ivan Kos
BMKR01057	KROK33	Lithobiomorpha	Lithobius pygmaeus Latzel, 1880	F	adult	species	preserved specimen	AP	2019	Ivan Kos
BMKR01058	KROK33	Lithobiomorpha	Lithobius pygmaeus Latzel, 1880	M	adult	species	preserved specimen	AP	2019	Ivan Kos
BMKR01059	KROK33	Lithobiomorpha	Lithobius pygmaeus Latzel, 1880	F	adult	species	preserved specimen	AP	2019	Ivan Kos
BMKR01060	KROK33	Lithobiomorpha	Lithobius pygmaeus Latzel, 1880	M	adult	species	preserved specimen	AP	2019	Ivan Kos
BMKR01061	KROK33	Lithobiomorpha	Lithobius pygmaeus Latzel, 1880	M	adult	species	preserved specimen	AP	2019	Ivan Kos
BMKR01062	KROK56	Araneae	Histopona torpida (C.L.Koch, 1837)	M	adult	species	preserved specimen	AP	2019	Žan Kuralt
BMKR01063	KROK33	Scolopendromorpha	Cryptops hortensis Donovan, 1810			species	preserved specimen	MP	2019	Ivan Kos
BMKR01064	KROK33	Scolopendromorpha	Cryptops hortensis Donovan, 1810			species	preserved specimen	MP	2019	Ivan Kos
BMKR01065	KROK33	Scolopendromorpha	Cryptops hortensis Donovan, 1810			species	preserved specimen	MP	2019	Ivan Kos
BMKR01066	KROK33	Scolopendromorpha	Cryptops hortensis Donovan, 1810			species	preserved specimen	MP	2019	Ivan Kos
BMKR01067	KROK33	Scolopendromorpha	Cryptops hortensis Donovan, 1810			species	preserved specimen	MP	2019	Ivan Kos
BMKR01068	KROK33	Scolopendromorpha	Cryptops hortensis Donovan, 1810			species	preserved specimen	MP	2019	Ivan Kos
BMKR01069	KROK33	Scolopendromorpha	Cryptops hortensis Donovan, 1810			species	preserved specimen	MP	2019	Ivan Kos
BMKR01070	KROK33	Scolopendromorpha	Cryptops hortensis Donovan, 1810			species	preserved specimen	AP	2019	Ivan Kos
BMKR01071	KROK33	Scolopendromorpha	Cryptops hortensis Donovan, 1810			species	preserved specimen	MP	2019	Ivan Kos
BMKR01072	KROK33	Scolopendromorpha	Cryptops hortensis Donovan, 1810			species	preserved specimen	MP	2019	Ivan Kos
BMKR01073	KROK33	Scolopendromorpha	Cryptops hortensis Donovan, 1810			species	preserved specimen	MP	2019	Ivan Kos
BMKR01074	KROK33	Scolopendromorpha	Cryptops parisi Brölemann, 1920			species	preserved specimen	AP	2019	Ivan Kos
BMKR01075	KROK33	Scolopendromorpha	Cryptops parisi Brölemann, 1920			species	preserved specimen	AP	2019	Ivan Kos
BMKR01076	KROK33	Scolopendromorpha	Cryptops parisi Brölemann, 1920			species	preserved specimen	AP	2019	Ivan Kos
BMKR01077	KROK33	Scolopendromorpha	Cryptops parisi Brölemann, 1920			species	preserved specimen	AP	2019	Ivan Kos
BMKR01078	KROK33	Araneae	Comaroma simoni Bertkau, 1889	F	adult	species	preserved specimen	AP	2019	Žan Kuralt
BMKR01079	KROK34	Araneae	Centrophantes roeweri (Wiehle, 1961)	F	adult	species	preserved specimen	AP	2019	Žan Kuralt
BMKR01080	KROK58	Araneae	Histopona torpida (C.L.Koch, 1837)	M	adult	species	preserved specimen	AP	2019	Žan Kuralt	KROK130-20	OL874954
BMKR01081	KROK34	Araneae	Inermocoelotes inermis (L. Koch, 1855)	M	adult	species	preserved specimen	AP	2019	Žan Kuralt
BMKR01082	KROK34	Araneae	Microneta viaria (Blackwall, 1841)	F	adult	species	preserved specimen	AP	2019	Žan Kuralt
BMKR01083	KROK01	Araneae	Inermocoelotes anoplus (Kulczynski, 1897)	M	adult	species	preserved specimen	AP	2019	Žan Kuralt
BMKR01084	KROK02	Araneae	Inermocoelotes anoplus (Kulczynski, 1897)	M	adult	species	preserved specimen	AP	2019	Žan Kuralt
BMKR01085	KROK36	Lithobiomorpha	Lithobius pygmaeus Latzel, 1880	F	adult	species	preserved specimen	AP	2019	Ivan Kos
BMKR01086	KROK37	Araneae	Amaurobius obustus L. Koch, 1868	M	adult	species	preserved specimen	AP	2019	Žan Kuralt
BMKR01087	KROK37	Araneae	Amaurobius obustus L. Koch, 1868	M	adult	species	preserved specimen	AP	2019	Žan Kuralt
BMKR01088	KROK37	Araneae	Amaurobius obustus L. Koch, 1868	M	adult	species	preserved specimen	AP	2019	Žan Kuralt
BMKR01089	KROK37	Araneae	Harpactea lepida (C. L. Koch, 1838)	M	adult	species	preserved specimen	AP	2019	Žan Kuralt
BMKR01090	KROK37	Araneae	Harpactea lepida (C. L. Koch, 1838)	M	adult	species	preserved specimen	AP	2019	Žan Kuralt
BMKR01091	KROK37	Araneae	Harpactea lepida (C. L. Koch, 1838)	M	adult	species	preserved specimen	AP	2019	Žan Kuralt
BMKR01092	KROK37	Araneae	Harpactea lepida (C. L. Koch, 1838)	M	adult	species	preserved specimen	AP	2019	Žan Kuralt
BMKR01093	KROK37	Araneae	Harpactea lepida (C. L. Koch, 1838)	M	adult	species	preserved specimen	AP	2019	Žan Kuralt
BMKR01094	KROK37	Araneae	Harpactea lepida (C. L. Koch, 1838)	M	adult	species	preserved specimen	AP	2019	Žan Kuralt
BMKR01095	KROK37	Araneae	Harpactea lepida (C. L. Koch, 1838)	M	adult	species	preserved specimen	AP	2019	Žan Kuralt
BMKR01096	KROK37	Araneae	Harpactea lepida (C. L. Koch, 1838)	F	adult	species	preserved specimen	AP	2019	Žan Kuralt
BMKR01097	KROK37	Araneae	Harpactea lepida (C. L. Koch, 1838)	F	adult	species	preserved specimen	AP	2019	Žan Kuralt
BMKR01098	KROK37	Araneae	Harpactea lepida (C. L. Koch, 1838)	F	adult	species	preserved specimen	AP	2019	Žan Kuralt
BMKR01099	KROK37	Araneae	Harpactea lepida (C. L. Koch, 1838)			species	preserved specimen	AP	2019	Žan Kuralt
BMKR01100	KROK37	Araneae	Inermocoelotes inermis (L. Koch, 1855)	M	adult	species	preserved specimen	AP	2019	Žan Kuralt
BMKR01101	KROK37	Araneae	Inermocoelotes inermis (L. Koch, 1855)	M	adult	species	preserved specimen	AP	2019	Žan Kuralt
BMKR01102	KROK37	Araneae	Inermocoelotes inermis (L. Koch, 1855)	M	adult	species	preserved specimen	AP	2019	Žan Kuralt
BMKR01103	KROK37	Araneae	Inermocoelotes inermis (L. Koch, 1855)	M	adult	species	preserved specimen	AP	2019	Žan Kuralt
BMKR01104	KROK37	Araneae	Inermocoelotes inermis (L. Koch, 1855)	M	adult	species	preserved specimen	AP	2019	Žan Kuralt
BMKR01105	KROK37	Araneae	Inermocoelotes inermis (L. Koch, 1855)	M	adult	species	preserved specimen	AP	2019	Žan Kuralt
BMKR01106	KROK37	Araneae	Inermocoelotes inermis (L. Koch, 1855)	M	adult	species	preserved specimen	AP	2019	Žan Kuralt
BMKR01107	KROK37	Araneae	Inermocoelotes inermis (L. Koch, 1855)	M	adult	species	preserved specimen	AP	2019	Žan Kuralt
BMKR01108	KROK37	Araneae	Inermocoelotes inermis (L. Koch, 1855)	M	adult	species	preserved specimen	AP	2019	Žan Kuralt
BMKR01109	KROK37	Araneae	Inermocoelotes inermis (L. Koch, 1855)	M	adult	species	preserved specimen	AP	2019	Žan Kuralt
BMKR01110	KROK37	Araneae	Inermocoelotes inermis (L. Koch, 1855)	M	adult	species	preserved specimen	AP	2019	Žan Kuralt
BMKR01111	KROK37	Araneae	Inermocoelotes inermis (L. Koch, 1855)	M	adult	species	preserved specimen	AP	2019	Žan Kuralt
BMKR01112	KROK37	Araneae	Inermocoelotes inermis (L. Koch, 1855)	M	adult	species	preserved specimen	AP	2019	Žan Kuralt
BMKR01113	KROK37	Araneae	Inermocoelotes inermis (L. Koch, 1855)	M	adult	species	preserved specimen	AP	2019	Žan Kuralt
BMKR01114	KROK37	Araneae	Inermocoelotes inermis (L. Koch, 1855)	M	adult	species	preserved specimen	AP	2019	Žan Kuralt
BMKR01115	KROK37	Araneae	Inermocoelotes inermis (L. Koch, 1855)	M	adult	species	preserved specimen	AP	2019	Žan Kuralt
BMKR01116	KROK37	Araneae	Inermocoelotes inermis (L. Koch, 1855)	F	adult	species	preserved specimen	AP	2019	Žan Kuralt
BMKR01117	KROK37	Araneae	Inermocoelotes inermis (L. Koch, 1855)	M	adult	species	preserved specimen	AP	2019	Žan Kuralt
BMKR01118	KROK37	Araneae	Inermocoelotes inermis (L. Koch, 1855)	M	adult	species	preserved specimen	AP	2019	Žan Kuralt
BMKR01119	KROK37	Araneae	Inermocoelotes inermis (L. Koch, 1855)	M	adult	species	preserved specimen	AP	2019	Žan Kuralt
BMKR01120	KROK37	Araneae	Inermocoelotes inermis (L. Koch, 1855)	M	adult	species	preserved specimen	AP	2019	Žan Kuralt
BMKR01121	KROK37	Araneae	Inermocoelotes inermis (L. Koch, 1855)	M	adult	species	preserved specimen	AP	2019	Žan Kuralt
BMKR01122	KROK37	Araneae	Microneta viaria (Blackwall, 1841)	M	adult	species	preserved specimen	AP	2019	Žan Kuralt
BMKR01123	KROK37	Araneae	Microneta viaria (Blackwall, 1841)	M	adult	species	preserved specimen	AP	2019	Žan Kuralt
BMKR01124	KROK37	Araneae	Microneta viaria (Blackwall, 1841)	M	adult	species	preserved specimen	AP	2019	Žan Kuralt
BMKR01125	KROK37	Araneae	Microneta viaria (Blackwall, 1841)	M	adult	species	preserved specimen	AP	2019	Žan Kuralt
BMKR01126	KROK37	Araneae	Microneta viaria (Blackwall, 1841)	M	adult	species	preserved specimen	AP	2019	Žan Kuralt
BMKR01127	KROK37	Araneae	Microneta viaria (Blackwall, 1841)	M	adult	species	preserved specimen	AP	2019	Žan Kuralt
BMKR01128	KROK37	Araneae	Microneta viaria (Blackwall, 1841)	M	adult	species	preserved specimen	AP	2019	Žan Kuralt
BMKR01129	KROK37	Araneae	Tenuiphantes tenebricola (Wider, 1834)	F	adult	species	preserved specimen	AP	2019	Žan Kuralt
BMKR01130	KROK37	Araneae	Centrophantes roeweri (Wiehle, 1961)	F	adult	species	preserved specimen	AP	2019	Žan Kuralt
BMKR01131	KROK37	Araneae	Centrophantes roeweri (Wiehle, 1961)	F	adult	species	preserved specimen	AP	2019	Žan Kuralt
BMKR01132	KROK37	Geophilomorpha	Strigamia acuminata (Leach, 1814)	M	adult	species	preserved specimen	AP	2019	Ivan Kos
BMKR01133	KROK37	Lithobiomorpha	Lithobius latro Meinert, 1872	F	adult	species	preserved specimen	AP	2019	Ivan Kos
BMKR01134	KROK04	Araneae	Inermocoelotes anoplus (Kulczynski, 1897)	M	adult	species	preserved specimen	AP	2019	Žan Kuralt	KROK131-20	OL874955
BMKR01135	KROK29	Araneae	Inermocoelotes anoplus (Kulczynski, 1897)	F	adult	species	preserved specimen	AP	2019	Žan Kuralt
BMKR01136	KROK38	Araneae	Harpactea lepida (C. L. Koch, 1838)	M	adult	species	preserved specimen	AP	2019	Žan Kuralt
BMKR01137	KROK38	Araneae	Harpactea lepida (C. L. Koch, 1838)	M	adult	species	preserved specimen	AP	2019	Žan Kuralt
BMKR01138	KROK38	Araneae	Harpactea lepida (C. L. Koch, 1838)	M	adult	species	preserved specimen	AP	2019	Žan Kuralt
BMKR01139	KROK38	Araneae	Harpactea lepida (C. L. Koch, 1838)	M	adult	species	preserved specimen	AP	2019	Žan Kuralt
BMKR01140	KROK38	Araneae	Harpactea lepida (C. L. Koch, 1838)	M	adult	species	preserved specimen	AP	2019	Žan Kuralt
BMKR01141	KROK38	Araneae	Harpactea lepida (C. L. Koch, 1838)	M	adult	species	preserved specimen	AP	2019	Žan Kuralt
BMKR01142	KROK38	Araneae	Harpactea lepida (C. L. Koch, 1838)	M	adult	species	preserved specimen	AP	2019	Žan Kuralt
BMKR01143	KROK38	Araneae	Harpactea lepida (C. L. Koch, 1838)	F	adult	species	preserved specimen	AP	2019	Žan Kuralt
BMKR01144	KROK38	Araneae	Harpactea lepida (C. L. Koch, 1838)	F	adult	species	preserved specimen	AP	2019	Žan Kuralt
BMKR01145	KROK38	Araneae	Harpactea lepida (C. L. Koch, 1838)	F	adult	species	preserved specimen	AP	2019	Žan Kuralt
BMKR01146	KROK38	Araneae	Harpactea lepida (C. L. Koch, 1838)	F	adult	species	preserved specimen	AP	2019	Žan Kuralt
BMKR01147	KROK38	Araneae	Histopona luxurians (Kulczynski, 1897)	M	adult	species	preserved specimen	AP	2019	Žan Kuralt
BMKR01148	KROK38	Araneae	Inermocoelotes inermis (L. Koch, 1855)	M	adult	species	preserved specimen	AP	2019	Žan Kuralt
BMKR01149	KROK38	Araneae	Inermocoelotes inermis (L. Koch, 1855)	M	adult	species	preserved specimen	AP	2019	Žan Kuralt
BMKR01150	KROK38	Araneae	Inermocoelotes inermis (L. Koch, 1855)	M	adult	species	preserved specimen	AP	2019	Žan Kuralt
BMKR01151	KROK38	Araneae	Inermocoelotes inermis (L. Koch, 1855)	M	adult	species	preserved specimen	AP	2019	Žan Kuralt
BMKR01152	KROK38	Araneae	Inermocoelotes inermis (L. Koch, 1855)	M	adult	species	preserved specimen	AP	2019	Žan Kuralt
BMKR01153	KROK38	Araneae	Inermocoelotes inermis (L. Koch, 1855)	M	adult	species	preserved specimen	AP	2019	Žan Kuralt
BMKR01154	KROK38	Araneae	Inermocoelotes inermis (L. Koch, 1855)	M	adult	species	preserved specimen	AP	2019	Žan Kuralt
BMKR01155	KROK38	Araneae	Inermocoelotes inermis (L. Koch, 1855)	M	adult	species	preserved specimen	AP	2019	Žan Kuralt
BMKR01156	KROK38	Araneae	Inermocoelotes inermis (L. Koch, 1855)	M	adult	species	preserved specimen	AP	2019	Žan Kuralt
BMKR01157	KROK38	Araneae	Inermocoelotes inermis (L. Koch, 1855)	M	adult	species	preserved specimen	AP	2019	Žan Kuralt
BMKR01158	KROK38	Araneae	Inermocoelotes inermis (L. Koch, 1855)	M	adult	species	preserved specimen	AP	2019	Žan Kuralt
BMKR01159	KROK38	Araneae	Inermocoelotes inermis (L. Koch, 1855)	M	adult	species	preserved specimen	AP	2019	Žan Kuralt
BMKR01160	KROK38	Araneae	Inermocoelotes inermis (L. Koch, 1855)	M	adult	species	preserved specimen	AP	2019	Žan Kuralt
BMKR01161	KROK38	Araneae	Inermocoelotes inermis (L. Koch, 1855)	M	adult	species	preserved specimen	AP	2019	Žan Kuralt
BMKR01162	KROK38	Araneae	Inermocoelotes inermis (L. Koch, 1855)	M	adult	species	preserved specimen	AP	2019	Žan Kuralt
BMKR01163	KROK38	Araneae	Inermocoelotes inermis (L. Koch, 1855)	M	adult	species	preserved specimen	AP	2019	Žan Kuralt
BMKR01164	KROK38	Araneae	Inermocoelotes inermis (L. Koch, 1855)	F	adult	species	preserved specimen	AP	2019	Žan Kuralt
BMKR01165	KROK38	Araneae	Microneta viaria (Blackwall, 1841)	F	adult	species	preserved specimen	AP	2019	Žan Kuralt
BMKR01166	KROK38	Araneae	Microneta viaria (Blackwall, 1841)	M	adult	species	preserved specimen	AP	2019	Žan Kuralt
BMKR01167	KROK38	Araneae	Microneta viaria (Blackwall, 1841)	M	adult	species	preserved specimen	AP	2019	Žan Kuralt
BMKR01168	KROK38	Araneae	Microneta viaria (Blackwall, 1841)	M	adult	species	preserved specimen	AP	2019	Žan Kuralt
BMKR01169	KROK38	Araneae	Tenuiphantes tenebricola (Wider, 1834)	F	adult	species	preserved specimen	AP	2019	Žan Kuralt
BMKR01170	KROK43	Araneae	Inermocoelotes anoplus (Kulczynski, 1897)	M	adult	species	preserved specimen	AP	2019	Žan Kuralt	KROK055-19	MT994108
BMKR01171	KROK39	Coleoptera	Molops striolatus (Fabricius, 1801)	F	adult	species	preserved specimen	AP	2019	Urška Ratajc
BMKR01172	KROK39	Coleoptera	Molops striolatus (Fabricius, 1801)	M	adult	species	preserved specimen	AP	2019	Urška Ratajc
BMKR01173	KROK39	Coleoptera	Pterostichus burmeisteri Heer, 1837	M	adult	species	preserved specimen	AP	2019	Urška Ratajc
BMKR01174	KROK39	Coleoptera	Pterostichus burmeisteri Heer, 1837	M	adult	species	preserved specimen	AP	2019	Urška Ratajc
BMKR01175	KROK39	Coleoptera	Pterostichus burmeisteri Heer, 1837	M	adult	species	preserved specimen	AP	2019	Urška Ratajc
BMKR01176	KROK40	Coleoptera	Carabus creutzeri Fabricius, 1801	F	adult	species	preserved specimen	AP	2019	Urška Ratajc
BMKR01177	KROK40	Coleoptera	Molops piceus (Panzer, 1793)	M	adult	species	preserved specimen	AP	2019	Urška Ratajc
BMKR01178	KROK40	Coleoptera	Molops piceus (Panzer, 1793)	M	adult	species	preserved specimen	AP	2019	Urška Ratajc
BMKR01179	KROK40	Coleoptera	Molops piceus (Panzer, 1793)	M	adult	species	preserved specimen	AP	2019	Urška Ratajc
BMKR01180	KROK40	Coleoptera	Pterostichus burmeisteri Heer, 1837	F	adult	species	preserved specimen	AP	2019	Urška Ratajc
BMKR01181	KROK40	Coleoptera	Pterostichus burmeisteri Heer, 1837	F	adult	species	preserved specimen	AP	2019	Urška Ratajc
BMKR01182	KROK40	Coleoptera	Pterostichus burmeisteri Heer, 1837	M	adult	species	preserved specimen	AP	2019	Urška Ratajc
BMKR01183	KROK40	Coleoptera	Pterostichus burmeisteri Heer, 1837	M	adult	species	preserved specimen	AP	2019	Urška Ratajc
BMKR01184	KROK40	Coleoptera	Pterostichus burmeisteri Heer, 1837	M	adult	species	preserved specimen	AP	2019	Urška Ratajc
BMKR01185	KROK40	Coleoptera	Pterostichus burmeisteri Heer, 1837	M	adult	species	preserved specimen	AP	2019	Urška Ratajc
BMKR01186	KROK38	Geophilomorpha	Strigamia acuminata (Leach, 1814)	M	adult	species	preserved specimen	AP	2019	Ivan Kos
BMKR01187	KROK38	Lithobiomorpha	Lithobius nodulipes Latzel, 1880	M	adult	species	preserved specimen	AP	2019	Ivan Kos
BMKR01188	KROK39	Araneae	Harpactea lepida (C. L. Koch, 1838)	M	adult	species	preserved specimen	AP	2019	Žan Kuralt
BMKR01189	KROK39	Araneae	Harpactea lepida (C. L. Koch, 1838)	M	adult	species	preserved specimen	AP	2019	Žan Kuralt
BMKR01190	KROK39	Araneae	Harpactea lepida (C. L. Koch, 1838)	M	adult	species	preserved specimen	AP	2019	Žan Kuralt
BMKR01191	KROK39	Araneae	Harpactea lepida (C. L. Koch, 1838)	M	adult	species	preserved specimen	AP	2019	Žan Kuralt
BMKR01192	KROK39	Araneae	Harpactea lepida (C. L. Koch, 1838)	F	adult	species	preserved specimen	AP	2019	Žan Kuralt
BMKR01193	KROK39	Araneae	Harpactea lepida (C. L. Koch, 1838)	F	adult	species	preserved specimen	AP	2019	Žan Kuralt
BMKR01194	KROK39	Araneae	Histopona luxurians (Kulczynski, 1897)	M	adult	species	preserved specimen	AP	2019	Žan Kuralt
BMKR01195	KROK39	Araneae	Histopona luxurians (Kulczynski, 1897)	M	adult	species	preserved specimen	AP	2019	Žan Kuralt
BMKR01196	KROK39	Araneae	Histopona luxurians (Kulczynski, 1897)	M	adult	species	preserved specimen	AP	2019	Žan Kuralt
BMKR01197	KROK39	Araneae	Histopona luxurians (Kulczynski, 1897)	M	adult	species	preserved specimen	AP	2019	Žan Kuralt
BMKR01198	KROK39	Araneae	Inermocoelotes inermis (L. Koch, 1855)	M	adult	species	preserved specimen	AP	2019	Žan Kuralt
BMKR01199	KROK39	Araneae	Inermocoelotes inermis (L. Koch, 1855)	M	adult	species	preserved specimen	AP	2019	Žan Kuralt
BMKR01200	KROK39	Araneae	Inermocoelotes inermis (L. Koch, 1855)	M	adult	species	preserved specimen	AP	2019	Žan Kuralt
BMKR01201	KROK39	Araneae	Inermocoelotes inermis (L. Koch, 1855)	M	adult	species	preserved specimen	AP	2019	Žan Kuralt
BMKR01202	KROK39	Araneae	Inermocoelotes inermis (L. Koch, 1855)	M	adult	species	preserved specimen	AP	2019	Žan Kuralt
BMKR01203	KROK39	Araneae	Inermocoelotes inermis (L. Koch, 1855)	M	adult	species	preserved specimen	AP	2019	Žan Kuralt
BMKR01204	KROK39	Araneae	Inermocoelotes inermis (L. Koch, 1855)	F	adult	species	preserved specimen	AP	2019	Žan Kuralt
BMKR01205	KROK39	Araneae	Microneta viaria (Blackwall, 1841)	M	adult	species	preserved specimen	AP	2019	Žan Kuralt
BMKR01206	KROK40	Coleoptera	Pterostichus burmeisteri Heer, 1837	M	adult	species	preserved specimen	AP	2019	Urška Ratajc
BMKR01207	KROK40	Coleoptera	Pterostichus burmeisteri Heer, 1837	M	adult	species	preserved specimen	AP	2019	Urška Ratajc
BMKR01208	KROK41	Coleoptera	Carabus catenulatus Scopoli, 1763	F	adult	species	preserved specimen	AP	2019	Urška Ratajc	KROK019-19	MT994072
BMKR01209	KROK43	Coleoptera	Molops striolatus (Fabricius, 1801)	M	adult	species	preserved specimen	AP	2019	Urška Ratajc
BMKR01210	KROK47	Araneae	Inermocoelotes anoplus (Kulczynski, 1897)	F	adult	species	preserved specimen	AP	2019	Žan Kuralt
BMKR01211	KROK39	Lithobiomorpha	Eupolybothrus tridentinus (Fanzago, 1874)	F	adult	species	preserved specimen	AP	2019	Ivan Kos
BMKR01212	KROK40	Araneae	Centrophantes roeweri (Wiehle, 1961)	F	adult	species	preserved specimen	AP	2019	Žan Kuralt
BMKR01213	KROK40	Araneae	Centrophantes roeweri (Wiehle, 1961)	F	adult	species	preserved specimen	AP	2019	Žan Kuralt
BMKR01214	KROK40	Araneae	Centrophantes roeweri (Wiehle, 1961)	F	adult	species	preserved specimen	AP	2019	Žan Kuralt
BMKR01215	KROK40	Araneae	Harpactea lepida (C. L. Koch, 1838)	M	adult	species	preserved specimen	AP	2019	Žan Kuralt
BMKR01216	KROK40	Araneae	Harpactea lepida (C. L. Koch, 1838)	M	adult	species	preserved specimen	AP	2019	Žan Kuralt
BMKR01217	KROK40	Araneae	Harpactea lepida (C. L. Koch, 1838)	M	adult	species	preserved specimen	AP	2019	Žan Kuralt
BMKR01218	KROK40	Araneae	Harpactea lepida (C. L. Koch, 1838)	M	adult	species	preserved specimen	AP	2019	Žan Kuralt
BMKR01219	KROK40	Araneae	Harpactea lepida (C. L. Koch, 1838)	M	adult	species	preserved specimen	AP	2019	Žan Kuralt
BMKR01220	KROK40	Araneae	Harpactea lepida (C. L. Koch, 1838)	M	adult	species	preserved specimen	AP	2019	Žan Kuralt
BMKR01221	KROK40	Araneae	Histopona luxurians (Kulczynski, 1897)	M	adult	species	preserved specimen	AP	2019	Žan Kuralt
BMKR01222	KROK40	Araneae	Inermocoelotes inermis (L. Koch, 1855)	M	adult	species	preserved specimen	AP	2019	Žan Kuralt
BMKR01223	KROK40	Araneae	Inermocoelotes inermis (L. Koch, 1855)	M	adult	species	preserved specimen	AP	2019	Žan Kuralt
BMKR01224	KROK40	Araneae	Inermocoelotes inermis (L. Koch, 1855)	M	adult	species	preserved specimen	AP	2019	Žan Kuralt
BMKR01225	KROK40	Araneae	Inermocoelotes inermis (L. Koch, 1855)	M	adult	species	preserved specimen	AP	2019	Žan Kuralt
BMKR01226	KROK40	Araneae	Inermocoelotes inermis (L. Koch, 1855)	M	adult	species	preserved specimen	AP	2019	Žan Kuralt
BMKR01227	KROK40	Araneae	Inermocoelotes inermis (L. Koch, 1855)	M	adult	species	preserved specimen	AP	2019	Žan Kuralt
BMKR01228	KROK40	Araneae	Inermocoelotes inermis (L. Koch, 1855)	M	adult	species	preserved specimen	AP	2019	Žan Kuralt
BMKR01229	KROK40	Araneae	Inermocoelotes inermis (L. Koch, 1855)	M	adult	species	preserved specimen	AP	2019	Žan Kuralt
BMKR01230	KROK40	Araneae	Inermocoelotes inermis (L. Koch, 1855)	M	adult	species	preserved specimen	AP	2019	Žan Kuralt
BMKR01231	KROK40	Araneae	Inermocoelotes inermis (L. Koch, 1855)	M	adult	species	preserved specimen	AP	2019	Žan Kuralt
BMKR01232	KROK40	Araneae	Microneta viaria (Blackwall, 1841)	M	adult	species	preserved specimen	AP	2019	Žan Kuralt
BMKR01233	KROK40	Araneae	Microneta viaria (Blackwall, 1841)	M	adult	species	preserved specimen	AP	2019	Žan Kuralt
BMKR01234	KROK40	Araneae	Microneta viaria (Blackwall, 1841)	M	adult	species	preserved specimen	AP	2019	Žan Kuralt
BMKR01235	KROK40	Araneae	Microneta viaria (Blackwall, 1841)	M	adult	species	preserved specimen	AP	2019	Žan Kuralt
BMKR01236	KROK44	Coleoptera	Stenichnus collaris (Müller, P.W.J. & Kunze, 1822)			species	preserved specimen	AP	2019	Urška Ratajc	KROK014-19	MT994142
BMKR01237	KROK44	Coleoptera	Molops striolatus (Fabricius, 1801)	M	adult	species	preserved specimen	AP	2019	Urška Ratajc	KROK015-19	MT994128
BMKR01238	KROK44	Coleoptera	Abax ovalis (Duftschmid, 1812)	F	adult	species	preserved specimen	AP	2019	Urška Ratajc
BMKR01239	KROK44	Coleoptera	Molops striolatus (Fabricius, 1801)	M	adult	species	preserved specimen	AP	2019	Urška Ratajc
BMKR01240	KROK44	Coleoptera	Molops striolatus (Fabricius, 1801)	M	adult	species	preserved specimen	AP	2019	Urška Ratajc
BMKR01241	KROK44	Coleoptera	Molops striolatus (Fabricius, 1801)	F	adult	species	preserved specimen	AP	2019	Urška Ratajc
BMKR01242	KROK40	Lithobiomorpha	Lithobius pygmaeus Latzel, 1880	F	adult	species	preserved specimen	AP	2019	Ivan Kos
BMKR01243	KROK41	Araneae	Amaurobius obustus L. Koch, 1868	M	adult	species	preserved specimen	AP	2019	Žan Kuralt
BMKR01244	KROK41	Araneae	Amaurobius obustus L. Koch, 1868	M	adult	species	preserved specimen	AP	2019	Žan Kuralt
BMKR01245	KROK41	Araneae	Amaurobius obustus L. Koch, 1868	M	adult	species	preserved specimen	AP	2019	Žan Kuralt
BMKR01246	KROK41	Araneae	Amaurobius obustus L. Koch, 1868	M	adult	species	preserved specimen	AP	2019	Žan Kuralt
BMKR01247	KROK41	Araneae	Amaurobius obustus L. Koch, 1868	M	adult	species	preserved specimen	AP	2019	Žan Kuralt
BMKR01248	KROK41	Araneae	Centrophantes roeweri (Wiehle, 1961)	F	adult	species	preserved specimen	AP	2019	Žan Kuralt
BMKR01249	KROK41	Araneae	Harpactea lepida (C. L. Koch, 1838)	M	adult	species	preserved specimen	AP	2019	Žan Kuralt
BMKR01250	KROK41	Araneae	Harpactea lepida (C. L. Koch, 1838)	M	adult	species	preserved specimen	AP	2019	Žan Kuralt
BMKR01251	KROK41	Araneae	Harpactea lepida (C. L. Koch, 1838)	M	adult	species	preserved specimen	AP	2019	Žan Kuralt
BMKR01252	KROK41	Araneae	Harpactea lepida (C. L. Koch, 1838)	M	adult	species	preserved specimen	AP	2019	Žan Kuralt
BMKR01253	KROK41	Araneae	Harpactea lepida (C. L. Koch, 1838)	M	adult	species	preserved specimen	AP	2019	Žan Kuralt
BMKR01254	KROK41	Araneae	Histopona luxurians (Kulczynski, 1897)	M	adult	species	preserved specimen	AP	2019	Žan Kuralt
BMKR01255	KROK41	Araneae	Histopona luxurians (Kulczynski, 1897)	M	adult	species	preserved specimen	AP	2019	Žan Kuralt
BMKR01256	KROK41	Araneae	Histopona luxurians (Kulczynski, 1897)	M	adult	species	preserved specimen	AP	2019	Žan Kuralt
BMKR01257	KROK41	Araneae	Histopona luxurians (Kulczynski, 1897)	M	adult	species	preserved specimen	AP	2019	Žan Kuralt
BMKR01258	KROK41	Araneae	Histopona luxurians (Kulczynski, 1897)	M	adult	species	preserved specimen	AP	2019	Žan Kuralt
BMKR01259	KROK43	Araneae	Inermocoelotes inermis (L. Koch, 1855)	F	adult	species	preserved specimen	AP	2019	Žan Kuralt
BMKR01260	KROK41	Araneae	Inermocoelotes inermis (L. Koch, 1855)	F	adult	species	preserved specimen	AP	2019	Žan Kuralt
BMKR01261	KROK41	Araneae	Inermocoelotes inermis (L. Koch, 1855)	M	adult	species	preserved specimen	AP	2019	Žan Kuralt
BMKR01262	KROK41	Araneae	Inermocoelotes inermis (L. Koch, 1855)	M	adult	species	preserved specimen	AP	2019	Žan Kuralt
BMKR01263	KROK41	Araneae	Inermocoelotes inermis (L. Koch, 1855)	M	adult	species	preserved specimen	AP	2019	Žan Kuralt
BMKR01264	KROK41	Araneae	Inermocoelotes inermis (L. Koch, 1855)	M	adult	species	preserved specimen	AP	2019	Žan Kuralt
BMKR01265	KROK41	Araneae	Inermocoelotes inermis (L. Koch, 1855)	M	adult	species	preserved specimen	AP	2019	Žan Kuralt
BMKR01266	KROK41	Araneae	Inermocoelotes inermis (L. Koch, 1855)	M	adult	species	preserved specimen	AP	2019	Žan Kuralt
BMKR01267	KROK41	Araneae	Inermocoelotes inermis (L. Koch, 1855)	M	adult	species	preserved specimen	AP	2019	Žan Kuralt
BMKR01268	KROK41	Araneae	Microneta viaria (Blackwall, 1841)	M	adult	species	preserved specimen	AP	2019	Žan Kuralt
BMKR01269	KROK41	Araneae	Microneta viaria (Blackwall, 1841)	M	adult	species	preserved specimen	AP	2019	Žan Kuralt
BMKR01270	KROK41	Araneae	Microneta viaria (Blackwall, 1841)	M	adult	species	preserved specimen	AP	2019	Žan Kuralt
BMKR01271	KROK41	Araneae	Microneta viaria (Blackwall, 1841)	F	adult	species	preserved specimen	AP	2019	Žan Kuralt
BMKR01272	KROK41	Araneae	Microneta viaria (Blackwall, 1841)	F	adult	species	preserved specimen	AP	2019	Žan Kuralt
BMKR01273	KROK41	Araneae	Microneta viaria (Blackwall, 1841)	F	adult	species	preserved specimen	AP	2019	Žan Kuralt
BMKR01274	KROK41	Araneae	Tenuiphantes tenebricola (Wider, 1834)	M	adult	species	preserved specimen	AP	2019	Žan Kuralt
BMKR01275	KROK50	Araneae	Inermocoelotes inermis (L. Koch, 1855)	F	adult	species	preserved specimen	AP	2019	Žan Kuralt
BMKR01276	KROK41	Geophilomorpha	Strigamia acuminata (Leach, 1814)	M	adult	species	preserved specimen	AP	2019	Ivan Kos
BMKR01277	KROK41	Lithobiomorpha	Eupolybothrus tridentinus (Fanzago, 1874)	F	adult	species	preserved specimen	AP	2019	Ivan Kos
BMKR01278	KROK41	Lithobiomorpha	Eupolybothrus tridentinus (Fanzago, 1874)	F	adult	species	preserved specimen	AP	2019	Ivan Kos
BMKR01279	KROK41	Lithobiomorpha	Lithobius dentatus C.L.Koch, 1844	F	adult	species	preserved specimen	AP	2019	Ivan Kos
BMKR01280	KROK41	Lithobiomorpha	Lithobius dentatus C.L.Koch, 1844	F	adult	species	preserved specimen	AP	2019	Ivan Kos
BMKR01281	KROK54	Araneae	Inermocoelotes inermis (L. Koch, 1855)	F	adult	species	preserved specimen	AP	2019	Žan Kuralt	KROK056-19	MT994109
BMKR01282	KROK42	Araneae	Amaurobius obustus L. Koch, 1868	M	adult	species	preserved specimen	AP	2019	Žan Kuralt
BMKR01283	KROK56	Araneae	Inermocoelotes inermis (L. Koch, 1855)	M	adult	species	preserved specimen	AP	2019	Žan Kuralt
BMKR01284	KROK57	Araneae	Inermocoelotes inermis (L. Koch, 1855)	M	adult	species	preserved specimen	AP	2019	Žan Kuralt	KROK132-20	OL874956
BMKR01285	KROK53	Araneae	Inermocoelotes inermis (L. Koch, 1855)	M	adult	species	preserved specimen	AP	2019	Žan Kuralt
BMKR01286	KROK42	Araneae	Harpactea lepida (C. L. Koch, 1838)	M	adult	species	preserved specimen	AP	2019	Žan Kuralt
BMKR01287	KROK42	Araneae	Harpactea lepida (C. L. Koch, 1838)	M	adult	species	preserved specimen	AP	2019	Žan Kuralt
BMKR01288	KROK42	Araneae	Harpactea lepida (C. L. Koch, 1838)	M	adult	species	preserved specimen	AP	2019	Žan Kuralt
BMKR01289	KROK42	Araneae	Harpactea lepida (C. L. Koch, 1838)	M	adult	species	preserved specimen	AP	2019	Žan Kuralt
BMKR01290	KROK42	Araneae	Harpactea lepida (C. L. Koch, 1838)	M	adult	species	preserved specimen	AP	2019	Žan Kuralt
BMKR01291	KROK42	Araneae	Harpactea lepida (C. L. Koch, 1838)	M	adult	species	preserved specimen	AP	2019	Žan Kuralt
BMKR01292	KROK42	Araneae	Harpactea lepida (C. L. Koch, 1838)	M	adult	species	preserved specimen	AP	2019	Žan Kuralt
BMKR01293	KROK42	Araneae	Harpactea lepida (C. L. Koch, 1838)	M	adult	species	preserved specimen	AP	2019	Žan Kuralt
BMKR01294	KROK42	Araneae	Harpactea lepida (C. L. Koch, 1838)	F	adult	species	preserved specimen	AP	2019	Žan Kuralt
BMKR01295	KROK42	Araneae	Harpactea lepida (C. L. Koch, 1838)	F	adult	species	preserved specimen	AP	2019	Žan Kuralt
BMKR01296	KROK42	Araneae	Histopona luxurians (Kulczynski, 1897)	M	adult	species	preserved specimen	AP	2019	Žan Kuralt
BMKR01297	KROK42	Araneae	Histopona luxurians (Kulczynski, 1897)	M	adult	species	preserved specimen	AP	2019	Žan Kuralt
BMKR01298	KROK42	Araneae	Histopona luxurians (Kulczynski, 1897)	M	adult	species	preserved specimen	AP	2019	Žan Kuralt
BMKR01299	KROK42	Araneae	Histopona luxurians (Kulczynski, 1897)	M	adult	species	preserved specimen	AP	2019	Žan Kuralt
BMKR01300	KROK42	Araneae	Histopona luxurians (Kulczynski, 1897)	M	adult	species	preserved specimen	AP	2019	Žan Kuralt
BMKR01301	KROK42	Araneae	Histopona luxurians (Kulczynski, 1897)	M	adult	species	preserved specimen	AP	2019	Žan Kuralt
BMKR01302	KROK42	Araneae	Inermocoelotes inermis (L. Koch, 1855)	M	adult	species	preserved specimen	AP	2019	Žan Kuralt
BMKR01303	KROK42	Araneae	Inermocoelotes inermis (L. Koch, 1855)	M	adult	species	preserved specimen	AP	2019	Žan Kuralt
BMKR01304	KROK42	Araneae	Inermocoelotes inermis (L. Koch, 1855)	M	adult	species	preserved specimen	AP	2019	Žan Kuralt
BMKR01305	KROK42	Araneae	Inermocoelotes inermis (L. Koch, 1855)	M	adult	species	preserved specimen	AP	2019	Žan Kuralt
BMKR01306	KROK42	Araneae	Inermocoelotes inermis (L. Koch, 1855)	M	adult	species	preserved specimen	AP	2019	Žan Kuralt
BMKR01307	KROK42	Araneae	Inermocoelotes inermis (L. Koch, 1855)	M	adult	species	preserved specimen	AP	2019	Žan Kuralt
BMKR01308	KROK42	Araneae	Inermocoelotes inermis (L. Koch, 1855)	M	adult	species	preserved specimen	AP	2019	Žan Kuralt
BMKR01309	KROK42	Araneae	Inermocoelotes inermis (L. Koch, 1855)	M	adult	species	preserved specimen	AP	2019	Žan Kuralt
BMKR01310	KROK42	Araneae	Inermocoelotes inermis (L. Koch, 1855)	M	adult	species	preserved specimen	AP	2019	Žan Kuralt
BMKR01311	KROK42	Araneae	Inermocoelotes inermis (L. Koch, 1855)	M	adult	species	preserved specimen	AP	2019	Žan Kuralt
BMKR01312	KROK42	Araneae	Inermocoelotes inermis (L. Koch, 1855)	M	adult	species	preserved specimen	AP	2019	Žan Kuralt
BMKR01313	KROK42	Araneae	Inermocoelotes inermis (L. Koch, 1855)	M	adult	species	preserved specimen	AP	2019	Žan Kuralt
BMKR01314	KROK42	Araneae	Inermocoelotes inermis (L. Koch, 1855)	M	adult	species	preserved specimen	AP	2019	Žan Kuralt
BMKR01315	KROK42	Araneae	Inermocoelotes inermis (L. Koch, 1855)	M	adult	species	preserved specimen	AP	2019	Žan Kuralt
BMKR01316	KROK42	Araneae	Inermocoelotes inermis (L. Koch, 1855)	M	adult	species	preserved specimen	AP	2019	Žan Kuralt
BMKR01317	KROK42	Araneae	Inermocoelotes inermis (L. Koch, 1855)	M	adult	species	preserved specimen	AP	2019	Žan Kuralt
BMKR01318	KROK42	Araneae	Inermocoelotes inermis (L. Koch, 1855)	M	adult	species	preserved specimen	AP	2019	Žan Kuralt
BMKR01319	KROK42	Araneae	Inermocoelotes inermis (L. Koch, 1855)	M	adult	species	preserved specimen	AP	2019	Žan Kuralt
BMKR01320	KROK42	Araneae	Inermocoelotes inermis (L. Koch, 1855)	M	adult	species	preserved specimen	AP	2019	Žan Kuralt
BMKR01321	KROK42	Araneae	Inermocoelotes inermis (L. Koch, 1855)	M	adult	species	preserved specimen	AP	2019	Žan Kuralt
BMKR01322	KROK42	Araneae	Inermocoelotes inermis (L. Koch, 1855)	M	adult	species	preserved specimen	AP	2019	Žan Kuralt
BMKR01323	KROK42	Araneae	Inermocoelotes inermis (L. Koch, 1855)	M	adult	species	preserved specimen	AP	2019	Žan Kuralt
BMKR01324	KROK42	Araneae	Inermocoelotes inermis (L. Koch, 1855)	M	adult	species	preserved specimen	AP	2019	Žan Kuralt
BMKR01325	KROK42	Araneae	Microneta viaria (Blackwall, 1841)	M	adult	species	preserved specimen	AP	2019	Žan Kuralt
BMKR01326	KROK42	Araneae	Tegenaria silvestris L. Koch, 1872	M	adult	species	preserved specimen	AP	2019	Žan Kuralt	KROK057-19	MT994145
BMKR01327	KROK42	Araneae	Tenuiphantes tenebricola (Wider, 1834)	F	adult	species	preserved specimen	AP	2019	Žan Kuralt
BMKR01328	KROK42	Araneae	Tenuiphantes tenebricola (Wider, 1834)	F	adult	species	preserved specimen	AP	2019	Žan Kuralt
BMKR01329	KROK42	Araneae	Tenuiphantes tenebricola (Wider, 1834)	F	adult	species	preserved specimen	AP	2019	Žan Kuralt
BMKR01330	KROK42	Araneae	Tenuiphantes tenebricola (Wider, 1834)	F	adult	species	preserved specimen	AP	2019	Žan Kuralt
BMKR01331	KROK42	Araneae	Tenuiphantes tenebricola (Wider, 1834)	M	adult	species	preserved specimen	AP	2019	Žan Kuralt
BMKR01332	KROK42	Araneae	Tenuiphantes tenebricola (Wider, 1834)	M	adult	species	preserved specimen	AP	2019	Žan Kuralt
BMKR01333	KROK42	Lithobiomorpha	Lithobius tenebrosus Meinert, 1872	F	adult	species	preserved specimen	AP	2019	Ivan Kos
BMKR01334	KROK46	Araneae	Tegenaria silvestris L. Koch, 1872	F	adult	species	preserved specimen	AP	2019	Žan Kuralt
BMKR01335	KROK59	Araneae	Tegenaria silvestris L. Koch, 1872	M	adult	species	preserved specimen	AP	2019	Žan Kuralt	KROK133-20	OL874981
BMKR01336	KROK43	Araneae	Harpactea lepida (C. L. Koch, 1838)	M	adult	species	preserved specimen	AP	2019	Žan Kuralt
BMKR01337	KROK43	Araneae	Harpactea lepida (C. L. Koch, 1838)	M	adult	species	preserved specimen	AP	2019	Žan Kuralt
BMKR01338	KROK43	Araneae	Harpactea lepida (C. L. Koch, 1838)	M	adult	species	preserved specimen	AP	2019	Žan Kuralt
BMKR01339	KROK43	Araneae	Harpactea lepida (C. L. Koch, 1838)	M	adult	species	preserved specimen	AP	2019	Žan Kuralt
BMKR01340	KROK43	Araneae	Harpactea lepida (C. L. Koch, 1838)	M	adult	species	preserved specimen	AP	2019	Žan Kuralt
BMKR01341	KROK43	Araneae	Harpactea lepida (C. L. Koch, 1838)	M	adult	species	preserved specimen	AP	2019	Žan Kuralt
BMKR01342	KROK43	Araneae	Harpactea lepida (C. L. Koch, 1838)	M	adult	species	preserved specimen	AP	2019	Žan Kuralt
BMKR01343	KROK43	Araneae	Harpactea lepida (C. L. Koch, 1838)	M	adult	species	preserved specimen	AP	2019	Žan Kuralt
BMKR01344	KROK43	Araneae	Harpactea lepida (C. L. Koch, 1838)	M	adult	species	preserved specimen	AP	2019	Žan Kuralt
BMKR01345	KROK43	Araneae	Harpactea lepida (C. L. Koch, 1838)	F	adult	species	preserved specimen	AP	2019	Žan Kuralt
BMKR01346	KROK43	Araneae	Harpactea lepida (C. L. Koch, 1838)	F	adult	species	preserved specimen	AP	2019	Žan Kuralt
BMKR01347	KROK43	Araneae	Harpactea lepida (C. L. Koch, 1838)	F	adult	species	preserved specimen	AP	2019	Žan Kuralt
BMKR01348	KROK43	Araneae	Harpactea lepida (C. L. Koch, 1838)	F	adult	species	preserved specimen	AP	2019	Žan Kuralt
BMKR01349	KROK43	Araneae	Histopona luxurians (Kulczynski, 1897)	M	adult	species	preserved specimen	AP	2019	Žan Kuralt
BMKR01350	KROK43	Araneae	Histopona luxurians (Kulczynski, 1897)	M	adult	species	preserved specimen	AP	2019	Žan Kuralt
BMKR01351	KROK43	Araneae	Histopona luxurians (Kulczynski, 1897)	M	adult	species	preserved specimen	AP	2019	Žan Kuralt
BMKR01352	KROK43	Araneae	Histopona luxurians (Kulczynski, 1897)	M	adult	species	preserved specimen	AP	2019	Žan Kuralt
BMKR01353	KROK43	Araneae	Histopona luxurians (Kulczynski, 1897)	M	adult	species	preserved specimen	AP	2019	Žan Kuralt
BMKR01354	KROK43	Araneae	Histopona luxurians (Kulczynski, 1897)	M	adult	species	preserved specimen	AP	2019	Žan Kuralt
BMKR01355	KROK43	Araneae	Histopona luxurians (Kulczynski, 1897)	M	adult	species	preserved specimen	AP	2019	Žan Kuralt
BMKR01356	KROK43	Araneae	Inermocoelotes inermis (L. Koch, 1855)	M	adult	species	preserved specimen	AP	2019	Žan Kuralt
BMKR01357	KROK43	Araneae	Inermocoelotes inermis (L. Koch, 1855)	M	adult	species	preserved specimen	AP	2019	Žan Kuralt
BMKR01358	KROK43	Araneae	Inermocoelotes inermis (L. Koch, 1855)	M	adult	species	preserved specimen	AP	2019	Žan Kuralt
BMKR01359	KROK42	Araneae	Amaurobius obustus L. Koch, 1868	M	adult	species	preserved specimen	AP	2019	Žan Kuralt
BMKR01360	KROK43	Araneae	Microneta viaria (Blackwall, 1841)	M	adult	species	preserved specimen	AP	2019	Žan Kuralt
BMKR01361	KROK43	Araneae	Microneta viaria (Blackwall, 1841)	M	adult	species	preserved specimen	AP	2019	Žan Kuralt
BMKR01362	KROK43	Araneae	Microneta viaria (Blackwall, 1841)	M	adult	species	preserved specimen	AP	2019	Žan Kuralt
BMKR01363	KROK43	Araneae	Microneta viaria (Blackwall, 1841)	M	adult	species	preserved specimen	AP	2019	Žan Kuralt
BMKR01364	KROK43	Araneae	Microneta viaria (Blackwall, 1841)	M	adult	species	preserved specimen	AP	2019	Žan Kuralt
BMKR01365	KROK43	Araneae	Microneta viaria (Blackwall, 1841)	M	adult	species	preserved specimen	AP	2019	Žan Kuralt
BMKR01366	KROK43	Araneae	Pardosa alacris C.L. Koch, 1833	M	adult	species	preserved specimen	AP	2019	Žan Kuralt
BMKR01367	KROK43	Araneae	Pardosa alacris C.L. Koch, 1833	M	adult	species	preserved specimen	AP	2019	Žan Kuralt
BMKR01368	KROK43	Araneae	Pardosa alacris C.L. Koch, 1833	M	adult	species	preserved specimen	AP	2019	Žan Kuralt
BMKR01369	KROK43	Araneae	Amaurobius obustus L. Koch, 1868	F	adult	species	preserved specimen	AP	2019	Žan Kuralt	KROK134-20	OL874923
BMKR01370	KROK54	Araneae	Amaurobius obustus L. Koch, 1868	F	adult	species	preserved specimen	AP	2019	Žan Kuralt
BMKR01371	KROK54	Araneae	Amaurobius obustus L. Koch, 1868	M	adult	species	preserved specimen	AP	2019	Žan Kuralt
BMKR01372	KROK55	Araneae	Amaurobius obustus L. Koch, 1868	M	adult	species	preserved specimen	AP	2019	Žan Kuralt	KROK058-19	MT994070
BMKR01373	KROK45	Coleoptera	Pterostichus burmeisteri Heer, 1837	M	adult	species	preserved specimen	AP	2019	Urška Ratajc
BMKR01374	KROK45	Coleoptera	Pterostichus burmeisteri Heer, 1837	M	adult	species	preserved specimen	AP	2019	Urška Ratajc
BMKR01375	KROK60	Araneae	Amaurobius obustus L. Koch, 1868	M	adult	species	preserved specimen	AP	2019	Žan Kuralt
BMKR01376	KROK14	Araneae	Comaroma simoni Bertkau, 1889	M	adult	species	preserved specimen	AP	2019	Žan Kuralt
BMKR01377	KROK43	Lithobiomorpha	Lithobius pygmaeus Latzel, 1880	M	adult	species	preserved specimen	MP	2019	Ivan Kos
BMKR01378	KROK44	Araneae	Diplocephalus picinus (Blackwall, 1841)	M	adult	species	preserved specimen	AP	2019	Žan Kuralt
BMKR01379	KROK44	Araneae	Harpactea lepida (C. L. Koch, 1838)	M	adult	species	preserved specimen	AP	2019	Žan Kuralt
BMKR01380	KROK44	Araneae	Harpactea lepida (C. L. Koch, 1838)	M	adult	species	preserved specimen	AP	2019	Žan Kuralt
BMKR01381	KROK44	Araneae	Harpactea lepida (C. L. Koch, 1838)	M	adult	species	preserved specimen	AP	2019	Žan Kuralt
BMKR01382	KROK44	Araneae	Harpactea lepida (C. L. Koch, 1838)	F	adult	species	preserved specimen	AP	2019	Žan Kuralt
BMKR01383	KROK44	Araneae	Harpactea lepida (C. L. Koch, 1838)	F	adult	species	preserved specimen	AP	2019	Žan Kuralt
BMKR01384	KROK44	Araneae	Histopona luxurians (Kulczynski, 1897)	M	adult	species	preserved specimen	AP	2019	Žan Kuralt
BMKR01385	KROK44	Araneae	Histopona luxurians (Kulczynski, 1897)	M	adult	species	preserved specimen	AP	2019	Žan Kuralt
BMKR01386	KROK44	Araneae	Histopona luxurians (Kulczynski, 1897)	M	adult	species	preserved specimen	AP	2019	Žan Kuralt
BMKR01387	KROK44	Araneae	Histopona luxurians (Kulczynski, 1897)	M	adult	species	preserved specimen	AP	2019	Žan Kuralt
BMKR01388	KROK44	Araneae	Histopona luxurians (Kulczynski, 1897)	M	adult	species	preserved specimen	AP	2019	Žan Kuralt
BMKR01389	KROK44	Araneae	Histopona luxurians (Kulczynski, 1897)	M	adult	species	preserved specimen	AP	2019	Žan Kuralt
BMKR01390	KROK44	Araneae	Histopona luxurians (Kulczynski, 1897)	F	adult	species	preserved specimen	AP	2019	Žan Kuralt
BMKR01391	KROK44	Araneae	Inermocoelotes inermis (L. Koch, 1855)	M	adult	species	preserved specimen	AP	2019	Žan Kuralt
BMKR01392	KROK44	Araneae	Inermocoelotes inermis (L. Koch, 1855)	M	adult	species	preserved specimen	AP	2019	Žan Kuralt
BMKR01393	KROK44	Araneae	Inermocoelotes inermis (L. Koch, 1855)	M	adult	species	preserved specimen	AP	2019	Žan Kuralt
BMKR01394	KROK44	Araneae	Inermocoelotes inermis (L. Koch, 1855)	M	adult	species	preserved specimen	AP	2019	Žan Kuralt
BMKR01395	KROK44	Araneae	Inermocoelotes inermis (L. Koch, 1855)	M	adult	species	preserved specimen	AP	2019	Žan Kuralt
BMKR01396	KROK44	Araneae	Microneta viaria (Blackwall, 1841)	M	adult	species	preserved specimen	AP	2019	Žan Kuralt
BMKR01397	KROK44	Araneae	Microneta viaria (Blackwall, 1841)	M	adult	species	preserved specimen	AP	2019	Žan Kuralt
BMKR01398	KROK44	Araneae	Microneta viaria (Blackwall, 1841)	M	adult	species	preserved specimen	AP	2019	Žan Kuralt
BMKR01399	KROK44	Araneae	Microneta viaria (Blackwall, 1841)	M	adult	species	preserved specimen	AP	2019	Žan Kuralt
BMKR01400	KROK44	Araneae	Microneta viaria (Blackwall, 1841)	M	adult	species	preserved specimen	AP	2019	Žan Kuralt
BMKR01401	KROK44	Araneae	Pardosa alacris C.L. Koch, 1833	M	adult	species	preserved specimen	AP	2019	Žan Kuralt
BMKR01402	KROK44	Araneae	Pardosa alacris C.L. Koch, 1833	M	adult	species	preserved specimen	AP	2019	Žan Kuralt
BMKR01403	KROK44	Araneae	Pardosa alacris C.L. Koch, 1833	M	adult	species	preserved specimen	AP	2019	Žan Kuralt
BMKR01404	KROK44	Araneae	Pardosa alacris C.L. Koch, 1833	M	adult	species	preserved specimen	AP	2019	Žan Kuralt
BMKR01405	KROK44	Araneae	Pardosa alacris C.L. Koch, 1833	M	adult	species	preserved specimen	AP	2019	Žan Kuralt
BMKR01406	KROK44	Araneae	Tenuiphantes flavipes (Blackwall, 1854)	M	adult	species	preserved specimen	AP	2019	Žan Kuralt
BMKR01407	KROK44	Araneae	Tenuiphantes tenebricola (Wider, 1834)	M	adult	species	preserved specimen	AP	2019	Žan Kuralt
BMKR01408	KROK44	Araneae	Trochosa terricola Thorell, 1856	M	adult	species	preserved specimen	AP	2019	Žan Kuralt
BMKR01409	KROK14	Araneae	Comaroma simoni Bertkau, 1889	F	adult	species	preserved specimen	AP	2019	Žan Kuralt
BMKR01410	KROK44	Araneae	Walckenaeria simplex Chyzer, 1894	M	adult	species	preserved specimen	AP	2019	Žan Kuralt
BMKR01411	KROK44	Araneae	Zora nemoralis (Blackwall, 1861)	F	adult	species	preserved specimen	AP	2019	Žan Kuralt
BMKR01412	KROK44	Araneae	Centrophantes roeweri (Wiehle, 1961)	F	adult	species	preserved specimen	AP	2019	Žan Kuralt
BMKR01413	KROK45	Coleoptera	Pterostichus burmeisteri Heer, 1837	M	adult	species	preserved specimen	AP	2019	Urška Ratajc
BMKR01414	KROK31	Araneae	Comaroma simoni Bertkau, 1889	F	adult	species	preserved specimen	AP	2019	Žan Kuralt
BMKR01415	KROK45	Coleoptera	Pterostichus burmeisteri Heer, 1837	M	adult	species	preserved specimen	AP	2019	Urška Ratajc
BMKR01416	KROK45	Coleoptera	Pterostichus burmeisteri Heer, 1837	M	adult	species	preserved specimen	AP	2019	Urška Ratajc
BMKR01417	KROK31	Araneae	Comaroma simoni Bertkau, 1889	M	adult	species	preserved specimen	AP	2019	Žan Kuralt	KROK059-19	MT994083
BMKR01418	KROK33	Araneae	Comaroma simoni Bertkau, 1889	F	adult	species	preserved specimen	AP	2019	Žan Kuralt
BMKR01419	KROK46	Coleoptera	Platynus scrobiculatus (Fabricius, 1801)	F	adult	species	preserved specimen	AP	2019	Urška Ratajc	KROK022-19	MT994133
BMKR01420	KROK46	Coleoptera	Cychrus attenuatus (Fabricius, 1792)			species	preserved specimen	AP	2019	Urška Ratajc
BMKR01421	KROK46	Coleoptera	Molops piceus (Panzer, 1793)	F	adult	species	preserved specimen	AP	2019	Urška Ratajc
BMKR01422	KROK44	Lithobiomorpha	Eupolybothrus tridentinus (Fanzago, 1874)	F	adult	species	preserved specimen	AP	2019	Ivan Kos
BMKR01423	KROK45	Araneae	Amaurobius obustus L. Koch, 1868	M	adult	species	preserved specimen	AP	2019	Žan Kuralt
BMKR01424	KROK45	Araneae	Amaurobius obustus L. Koch, 1868	M	adult	species	preserved specimen	AP	2019	Žan Kuralt
BMKR01425	KROK45	Araneae	Amaurobius obustus L. Koch, 1868	M	adult	species	preserved specimen	AP	2019	Žan Kuralt
BMKR01426	KROK45	Araneae	Amaurobius obustus L. Koch, 1868	M	adult	species	preserved specimen	AP	2019	Žan Kuralt
BMKR01427	KROK15	Araneae	Comaroma simoni Bertkau, 1889	M	adult	species	preserved specimen	AP	2019	Žan Kuralt	KROK135-20	OL874932
BMKR01428	KROK15	Araneae	Comaroma simoni Bertkau, 1889	F	adult	species	preserved specimen	AP	2019	Žan Kuralt
BMKR01429	KROK15	Araneae	Comaroma simoni Bertkau, 1889	F	adult	species	preserved specimen	AP	2019	Žan Kuralt
BMKR01430	KROK03	Araneae	Araneus diadematus Clerck, 1757	F	adult	species	preserved specimen	AP	2019	Žan Kuralt	KROK136-20	OL874924
BMKR01431	KROK45	Araneae	Harpactea lepida (C. L. Koch, 1838)	M	adult	species	preserved specimen	AP	2019	Žan Kuralt
BMKR01432	KROK45	Araneae	Harpactea lepida (C. L. Koch, 1838)	M	adult	species	preserved specimen	AP	2019	Žan Kuralt
BMKR01433	KROK45	Araneae	Harpactea lepida (C. L. Koch, 1838)	M	adult	species	preserved specimen	AP	2019	Žan Kuralt
BMKR01434	KROK45	Araneae	Harpactea lepida (C. L. Koch, 1838)	M	adult	species	preserved specimen	AP	2019	Žan Kuralt
BMKR01435	KROK45	Araneae	Harpactea lepida (C. L. Koch, 1838)	M	adult	species	preserved specimen	AP	2019	Žan Kuralt
BMKR01436	KROK45	Araneae	Harpactea lepida (C. L. Koch, 1838)	M	adult	species	preserved specimen	AP	2019	Žan Kuralt
BMKR01437	KROK45	Araneae	Harpactea lepida (C. L. Koch, 1838)	F	adult	species	preserved specimen	AP	2019	Žan Kuralt
BMKR01438	KROK45	Araneae	Harpactea lepida (C. L. Koch, 1838)	F	adult	species	preserved specimen	AP	2019	Žan Kuralt
BMKR01439	KROK45	Araneae	Harpactea lepida (C. L. Koch, 1838)	F	adult	species	preserved specimen	AP	2019	Žan Kuralt
BMKR01440	KROK45	Araneae	Harpactea lepida (C. L. Koch, 1838)	F	adult	species	preserved specimen	AP	2019	Žan Kuralt
BMKR01441	KROK45	Araneae	Histopona luxurians (Kulczynski, 1897)	M	adult	species	preserved specimen	AP	2019	Žan Kuralt
BMKR01442	KROK45	Araneae	Histopona luxurians (Kulczynski, 1897)	M	adult	species	preserved specimen	AP	2019	Žan Kuralt
BMKR01443	KROK45	Araneae	Histopona luxurians (Kulczynski, 1897)	M	adult	species	preserved specimen	AP	2019	Žan Kuralt
BMKR01444	KROK45	Araneae	Histopona luxurians (Kulczynski, 1897)	M	adult	species	preserved specimen	AP	2019	Žan Kuralt
BMKR01445	KROK45	Araneae	Histopona luxurians (Kulczynski, 1897)	M	adult	species	preserved specimen	AP	2019	Žan Kuralt
BMKR01446	KROK45	Araneae	Histopona luxurians (Kulczynski, 1897)	M	adult	species	preserved specimen	AP	2019	Žan Kuralt
BMKR01447	KROK45	Araneae	Histopona luxurians (Kulczynski, 1897)	M	adult	species	preserved specimen	AP	2019	Žan Kuralt
BMKR01448	KROK45	Araneae	Histopona luxurians (Kulczynski, 1897)	M	adult	species	preserved specimen	AP	2019	Žan Kuralt
BMKR01449	KROK45	Araneae	Histopona luxurians (Kulczynski, 1897)	F	adult	species	preserved specimen	AP	2019	Žan Kuralt
BMKR01450	KROK38	Araneae	Clubiona terrestris Westring, 1851	M	adult	species	preserved specimen	AP	2019	Žan Kuralt	KROK060-19	MT994081
BMKR01451	KROK60	Araneae	Clubiona terrestris Westring, 1851	M	adult	species	preserved specimen	AP	2019	Žan Kuralt	KROK137-20	OL874930
BMKR01452	KROK45	Araneae	Inermocoelotes inermis (L. Koch, 1855)	M	adult	species	preserved specimen	AP	2019	Žan Kuralt
BMKR01453	KROK45	Araneae	Inermocoelotes inermis (L. Koch, 1855)	M	adult	species	preserved specimen	AP	2019	Žan Kuralt
BMKR01454	KROK45	Araneae	Inermocoelotes inermis (L. Koch, 1855)	M	adult	species	preserved specimen	AP	2019	Žan Kuralt
BMKR01455	KROK45	Araneae	Inermocoelotes inermis (L. Koch, 1855)	M	adult	species	preserved specimen	AP	2019	Žan Kuralt
BMKR01456	KROK45	Araneae	Inermocoelotes inermis (L. Koch, 1855)	M	adult	species	preserved specimen	AP	2019	Žan Kuralt
BMKR01457	KROK45	Araneae	Inermocoelotes inermis (L. Koch, 1855)	M	adult	species	preserved specimen	AP	2019	Žan Kuralt
BMKR01458	KROK45	Araneae	Inermocoelotes inermis (L. Koch, 1855)	M	adult	species	preserved specimen	AP	2019	Žan Kuralt
BMKR01459	KROK45	Araneae	Inermocoelotes inermis (L. Koch, 1855)	M	adult	species	preserved specimen	AP	2019	Žan Kuralt
BMKR01460	KROK45	Araneae	Inermocoelotes inermis (L. Koch, 1855)	M	adult	species	preserved specimen	AP	2019	Žan Kuralt
BMKR01461	KROK45	Araneae	Inermocoelotes inermis (L. Koch, 1855)	M	adult	species	preserved specimen	AP	2019	Žan Kuralt
BMKR01462	KROK45	Araneae	Inermocoelotes inermis (L. Koch, 1855)	M	adult	species	preserved specimen	AP	2019	Žan Kuralt
BMKR01463	KROK45	Araneae	Inermocoelotes inermis (L. Koch, 1855)	M	adult	species	preserved specimen	AP	2019	Žan Kuralt
BMKR01464	KROK45	Araneae	Inermocoelotes inermis (L. Koch, 1855)	M	adult	species	preserved specimen	AP	2019	Žan Kuralt
BMKR01465	KROK45	Araneae	Inermocoelotes inermis (L. Koch, 1855)	M	adult	species	preserved specimen	AP	2019	Žan Kuralt
BMKR01466	KROK45	Araneae	Inermocoelotes inermis (L. Koch, 1855)	M	adult	species	preserved specimen	AP	2019	Žan Kuralt
BMKR01467	KROK45	Araneae	Inermocoelotes inermis (L. Koch, 1855)	M	adult	species	preserved specimen	AP	2019	Žan Kuralt
BMKR01468	KROK45	Araneae	Inermocoelotes inermis (L. Koch, 1855)	M	adult	species	preserved specimen	AP	2019	Žan Kuralt
BMKR01469	KROK45	Araneae	Inermocoelotes inermis (L. Koch, 1855)	M	adult	species	preserved specimen	AP	2019	Žan Kuralt
BMKR01470	KROK45	Araneae	Inermocoelotes inermis (L. Koch, 1855)	M	adult	species	preserved specimen	AP	2019	Žan Kuralt
BMKR01471	KROK45	Araneae	Inermocoelotes inermis (L. Koch, 1855)	M	adult	species	preserved specimen	AP	2019	Žan Kuralt
BMKR01472	KROK45	Araneae	Microneta viaria (Blackwall, 1841)	M	adult	species	preserved specimen	AP	2019	Žan Kuralt
BMKR01473	KROK45	Araneae	Microneta viaria (Blackwall, 1841)	M	adult	species	preserved specimen	AP	2019	Žan Kuralt
BMKR01474	KROK45	Araneae	Microneta viaria (Blackwall, 1841)	M	adult	species	preserved specimen	AP	2019	Žan Kuralt
BMKR01475	KROK45	Araneae	Microneta viaria (Blackwall, 1841)	M	adult	species	preserved specimen	AP	2019	Žan Kuralt
BMKR01476	KROK45	Araneae	Microneta viaria (Blackwall, 1841)	M	adult	species	preserved specimen	AP	2019	Žan Kuralt
BMKR01477	KROK45	Araneae	Microneta viaria (Blackwall, 1841)	M	adult	species	preserved specimen	AP	2019	Žan Kuralt
BMKR01478	KROK45	Araneae	Microneta viaria (Blackwall, 1841)	M	adult	species	preserved specimen	AP	2019	Žan Kuralt
BMKR01479	KROK45	Araneae	Microneta viaria (Blackwall, 1841)	M	adult	species	preserved specimen	AP	2019	Žan Kuralt
BMKR01480	KROK45	Araneae	Microneta viaria (Blackwall, 1841)	F	adult	species	preserved specimen	AP	2019	Žan Kuralt
BMKR01481	KROK45	Araneae	Microneta viaria (Blackwall, 1841)	M	adult	species	preserved specimen	AP	2019	Žan Kuralt
BMKR01482	KROK45	Araneae	Microneta viaria (Blackwall, 1841)	M	adult	species	preserved specimen	AP	2019	Žan Kuralt
BMKR01483	KROK45	Araneae	Pardosa alacris C.L. Koch, 1833	M	adult	species	preserved specimen	AP	2019	Žan Kuralt
BMKR01484	KROK45	Araneae	Pardosa alacris C.L. Koch, 1833	M	adult	species	preserved specimen	AP	2019	Žan Kuralt
BMKR01485	KROK45	Araneae	Pardosa alacris C.L. Koch, 1833	M	adult	species	preserved specimen	AP	2019	Žan Kuralt
BMKR01486	KROK45	Araneae	Pardosa alacris C.L. Koch, 1833	M	adult	species	preserved specimen	AP	2019	Žan Kuralt
BMKR01487	KROK45	Araneae	Pardosa alacris C.L. Koch, 1833	M	adult	species	preserved specimen	AP	2019	Žan Kuralt
BMKR01488	KROK45	Araneae	Pardosa alacris C.L. Koch, 1833	M	adult	species	preserved specimen	AP	2019	Žan Kuralt
BMKR01489	KROK45	Araneae	Pardosa alacris C.L. Koch, 1833	M	adult	species	preserved specimen	AP	2019	Žan Kuralt
BMKR01490	KROK45	Araneae	Pardosa alacris C.L. Koch, 1833	M	adult	species	preserved specimen	AP	2019	Žan Kuralt
BMKR01491	KROK45	Araneae	Pardosa alacris C.L. Koch, 1833	M	adult	species	preserved specimen	AP	2019	Žan Kuralt
BMKR01492	KROK45	Araneae	Pardosa alacris C.L. Koch, 1833	M	adult	species	preserved specimen	AP	2019	Žan Kuralt
BMKR01493	KROK45	Araneae	Pardosa alacris C.L. Koch, 1833	M	adult	species	preserved specimen	AP	2019	Žan Kuralt
BMKR01494	KROK45	Araneae	Pardosa alacris C.L. Koch, 1833	M	adult	species	preserved specimen	AP	2019	Žan Kuralt
BMKR01495	KROK45	Araneae	Pardosa alacris C.L. Koch, 1833	M	adult	species	preserved specimen	AP	2019	Žan Kuralt
BMKR01496	KROK45	Araneae	Pardosa alacris C.L. Koch, 1833	M	adult	species	preserved specimen	AP	2019	Žan Kuralt
BMKR01497	KROK45	Araneae	Pardosa alacris C.L. Koch, 1833	M	adult	species	preserved specimen	AP	2019	Žan Kuralt
BMKR01498	KROK55	Araneae	Dasumia canestrinii (L. Koch, 1876)	M	adult	species	preserved specimen	AP	2019	Žan Kuralt	KROK061-19	MT994088
BMKR01499	KROK45	Araneae	Tenuiphantes tenebricola (Wider, 1834)	M	adult	species	preserved specimen	AP	2019	Žan Kuralt
BMKR01500	KROK45	Araneae	Tenuiphantes tenebricola (Wider, 1834)	M	adult	species	preserved specimen	AP	2019	Žan Kuralt
BMKR01501	KROK45	Araneae	Tenuiphantes tenebricola (Wider, 1834)	M	adult	species	preserved specimen	AP	2019	Žan Kuralt
BMKR01502	KROK45	Araneae	Tenuiphantes tenebricola (Wider, 1834)	M	adult	species	preserved specimen	AP	2019	Žan Kuralt
BMKR01503	KROK45	Araneae	Tenuiphantes tenebricola (Wider, 1834)	M	adult	species	preserved specimen	AP	2019	Žan Kuralt
BMKR01504	KROK45	Araneae	Tenuiphantes tenebricola (Wider, 1834)	M	adult	species	preserved specimen	AP	2019	Žan Kuralt
BMKR01505	KROK45	Araneae	Tenuiphantes tenebricola (Wider, 1834)	F	adult	species	preserved specimen	AP	2019	Žan Kuralt
BMKR01506	KROK45	Araneae	Trochosa terricola Thorell, 1856	M	adult	species	preserved specimen	AP	2019	Žan Kuralt
BMKR01507	KROK45	Araneae	Trochosa terricola Thorell, 1856	M	adult	species	preserved specimen	AP	2019	Žan Kuralt
BMKR01508	KROK45	Araneae	Centrophantes roeweri (Wiehle, 1961)	F	adult	species	preserved specimen	AP	2019	Žan Kuralt
BMKR01509	KROK56	Araneae	Dysdera adriatica Kulczynski, 1897	F	adult	species	preserved specimen	AP	2019	Žan Kuralt
BMKR01510	KROK46	Coleoptera	Pterostichus burmeisteri Heer, 1837	M	adult	species	preserved specimen	AP	2019	Urška Ratajc
BMKR01511	KROK46	Coleoptera	Pterostichus burmeisteri Heer, 1837	M	adult	species	preserved specimen	AP	2019	Urška Ratajc
BMKR01512	KROK46	Coleoptera	Pterostichus burmeisteri Heer, 1837	F	adult	species	preserved specimen	AP	2019	Urška Ratajc
BMKR01513	KROK48	Coleoptera	Dima elateroides Charpentier, 1825			species	preserved specimen	AP	2019	Urška Ratajc	KROK023-19	MT994091
BMKR01514	KROK48	Coleoptera	Abax carinatus (Duftschmid, 1812)	F	adult	species	preserved specimen	AP	2019	Urška Ratajc
BMKR01515	KROK48	Coleoptera	Abax ovalis (Duftschmid, 1812)	M	adult	species	preserved specimen	AP	2019	Urška Ratajc
BMKR01516	KROK45	Lithobiomorpha	Lithobius latro Meinert, 1872	M	adult	species	preserved specimen	AP	2019	Ivan Kos
BMKR01517	KROK45	Lithobiomorpha	Lithobius latro Meinert, 1872	F	adult	species	preserved specimen	AP	2019	Ivan Kos
BMKR01518	KROK45	Scolopendromorpha	Cryptops parisi Brölemann, 1920			species	preserved specimen	AP	2019	Ivan Kos
BMKR01519	KROK46	Araneae	Amaurobius obustus L. Koch, 1868	M	adult	species	preserved specimen	AP	2019	Žan Kuralt
BMKR01520	KROK46	Araneae	Amaurobius obustus L. Koch, 1868	M	adult	species	preserved specimen	AP	2019	Žan Kuralt
BMKR01521	KROK46	Araneae	Centrophantes roeweri (Wiehle, 1961)	F	adult	species	preserved specimen	AP	2019	Žan Kuralt
BMKR01522	KROK46	Araneae	Centrophantes roeweri (Wiehle, 1961)	F	adult	species	preserved specimen	AP	2019	Žan Kuralt
BMKR01523	KROK46	Araneae	Ceratinella brevis (Wider, 1834)	M	adult	species	preserved specimen	AP	2019	Žan Kuralt
BMKR01524	KROK46	Araneae	Harpactea lepida (C. L. Koch, 1838)	M	adult	species	preserved specimen	AP	2019	Žan Kuralt
BMKR01525	KROK46	Araneae	Harpactea lepida (C. L. Koch, 1838)	M	adult	species	preserved specimen	AP	2019	Žan Kuralt
BMKR01526	KROK46	Araneae	Harpactea lepida (C. L. Koch, 1838)	M	adult	species	preserved specimen	AP	2019	Žan Kuralt
BMKR01527	KROK46	Araneae	Harpactea lepida (C. L. Koch, 1838)	M	adult	species	preserved specimen	AP	2019	Žan Kuralt
BMKR01528	KROK46	Araneae	Harpactea lepida (C. L. Koch, 1838)	F	adult	species	preserved specimen	AP	2019	Žan Kuralt
BMKR01529	KROK46	Araneae	Histopona luxurians (Kulczynski, 1897)	M	adult	species	preserved specimen	AP	2019	Žan Kuralt
BMKR01530	KROK46	Araneae	Histopona luxurians (Kulczynski, 1897)	M	adult	species	preserved specimen	AP	2019	Žan Kuralt
BMKR01531	KROK46	Araneae	Histopona luxurians (Kulczynski, 1897)	M	adult	species	preserved specimen	AP	2019	Žan Kuralt
BMKR01532	KROK46	Araneae	Histopona luxurians (Kulczynski, 1897)	M	adult	species	preserved specimen	AP	2019	Žan Kuralt
BMKR01533	KROK46	Araneae	Histopona luxurians (Kulczynski, 1897)	M	adult	species	preserved specimen	AP	2019	Žan Kuralt
BMKR01534	KROK46	Araneae	Histopona luxurians (Kulczynski, 1897)	M	adult	species	preserved specimen	AP	2019	Žan Kuralt
BMKR01535	KROK46	Araneae	Histopona luxurians (Kulczynski, 1897)	M	adult	species	preserved specimen	AP	2019	Žan Kuralt
BMKR01536	KROK46	Araneae	Histopona luxurians (Kulczynski, 1897)	M	adult	species	preserved specimen	AP	2019	Žan Kuralt
BMKR01537	KROK46	Araneae	Histopona luxurians (Kulczynski, 1897)	M	adult	species	preserved specimen	AP	2019	Žan Kuralt
BMKR01538	KROK46	Araneae	Histopona luxurians (Kulczynski, 1897)	M	adult	species	preserved specimen	AP	2019	Žan Kuralt
BMKR01539	KROK46	Araneae	Histopona luxurians (Kulczynski, 1897)	M	adult	species	preserved specimen	AP	2019	Žan Kuralt
BMKR01540	KROK46	Araneae	Histopona luxurians (Kulczynski, 1897)	M	adult	species	preserved specimen	AP	2019	Žan Kuralt
BMKR01541	KROK46	Araneae	Histopona luxurians (Kulczynski, 1897)	M	adult	species	preserved specimen	AP	2019	Žan Kuralt
BMKR01542	KROK46	Araneae	Histopona luxurians (Kulczynski, 1897)	M	adult	species	preserved specimen	AP	2019	Žan Kuralt
BMKR01543	KROK46	Araneae	Inermocoelotes inermis (L. Koch, 1855)	M	adult	species	preserved specimen	AP	2019	Žan Kuralt
BMKR01544	KROK46	Araneae	Inermocoelotes inermis (L. Koch, 1855)	M	adult	species	preserved specimen	AP	2019	Žan Kuralt
BMKR01545	KROK46	Araneae	Inermocoelotes inermis (L. Koch, 1855)	M	adult	species	preserved specimen	AP	2019	Žan Kuralt
BMKR01546	KROK46	Araneae	Inermocoelotes inermis (L. Koch, 1855)	M	adult	species	preserved specimen	AP	2019	Žan Kuralt
BMKR01547	KROK46	Araneae	Inermocoelotes inermis (L. Koch, 1855)	M	adult	species	preserved specimen	AP	2019	Žan Kuralt
BMKR01548	KROK46	Araneae	Inermocoelotes inermis (L. Koch, 1855)	M	adult	species	preserved specimen	AP	2019	Žan Kuralt
BMKR01549	KROK46	Araneae	Inermocoelotes inermis (L. Koch, 1855)	M	adult	species	preserved specimen	AP	2019	Žan Kuralt
BMKR01550	KROK46	Araneae	Inermocoelotes inermis (L. Koch, 1855)	M	adult	species	preserved specimen	AP	2019	Žan Kuralt
BMKR01551	KROK46	Araneae	Inermocoelotes inermis (L. Koch, 1855)	F	adult	species	preserved specimen	AP	2019	Žan Kuralt
BMKR01552	KROK46	Araneae	Microneta viaria (Blackwall, 1841)	F	adult	species	preserved specimen	AP	2019	Žan Kuralt
BMKR01553	KROK46	Araneae	Microneta viaria (Blackwall, 1841)	F	adult	species	preserved specimen	AP	2019	Žan Kuralt
BMKR01554	KROK46	Araneae	Microneta viaria (Blackwall, 1841)	F	adult	species	preserved specimen	AP	2019	Žan Kuralt
BMKR01555	KROK46	Araneae	Microneta viaria (Blackwall, 1841)	F	adult	species	preserved specimen	AP	2019	Žan Kuralt
BMKR01556	KROK46	Araneae	Microneta viaria (Blackwall, 1841)	F	adult	species	preserved specimen	AP	2019	Žan Kuralt
BMKR01557	KROK46	Araneae	Microneta viaria (Blackwall, 1841)	F	adult	species	preserved specimen	AP	2019	Žan Kuralt
BMKR01558	KROK46	Araneae	Microneta viaria (Blackwall, 1841)	M	adult	species	preserved specimen	AP	2019	Žan Kuralt
BMKR01559	KROK46	Araneae	Microneta viaria (Blackwall, 1841)	M	adult	species	preserved specimen	AP	2019	Žan Kuralt
BMKR01560	KROK46	Araneae	Microneta viaria (Blackwall, 1841)	M	adult	species	preserved specimen	AP	2019	Žan Kuralt
BMKR01561	KROK46	Araneae	Microneta viaria (Blackwall, 1841)	M	adult	species	preserved specimen	AP	2019	Žan Kuralt
BMKR01562	KROK46	Araneae	Microneta viaria (Blackwall, 1841)	M	adult	species	preserved specimen	AP	2019	Žan Kuralt
BMKR01563	KROK46	Araneae	Microneta viaria (Blackwall, 1841)	M	adult	species	preserved specimen	AP	2019	Žan Kuralt
BMKR01564	KROK46	Araneae	Microneta viaria (Blackwall, 1841)	M	adult	species	preserved specimen	AP	2019	Žan Kuralt
BMKR01565	KROK46	Araneae	Microneta viaria (Blackwall, 1841)	M	adult	species	preserved specimen	AP	2019	Žan Kuralt
BMKR01566	KROK46	Araneae	Microneta viaria (Blackwall, 1841)	M	adult	species	preserved specimen	AP	2019	Žan Kuralt
BMKR01567	KROK46	Araneae	Pardosa alacris C.L. Koch, 1833	M	adult	species	preserved specimen	AP	2019	Žan Kuralt
BMKR01568	KROK46	Araneae	Pardosa alacris C.L. Koch, 1833	M	adult	species	preserved specimen	AP	2019	Žan Kuralt
BMKR01569	KROK46	Araneae	Pardosa alacris C.L. Koch, 1833	M	adult	species	preserved specimen	AP	2019	Žan Kuralt
BMKR01570	KROK46	Araneae	Pardosa alacris C.L. Koch, 1833	M	adult	species	preserved specimen	AP	2019	Žan Kuralt
BMKR01571	KROK46	Araneae	Pardosa alacris C.L. Koch, 1833	M	adult	species	preserved specimen	AP	2019	Žan Kuralt
BMKR01572	KROK46	Araneae	Pardosa alacris C.L. Koch, 1833	M	adult	species	preserved specimen	AP	2019	Žan Kuralt
BMKR01573	KROK46	Araneae	Pardosa alacris C.L. Koch, 1833	M	adult	species	preserved specimen	AP	2019	Žan Kuralt
BMKR01574	KROK46	Araneae	Pardosa alacris C.L. Koch, 1833	M	adult	species	preserved specimen	AP	2019	Žan Kuralt
BMKR01575	KROK46	Araneae	Pardosa alacris C.L. Koch, 1833	M	adult	species	preserved specimen	AP	2019	Žan Kuralt
BMKR01576	KROK46	Araneae	Pardosa alacris C.L. Koch, 1833	M	adult	species	preserved specimen	AP	2019	Žan Kuralt
BMKR01577	KROK46	Araneae	Pardosa alacris C.L. Koch, 1833	M	adult	species	preserved specimen	AP	2019	Žan Kuralt
BMKR01578	KROK46	Araneae	Pardosa alacris C.L. Koch, 1833	M	adult	species	preserved specimen	AP	2019	Žan Kuralt
BMKR01579	KROK46	Araneae	Pardosa alacris C.L. Koch, 1833	M	adult	species	preserved specimen	AP	2019	Žan Kuralt
BMKR01580	KROK46	Araneae	Pardosa alacris C.L. Koch, 1833	M	adult	species	preserved specimen	AP	2019	Žan Kuralt
BMKR01581	KROK46	Araneae	Pardosa alacris C.L. Koch, 1833	F	adult	species	preserved specimen	AP	2019	Žan Kuralt
BMKR01582	KROK46	Araneae	Pardosa alacris C.L. Koch, 1833	F	adult	species	preserved specimen	AP	2019	Žan Kuralt
BMKR01583	KROK48	Araneae	Dysdera adriatica Kulczynski, 1897	M	adult	species	preserved specimen	AP	2019	Žan Kuralt	KROK138-20	OL874949
BMKR01584	KROK56	Araneae	Dysdera adriatica Kulczynski, 1897	M	adult	species	preserved specimen	AP	2019	Žan Kuralt	KROK139-20	OL874947
BMKR01585	KROK46	Araneae	Tenuiphantes tenebricola (Wider, 1834)	M	adult	species	preserved specimen	AP	2019	Žan Kuralt
BMKR01586	KROK46	Araneae	Tenuiphantes tenebricola (Wider, 1834)	M	adult	species	preserved specimen	AP	2019	Žan Kuralt
BMKR01587	KROK46	Araneae	Tenuiphantes tenebricola (Wider, 1834)	F	adult	species	preserved specimen	AP	2019	Žan Kuralt
BMKR01588	KROK48	Coleoptera	Pterostichus burmeisteri Heer, 1837	M	adult	species	preserved specimen	AP	2019	Urška Ratajc
BMKR01589	KROK48	Coleoptera	Pterostichus burmeisteri Heer, 1837	M	adult	species	preserved specimen	AP	2019	Urška Ratajc
BMKR01590	KROK45	Araneae	Dysdera adriatica Kulczynski, 1897	M	adult	species	preserved specimen	AP	2019	Žan Kuralt	KROK064-19	MT994096
BMKR01591	KROK49	Coleoptera	Carabus irregularis Fabricius, 1792	M	adult	species	preserved specimen	AP	2019	Urška Ratajc	KROK020-19	MT994076
BMKR01592	KROK49	Coleoptera	Nebria dahlii Sturm, 1815	F	adult	species	preserved specimen	AP	2019	Urška Ratajc	KROK021-19	MT994129
BMKR01593	KROK49	Coleoptera	Cychrus attenuatus (Fabricius, 1792)	F	adult	species	preserved specimen	AP	2019	Urška Ratajc
BMKR01594	KROK49	Coleoptera	Molops elatus (Fabricius, 1801)	F	adult	species	preserved specimen	AP	2019	Urška Ratajc
BMKR01595	KROK46	Geophilomorpha	Strigamia acuminata (Leach, 1814)	M	adult	species	preserved specimen	AP	2019	Ivan Kos
BMKR01596	KROK46	Geophilomorpha	Strigamia acuminata (Leach, 1814)	M	adult	species	preserved specimen	AP	2019	Ivan Kos
BMKR01597	KROK45	Araneae	Dysdera adriatica Kulczynski, 1897	M	adult	species	preserved specimen	AP	2019	Žan Kuralt	KROK140-20	OL874948
BMKR01598	KROK60	Araneae	Dasumia canestrinii (L. Koch, 1876)	F	adult	species	preserved specimen	AP	2019	Žan Kuralt	KROK141-20	OL874946
BMKR01599	KROK60	Araneae	Dysdera adriatica Kulczynski, 1897	F	adult	species	preserved specimen	AP	2019	Žan Kuralt
BMKR01600	KROK49	Coleoptera	Molops piceus (Panzer, 1793)	M	adult	species	preserved specimen	AP	2019	Urška Ratajc
BMKR01601	KROK49	Coleoptera	Molops piceus (Panzer, 1793)	F	adult	species	preserved specimen	AP	2019	Urška Ratajc
BMKR01602	KROK46	Scolopendromorpha	Cryptops parisi Brölemann, 1920			species	preserved specimen	MP	2019	Ivan Kos
BMKR01603	KROK47	Araneae	Amaurobius obustus L. Koch, 1868	M	adult	species	preserved specimen	AP	2019	Žan Kuralt
BMKR01604	KROK60	Araneae	Dysdera adriatica Kulczynski, 1897	F	adult	species	preserved specimen	AP	2019	Žan Kuralt
BMKR01605	KROK47	Araneae	Harpactea lepida (C. L. Koch, 1838)	M	adult	species	preserved specimen	AP	2019	Žan Kuralt
BMKR01606	KROK47	Araneae	Harpactea lepida (C. L. Koch, 1838)	M	adult	species	preserved specimen	AP	2019	Žan Kuralt
BMKR01607	KROK47	Araneae	Harpactea lepida (C. L. Koch, 1838)	M	adult	species	preserved specimen	AP	2019	Žan Kuralt
BMKR01608	KROK47	Araneae	Harpactea lepida (C. L. Koch, 1838)	M	adult	species	preserved specimen	AP	2019	Žan Kuralt
BMKR01609	KROK47	Araneae	Harpactea lepida (C. L. Koch, 1838)	F	adult	species	preserved specimen	AP	2019	Žan Kuralt
BMKR01610	KROK47	Araneae	Histopona luxurians (Kulczynski, 1897)	M	adult	species	preserved specimen	AP	2019	Žan Kuralt
BMKR01611	KROK47	Araneae	Histopona luxurians (Kulczynski, 1897)	M	adult	species	preserved specimen	AP	2019	Žan Kuralt
BMKR01612	KROK47	Araneae	Histopona luxurians (Kulczynski, 1897)	M	adult	species	preserved specimen	AP	2019	Žan Kuralt
BMKR01613	KROK47	Araneae	Histopona luxurians (Kulczynski, 1897)	M	adult	species	preserved specimen	AP	2019	Žan Kuralt
BMKR01614	KROK47	Araneae	Histopona luxurians (Kulczynski, 1897)	F	adult	species	preserved specimen	AP	2019	Žan Kuralt
BMKR01615	KROK47	Araneae	Histopona luxurians (Kulczynski, 1897)	F	adult	species	preserved specimen	AP	2019	Žan Kuralt
BMKR01616	KROK09	Araneae	Dysdera ninnii Canestrini, 1868	M	adult	species	preserved specimen	AP	2019	Žan Kuralt	KROK065-19	MT994097
BMKR01617	KROK67	Araneae	Neon reticulatus (Blackwall, 1853)	M	adult	species	preserved specimen	AP	2019	Žan Kuralt
BMKR01618	KROK47	Araneae	Inermocoelotes inermis (L. Koch, 1855)	M	adult	species	preserved specimen	AP	2019	Žan Kuralt
BMKR01619	KROK47	Araneae	Inermocoelotes inermis (L. Koch, 1855)	M	adult	species	preserved specimen	AP	2019	Žan Kuralt
BMKR01620	KROK47	Araneae	Inermocoelotes inermis (L. Koch, 1855)	M	adult	species	preserved specimen	AP	2019	Žan Kuralt
BMKR01621	KROK47	Araneae	Microneta viaria (Blackwall, 1841)	M	adult	species	preserved specimen	AP	2019	Žan Kuralt
BMKR01622	KROK47	Araneae	Microneta viaria (Blackwall, 1841)	M	adult	species	preserved specimen	AP	2019	Žan Kuralt
BMKR01623	KROK47	Araneae	Microneta viaria (Blackwall, 1841)	M	adult	species	preserved specimen	AP	2019	Žan Kuralt
BMKR01624	KROK47	Araneae	Microneta viaria (Blackwall, 1841)	M	adult	species	preserved specimen	AP	2019	Žan Kuralt
BMKR01625	KROK47	Araneae	Microneta viaria (Blackwall, 1841)	M	adult	species	preserved specimen	AP	2019	Žan Kuralt
BMKR01626	KROK47	Araneae	Microneta viaria (Blackwall, 1841)	M	adult	species	preserved specimen	AP	2019	Žan Kuralt
BMKR01627	KROK47	Araneae	Microneta viaria (Blackwall, 1841)	M	adult	species	preserved specimen	AP	2019	Žan Kuralt
BMKR01628	KROK47	Araneae	Microneta viaria (Blackwall, 1841)	M	adult	species	preserved specimen	AP	2019	Žan Kuralt
BMKR01629	KROK47	Araneae	Microneta viaria (Blackwall, 1841)	M	adult	species	preserved specimen	AP	2019	Žan Kuralt
BMKR01630	KROK47	Araneae	Microneta viaria (Blackwall, 1841)	M	adult	species	preserved specimen	AP	2019	Žan Kuralt
BMKR01631	KROK54	Araneae	Dysdera ninnii Canestrini, 1868	M	adult	species	preserved specimen	AP	2019	Žan Kuralt	KROK066-19	MT994095
BMKR01632	KROK53	Araneae	Harpactea lepida (C. L. Koch, 1838)	F	adult	species	preserved specimen	AP	2019	Žan Kuralt
BMKR01633	KROK47	Araneae	Pardosa alacris C.L. Koch, 1833	M	adult	species	preserved specimen	AP	2019	Žan Kuralt
BMKR01634	KROK47	Araneae	Pardosa alacris C.L. Koch, 1833	M	adult	species	preserved specimen	AP	2019	Žan Kuralt
BMKR01635	KROK47	Araneae	Pardosa alacris C.L. Koch, 1833	M	adult	species	preserved specimen	AP	2019	Žan Kuralt
BMKR01636	KROK54	Araneae	Harpactea lepida (C. L. Koch, 1838)	M	adult	species	preserved specimen	AP	2019	Žan Kuralt
BMKR01637	KROK47	Araneae	Tenuiphantes tenebricola (Wider, 1834)	F	adult	species	preserved specimen	AP	2019	Žan Kuralt
BMKR01638	KROK47	Araneae	Tenuiphantes tenebricola (Wider, 1834)	M	adult	species	preserved specimen	AP	2019	Žan Kuralt
BMKR01639	KROK47	Araneae	Tenuiphantes tenebricola (Wider, 1834)	M	adult	species	preserved specimen	AP	2019	Žan Kuralt
BMKR01640	KROK47	Araneae	Tenuiphantes tenebricola (Wider, 1834)	F	adult	species	preserved specimen	AP	2019	Žan Kuralt
BMKR01641	KROK58	Araneae	Harpactea lepida (C. L. Koch, 1838)	M	adult	species	preserved specimen	AP	2019	Žan Kuralt
BMKR01642	KROK47	Geophilomorpha	Strigamia transsilvanica Verhoeff, 1928	M	adult	species	preserved specimen	AP	2019	Ivan Kos
BMKR01643	KROK47	Lithobiomorpha	Eupolybothrus tridentinus (Fanzago, 1874)	F	adult	species	preserved specimen	AP	2019	Ivan Kos
BMKR01644	KROK47	Lithobiomorpha	Eupolybothrus tridentinus (Fanzago, 1874)	F	adult	species	preserved specimen	AP	2019	Ivan Kos
BMKR01645	KROK47	Lithobiomorpha	Lithobius castaneus Newport, 1844	F	adult	species	preserved specimen	AP	2019	Ivan Kos
BMKR01646	KROK47	Lithobiomorpha	Lithobius tenebrosus Meinert, 1872	F	adult	species	preserved specimen	AP	2019	Ivan Kos
BMKR01647	KROK48	Araneae	Amaurobius obustus L. Koch, 1868	M	adult	species	preserved specimen	AP	2019	Žan Kuralt
BMKR01648	KROK48	Araneae	Amaurobius obustus L. Koch, 1868	M	adult	species	preserved specimen	AP	2019	Žan Kuralt
BMKR01649	KROK58	Araneae	Harpactea lepida (C. L. Koch, 1838)	F	adult	species	preserved specimen	AP	2019	Žan Kuralt
BMKR01650	KROK59	Araneae	Harpactea lepida (C. L. Koch, 1838)	F	adult	species	preserved specimen	AP	2019	Žan Kuralt
BMKR01651	KROK51	Araneae	Harpactea lepida (C. L. Koch, 1838)	M	adult	species	preserved specimen	AP	2019	Žan Kuralt
BMKR01652	KROK48	Araneae	Harpactea lepida (C. L. Koch, 1838)	M	adult	species	preserved specimen	AP	2019	Žan Kuralt
BMKR01653	KROK48	Araneae	Harpactea lepida (C. L. Koch, 1838)	M	adult	species	preserved specimen	AP	2019	Žan Kuralt
BMKR01654	KROK48	Araneae	Harpactea lepida (C. L. Koch, 1838)	F	adult	species	preserved specimen	AP	2019	Žan Kuralt
BMKR01655	KROK48	Araneae	Harpactea lepida (C. L. Koch, 1838)	F	adult	species	preserved specimen	AP	2019	Žan Kuralt
BMKR01656	KROK48	Araneae	Inermocoelotes inermis (L. Koch, 1855)	M	adult	species	preserved specimen	AP	2019	Žan Kuralt
BMKR01657	KROK48	Araneae	Inermocoelotes inermis (L. Koch, 1855)	M	adult	species	preserved specimen	AP	2019	Žan Kuralt
BMKR01658	KROK48	Araneae	Inermocoelotes inermis (L. Koch, 1855)	M	adult	species	preserved specimen	AP	2019	Žan Kuralt
BMKR01659	KROK48	Araneae	Inermocoelotes inermis (L. Koch, 1855)	M	adult	species	preserved specimen	AP	2019	Žan Kuralt
BMKR01660	KROK48	Araneae	Inermocoelotes inermis (L. Koch, 1855)	M	adult	species	preserved specimen	AP	2019	Žan Kuralt
BMKR01661	KROK48	Araneae	Inermocoelotes inermis (L. Koch, 1855)	M	adult	species	preserved specimen	AP	2019	Žan Kuralt
BMKR01662	KROK48	Araneae	Inermocoelotes inermis (L. Koch, 1855)	M	adult	species	preserved specimen	AP	2019	Žan Kuralt
BMKR01663	KROK48	Araneae	Microneta viaria (Blackwall, 1841)	M	adult	species	preserved specimen	AP	2019	Žan Kuralt
BMKR01664	KROK48	Araneae	Microneta viaria (Blackwall, 1841)	M	adult	species	preserved specimen	AP	2019	Žan Kuralt
BMKR01665	KROK48	Araneae	Microneta viaria (Blackwall, 1841)	M	adult	species	preserved specimen	AP	2019	Žan Kuralt
BMKR01666	KROK48	Araneae	Microneta viaria (Blackwall, 1841)	M	adult	species	preserved specimen	AP	2019	Žan Kuralt
BMKR01667	KROK48	Araneae	Microneta viaria (Blackwall, 1841)	M	adult	species	preserved specimen	AP	2019	Žan Kuralt
BMKR01668	KROK48	Araneae	Microneta viaria (Blackwall, 1841)	M	adult	species	preserved specimen	AP	2019	Žan Kuralt
BMKR01669	KROK48	Araneae	Microneta viaria (Blackwall, 1841)	M	adult	species	preserved specimen	AP	2019	Žan Kuralt
BMKR01670	KROK48	Araneae	Microneta viaria (Blackwall, 1841)	M	adult	species	preserved specimen	AP	2019	Žan Kuralt
BMKR01671	KROK48	Araneae	Microneta viaria (Blackwall, 1841)	M	adult	species	preserved specimen	AP	2019	Žan Kuralt
BMKR01672	KROK34	Araneae	Harpactea lepida (C. L. Koch, 1838)	M	adult	species	preserved specimen	AP	2019	Žan Kuralt
BMKR01673	KROK55	Araneae	Haplodrassus silvestris (Blackwall, 1833)	M	adult	species	preserved specimen	AP	2019	Žan Kuralt	KROK067-19	MT994104
BMKR01674	KROK48	Araneae	Pardosa alacris C.L. Koch, 1833	M	adult	species	preserved specimen	AP	2019	Žan Kuralt
BMKR01675	KROK48	Araneae	Hahnia pusilla C. L. Koch, 1841	M	adult	species	preserved specimen	AP	2019	Žan Kuralt	KROK068-19	MT994103
BMKR01676	KROK17	Araneae	Centromerus cavernarum (L.Koch, 1872)	M	adult	species	preserved specimen	AP	2019	Žan Kuralt
BMKR01677	KROK48	Araneae	Tenuiphantes tenebricola (Wider, 1834)	F	adult	species	preserved specimen	AP	2019	Žan Kuralt
BMKR01678	KROK48	Araneae	Tenuiphantes tenebricola (Wider, 1834)	F	adult	species	preserved specimen	AP	2019	Žan Kuralt
BMKR01679	KROK48	Araneae	Tenuiphantes tenebricola (Wider, 1834)	F	adult	species	preserved specimen	AP	2019	Žan Kuralt
BMKR01680	KROK48	Araneae	Tenuiphantes tenebricola (Wider, 1834)	F	adult	species	preserved specimen	AP	2019	Žan Kuralt
BMKR01681	KROK18	Araneae	Centromerus cavernarum (L.Koch, 1872)	F	adult	species	preserved specimen	AP	2019	Žan Kuralt
BMKR01682	KROK18	Araneae	Centromerus cavernarum (L.Koch, 1872)	F	adult	species	preserved specimen	AP	2019	Žan Kuralt	KROK069-19	MT994077
BMKR01683	KROK49	Coleoptera	Pterostichus burmeisteri Heer, 1837	M	adult	species	preserved specimen	AP	2019	Urška Ratajc
BMKR01684	KROK48	Geophilomorpha	Strigamia transsilvanica Verhoeff, 1928	M	adult	species	preserved specimen	AP	2019	Ivan Kos
BMKR01685	KROK48	Lithobiomorpha	Lithobius pelidnus Haase, 1880	F	adult	species	preserved specimen	AP	2019	Ivan Kos
BMKR01686	KROK48	Lithobiomorpha	Lithobius pelidnus Haase, 1880	F	adult	species	preserved specimen	AP	2019	Ivan Kos
BMKR01687	KROK48	Lithobiomorpha	Lithobius pelidnus Haase, 1880	F	adult	species	preserved specimen	AP	2019	Ivan Kos
BMKR01688	KROK49	Coleoptera	Pterostichus burmeisteri Heer, 1837	M	adult	species	preserved specimen	AP	2019	Urška Ratajc
BMKR01689	KROK49	Coleoptera	Pterostichus burmeisteri Heer, 1837	F	adult	species	preserved specimen	AP	2019	Urška Ratajc
BMKR01690	KROK49	Coleoptera	Pterostichus burmeisteri Heer, 1837	F	adult	species	preserved specimen	AP	2019	Urška Ratajc
BMKR01691	KROK49	Araneae	Amaurobius fenestralis (Ström, 1768)	M	adult	species	preserved specimen	AP	2019	Žan Kuralt
BMKR01692	KROK49	Araneae	Amaurobius fenestralis (Ström, 1768)	M	adult	species	preserved specimen	AP	2019	Žan Kuralt
BMKR01693	KROK49	Araneae	Amaurobius obustus L. Koch, 1868	F	adult	species	preserved specimen	AP	2019	Žan Kuralt
BMKR01694	KROK49	Araneae	Harpactea lepida (C. L. Koch, 1838)	M	adult	species	preserved specimen	AP	2019	Žan Kuralt
BMKR01695	KROK49	Araneae	Harpactea lepida (C. L. Koch, 1838)	M	adult	species	preserved specimen	AP	2019	Žan Kuralt
BMKR01696	KROK49	Araneae	Harpactea lepida (C. L. Koch, 1838)	M	adult	species	preserved specimen	AP	2019	Žan Kuralt
BMKR01697	KROK49	Araneae	Harpactea lepida (C. L. Koch, 1838)	M	adult	species	preserved specimen	AP	2019	Žan Kuralt
BMKR01698	KROK49	Araneae	Harpactea lepida (C. L. Koch, 1838)	M	adult	species	preserved specimen	AP	2019	Žan Kuralt
BMKR01699	KROK49	Araneae	Harpactea lepida (C. L. Koch, 1838)	M	adult	species	preserved specimen	AP	2019	Žan Kuralt
BMKR01700	KROK49	Araneae	Harpactea lepida (C. L. Koch, 1838)	M	adult	species	preserved specimen	AP	2019	Žan Kuralt
BMKR01701	KROK49	Araneae	Harpactea lepida (C. L. Koch, 1838)	M	adult	species	preserved specimen	AP	2019	Žan Kuralt
BMKR01702	KROK49	Araneae	Harpactea lepida (C. L. Koch, 1838)	M	adult	species	preserved specimen	AP	2019	Žan Kuralt
BMKR01703	KROK49	Araneae	Harpactea lepida (C. L. Koch, 1838)	M	adult	species	preserved specimen	AP	2019	Žan Kuralt
BMKR01704	KROK49	Araneae	Harpactea lepida (C. L. Koch, 1838)	M	adult	species	preserved specimen	AP	2019	Žan Kuralt
BMKR01705	KROK49	Araneae	Histopona luxurians (Kulczynski, 1897)	M	adult	species	preserved specimen	AP	2019	Žan Kuralt
BMKR01706	KROK49	Araneae	Histopona luxurians (Kulczynski, 1897)	M	adult	species	preserved specimen	AP	2019	Žan Kuralt
BMKR01707	KROK49	Araneae	Histopona luxurians (Kulczynski, 1897)	M	adult	species	preserved specimen	AP	2019	Žan Kuralt
BMKR01708	KROK49	Araneae	Histopona luxurians (Kulczynski, 1897)	M	adult	species	preserved specimen	AP	2019	Žan Kuralt
BMKR01709	KROK49	Araneae	Histopona luxurians (Kulczynski, 1897)	M	adult	species	preserved specimen	AP	2019	Žan Kuralt
BMKR01710	KROK49	Araneae	Histopona luxurians (Kulczynski, 1897)	M	adult	species	preserved specimen	AP	2019	Žan Kuralt
BMKR01711	KROK49	Araneae	Inermocoelotes inermis (L. Koch, 1855)	M	adult	species	preserved specimen	AP	2019	Žan Kuralt
BMKR01712	KROK49	Araneae	Inermocoelotes inermis (L. Koch, 1855)	M	adult	species	preserved specimen	AP	2019	Žan Kuralt
BMKR01713	KROK49	Araneae	Inermocoelotes inermis (L. Koch, 1855)	M	adult	species	preserved specimen	AP	2019	Žan Kuralt
BMKR01714	KROK49	Araneae	Inermocoelotes inermis (L. Koch, 1855)	M	adult	species	preserved specimen	AP	2019	Žan Kuralt
BMKR01715	KROK49	Araneae	Inermocoelotes inermis (L. Koch, 1855)	M	adult	species	preserved specimen	AP	2019	Žan Kuralt
BMKR01716	KROK49	Araneae	Microneta viaria (Blackwall, 1841)	M	adult	species	preserved specimen	AP	2019	Žan Kuralt
BMKR01717	KROK47	Araneae	Centromerus cavernarum (L.Koch, 1872)	F	adult	species	preserved specimen	AP	2019	Žan Kuralt
BMKR01718	KROK49	Coleoptera	Pterostichus oblongopunctatus Fabricius, 1787	M	adult	species	preserved specimen	AP	2019	Urška Ratajc
BMKR01719	KROK56	Coleoptera	Abax ovalis (Duftschmid, 1812)	M	adult	species	preserved specimen	AP	2019	Urška Ratajc
BMKR01720	KROK29	Araneae	Centromerus silvicola (Kulczynski, 1887)	F	adult	species	preserved specimen	AP	2019	Žan Kuralt
BMKR01721	KROK56	Coleoptera	Abax parallelepipedus (Piller and Mitterpacher, 1783)	F	adult	species	preserved specimen	AP	2019	Urška Ratajc
BMKR01722	KROK56	Coleoptera	Molops piceus (Panzer, 1793)	M	adult	species	preserved specimen	AP	2019	Urška Ratajc
BMKR01723	KROK56	Coleoptera	Molops striolatus (Fabricius, 1801)	M	adult	species	preserved specimen	AP	2019	Urška Ratajc
BMKR01724	KROK56	Coleoptera	Pterostichus burmeisteri Heer, 1837	M	adult	species	preserved specimen	AP	2019	Urška Ratajc
BMKR01725	KROK56	Coleoptera	Pterostichus burmeisteri Heer, 1837	M	adult	species	preserved specimen	AP	2019	Urška Ratajc
BMKR01726	KROK56	Coleoptera	Pterostichus burmeisteri Heer, 1837	F	adult	species	preserved specimen	AP	2019	Urška Ratajc
BMKR01727	KROK49	Lithobiomorpha	Lithobius dentatus C.L.Koch, 1844	F	adult	species	preserved specimen	AP	2019	Ivan Kos
BMKR01728	KROK49	Lithobiomorpha	Lithobius tenebrosus Meinert, 1872	F	adult	species	preserved specimen	AP	2019	Ivan Kos
BMKR01729	KROK57	Coleoptera	Abax ovalis (Duftschmid, 1812)	M	adult	species	preserved specimen	AP	2019	Urška Ratajc
BMKR01730	KROK50	Araneae	Harpactea lepida (C. L. Koch, 1838)	M	adult	species	preserved specimen	AP	2019	Žan Kuralt
BMKR01731	KROK50	Araneae	Harpactea lepida (C. L. Koch, 1838)	M	adult	species	preserved specimen	AP	2019	Žan Kuralt
BMKR01732	KROK50	Araneae	Harpactea lepida (C. L. Koch, 1838)	M	adult	species	preserved specimen	AP	2019	Žan Kuralt
BMKR01733	KROK50	Araneae	Harpactea lepida (C. L. Koch, 1838)	M	adult	species	preserved specimen	AP	2019	Žan Kuralt
BMKR01734	KROK50	Araneae	Histopona luxurians (Kulczynski, 1897)	M	adult	species	preserved specimen	AP	2019	Žan Kuralt
BMKR01735	KROK50	Araneae	Histopona luxurians (Kulczynski, 1897)	M	adult	species	preserved specimen	AP	2019	Žan Kuralt
BMKR01736	KROK50	Araneae	Histopona luxurians (Kulczynski, 1897)	M	adult	species	preserved specimen	AP	2019	Žan Kuralt
BMKR01737	KROK50	Araneae	Inermocoelotes inermis (L. Koch, 1855)	M	adult	species	preserved specimen	AP	2019	Žan Kuralt
BMKR01738	KROK50	Araneae	Inermocoelotes inermis (L. Koch, 1855)	M	adult	species	preserved specimen	AP	2019	Žan Kuralt
BMKR01739	KROK50	Araneae	Inermocoelotes inermis (L. Koch, 1855)	M	adult	species	preserved specimen	AP	2019	Žan Kuralt
BMKR01740	KROK50	Araneae	Inermocoelotes inermis (L. Koch, 1855)	M	adult	species	preserved specimen	AP	2019	Žan Kuralt
BMKR01741	KROK50	Araneae	Inermocoelotes inermis (L. Koch, 1855)	M	adult	species	preserved specimen	AP	2019	Žan Kuralt
BMKR01742	KROK50	Araneae	Inermocoelotes inermis (L. Koch, 1855)	M	adult	species	preserved specimen	AP	2019	Žan Kuralt
BMKR01743	KROK50	Araneae	Inermocoelotes inermis (L. Koch, 1855)	M	adult	species	preserved specimen	AP	2019	Žan Kuralt
BMKR01744	KROK50	Araneae	Inermocoelotes inermis (L. Koch, 1855)	M	adult	species	preserved specimen	AP	2019	Žan Kuralt
BMKR01745	KROK50	Araneae	Inermocoelotes inermis (L. Koch, 1855)	M	adult	species	preserved specimen	AP	2019	Žan Kuralt
BMKR01746	KROK50	Araneae	Inermocoelotes inermis (L. Koch, 1855)	M	adult	species	preserved specimen	AP	2019	Žan Kuralt
BMKR01747	KROK50	Araneae	Inermocoelotes inermis (L. Koch, 1855)	M	adult	species	preserved specimen	AP	2019	Žan Kuralt
BMKR01748	KROK50	Araneae	Inermocoelotes inermis (L. Koch, 1855)	M	adult	species	preserved specimen	AP	2019	Žan Kuralt
BMKR01749	KROK50	Araneae	Inermocoelotes inermis (L. Koch, 1855)	M	adult	species	preserved specimen	AP	2019	Žan Kuralt
BMKR01750	KROK29	Araneae	Centromerus silvicola (Kulczynski, 1887)	F	adult	species	preserved specimen	AP	2019	Žan Kuralt
BMKR01751	KROK50	Araneae	Microneta viaria (Blackwall, 1841)	M	adult	species	preserved specimen	AP	2019	Žan Kuralt
BMKR01752	KROK30	Araneae	Centromerus silvicola (Kulczynski, 1887)	F	adult	species	preserved specimen	AP	2019	Žan Kuralt
BMKR01753	KROK50	Araneae	Tenuiphantes tenebricola (Wider, 1834)	M	adult	species	preserved specimen	AP	2019	Žan Kuralt
BMKR01754	KROK50	Araneae	Tenuiphantes tenebricola (Wider, 1834)	F	adult	species	preserved specimen	AP	2019	Žan Kuralt
BMKR01755	KROK50	Araneae	Tenuiphantes tenebricola (Wider, 1834)	F	adult	species	preserved specimen	AP	2019	Žan Kuralt
BMKR01756	KROK50	Araneae	Tenuiphantes tenebricola (Wider, 1834)	F	adult	species	preserved specimen	AP	2019	Žan Kuralt
BMKR01757	KROK36	Araneae	Centromerus sylvaticus (Blackwall, 1841)	F	adult	species	preserved specimen	AP	2019	Žan Kuralt
BMKR01758	KROK17	Araneae	Centromerus cavernarum (L.Koch, 1872)	M	adult	species	preserved specimen	AP	2019	Žan Kuralt	KROK143-20	OL874925
BMKR01759	KROK51	Araneae	Harpactea lepida (C. L. Koch, 1838)	M	adult	species	preserved specimen	AP	2019	Žan Kuralt
BMKR01760	KROK51	Araneae	Harpactea lepida (C. L. Koch, 1838)	M	adult	species	preserved specimen	AP	2019	Žan Kuralt
BMKR01761	KROK51	Araneae	Harpactea lepida (C. L. Koch, 1838)	M	adult	species	preserved specimen	AP	2019	Žan Kuralt
BMKR01762	KROK51	Araneae	Harpactea lepida (C. L. Koch, 1838)	M	adult	species	preserved specimen	AP	2019	Žan Kuralt
BMKR01763	KROK51	Araneae	Harpactea lepida (C. L. Koch, 1838)	M	adult	species	preserved specimen	AP	2019	Žan Kuralt
BMKR01764	KROK51	Araneae	Harpactea lepida (C. L. Koch, 1838)	M	adult	species	preserved specimen	AP	2019	Žan Kuralt
BMKR01765	KROK51	Araneae	Harpactea lepida (C. L. Koch, 1838)	M	adult	species	preserved specimen	AP	2019	Žan Kuralt
BMKR01766	KROK21	Araneae	Ceratinella brevis (Wider, 1834)	M	adult	species	preserved specimen	AP	2019	Žan Kuralt
BMKR01767	KROK51	Araneae	Histopona luxurians (Kulczynski, 1897)	M	adult	species	preserved specimen	AP	2019	Žan Kuralt
BMKR01768	KROK51	Araneae	Histopona luxurians (Kulczynski, 1897)	M	adult	species	preserved specimen	AP	2019	Žan Kuralt
BMKR01769	KROK51	Araneae	Histopona luxurians (Kulczynski, 1897)	M	adult	species	preserved specimen	AP	2019	Žan Kuralt
BMKR01770	KROK51	Araneae	Inermocoelotes inermis (L. Koch, 1855)	M	adult	species	preserved specimen	AP	2019	Žan Kuralt
BMKR01771	KROK51	Araneae	Inermocoelotes inermis (L. Koch, 1855)	M	adult	species	preserved specimen	AP	2019	Žan Kuralt
BMKR01772	KROK51	Araneae	Inermocoelotes inermis (L. Koch, 1855)	M	adult	species	preserved specimen	AP	2019	Žan Kuralt
BMKR01773	KROK51	Araneae	Inermocoelotes inermis (L. Koch, 1855)	M	adult	species	preserved specimen	AP	2019	Žan Kuralt
BMKR01774	KROK51	Araneae	Inermocoelotes inermis (L. Koch, 1855)	M	adult	species	preserved specimen	AP	2019	Žan Kuralt
BMKR01775	KROK51	Araneae	Microneta viaria (Blackwall, 1841)	M	adult	species	preserved specimen	AP	2019	Žan Kuralt
BMKR01776	KROK52	Araneae	Harpactea lepida (C. L. Koch, 1838)	M	adult	species	preserved specimen	AP	2019	Žan Kuralt
BMKR01777	KROK52	Araneae	Harpactea lepida (C. L. Koch, 1838)	M	adult	species	preserved specimen	AP	2019	Žan Kuralt
BMKR01778	KROK52	Araneae	Harpactea lepida (C. L. Koch, 1838)	M	adult	species	preserved specimen	AP	2019	Žan Kuralt
BMKR01779	KROK52	Araneae	Harpactea lepida (C. L. Koch, 1838)	M	adult	species	preserved specimen	AP	2019	Žan Kuralt
BMKR01780	KROK52	Araneae	Harpactea lepida (C. L. Koch, 1838)	M	adult	species	preserved specimen	AP	2019	Žan Kuralt
BMKR01781	KROK52	Araneae	Harpactea lepida (C. L. Koch, 1838)	M	adult	species	preserved specimen	AP	2019	Žan Kuralt
BMKR01782	KROK52	Araneae	Harpactea lepida (C. L. Koch, 1838)	M	adult	species	preserved specimen	AP	2019	Žan Kuralt
BMKR01783	KROK52	Araneae	Harpactea lepida (C. L. Koch, 1838)	M	adult	species	preserved specimen	AP	2019	Žan Kuralt
BMKR01784	KROK52	Araneae	Harpactea lepida (C. L. Koch, 1838)	M	adult	species	preserved specimen	AP	2019	Žan Kuralt
BMKR01785	KROK52	Araneae	Harpactea lepida (C. L. Koch, 1838)	M	adult	species	preserved specimen	AP	2019	Žan Kuralt
BMKR01786	KROK52	Araneae	Harpactea lepida (C. L. Koch, 1838)	M	adult	species	preserved specimen	AP	2019	Žan Kuralt
BMKR01787	KROK52	Araneae	Harpactea lepida (C. L. Koch, 1838)	M	adult	species	preserved specimen	AP	2019	Žan Kuralt
BMKR01788	KROK52	Araneae	Harpactea lepida (C. L. Koch, 1838)	M	adult	species	preserved specimen	AP	2019	Žan Kuralt
BMKR01789	KROK52	Araneae	Harpactea lepida (C. L. Koch, 1838)	M	adult	species	preserved specimen	AP	2019	Žan Kuralt
BMKR01790	KROK52	Araneae	Harpactea lepida (C. L. Koch, 1838)	F	adult	species	preserved specimen	AP	2019	Žan Kuralt
BMKR01791	KROK52	Araneae	Histopona luxurians (Kulczynski, 1897)	M	adult	species	preserved specimen	AP	2019	Žan Kuralt
BMKR01792	KROK52	Araneae	Inermocoelotes inermis (L. Koch, 1855)	M	adult	species	preserved specimen	AP	2019	Žan Kuralt
BMKR01793	KROK52	Araneae	Inermocoelotes inermis (L. Koch, 1855)	M	adult	species	preserved specimen	AP	2019	Žan Kuralt
BMKR01794	KROK52	Araneae	Inermocoelotes inermis (L. Koch, 1855)	M	adult	species	preserved specimen	AP	2019	Žan Kuralt
BMKR01795	KROK52	Araneae	Inermocoelotes inermis (L. Koch, 1855)	M	adult	species	preserved specimen	AP	2019	Žan Kuralt
BMKR01796	KROK52	Araneae	Microneta viaria (Blackwall, 1841)	M	adult	species	preserved specimen	AP	2019	Žan Kuralt
BMKR01797	KROK52	Araneae	Microneta viaria (Blackwall, 1841)	M	adult	species	preserved specimen	AP	2019	Žan Kuralt
BMKR01798	KROK53	Araneae	Amaurobius obustus L. Koch, 1868	M	adult	species	preserved specimen	AP	2019	Žan Kuralt
BMKR01799	KROK53	Araneae	Amaurobius obustus L. Koch, 1868	M	adult	species	preserved specimen	AP	2019	Žan Kuralt
BMKR01800	KROK53	Araneae	Amaurobius obustus L. Koch, 1868	M	adult	species	preserved specimen	AP	2019	Žan Kuralt
BMKR01801	KROK53	Araneae	Harpactea lepida (C. L. Koch, 1838)	M	adult	species	preserved specimen	AP	2019	Žan Kuralt
BMKR01802	KROK53	Araneae	Harpactea lepida (C. L. Koch, 1838)	M	adult	species	preserved specimen	AP	2019	Žan Kuralt
BMKR01803	KROK53	Araneae	Harpactea lepida (C. L. Koch, 1838)	M	adult	species	preserved specimen	AP	2019	Žan Kuralt
BMKR01804	KROK53	Araneae	Harpactea lepida (C. L. Koch, 1838)	M	adult	species	preserved specimen	AP	2019	Žan Kuralt
BMKR01805	KROK53	Araneae	Harpactea lepida (C. L. Koch, 1838)	M	adult	species	preserved specimen	AP	2019	Žan Kuralt
BMKR01806	KROK53	Araneae	Harpactea lepida (C. L. Koch, 1838)	M	adult	species	preserved specimen	AP	2019	Žan Kuralt
BMKR01807	KROK53	Araneae	Harpactea lepida (C. L. Koch, 1838)	M	adult	species	preserved specimen	AP	2019	Žan Kuralt
BMKR01808	KROK53	Araneae	Harpactea lepida (C. L. Koch, 1838)	M	adult	species	preserved specimen	AP	2019	Žan Kuralt
BMKR01809	KROK53	Araneae	Harpactea lepida (C. L. Koch, 1838)	M	adult	species	preserved specimen	AP	2019	Žan Kuralt
BMKR01810	KROK53	Araneae	Harpactea lepida (C. L. Koch, 1838)	M	adult	species	preserved specimen	AP	2019	Žan Kuralt
BMKR01811	KROK38	Araneae	Ceratinella brevis (Wider, 1834)	M	adult	species	preserved specimen	AP	2019	Žan Kuralt	KROK144-20	OL874926
BMKR01812	KROK53	Araneae	Histopona luxurians (Kulczynski, 1897)	M	adult	species	preserved specimen	AP	2019	Žan Kuralt
BMKR01813	KROK53	Araneae	Histopona luxurians (Kulczynski, 1897)	M	adult	species	preserved specimen	AP	2019	Žan Kuralt
BMKR01814	KROK53	Araneae	Histopona luxurians (Kulczynski, 1897)	M	adult	species	preserved specimen	AP	2019	Žan Kuralt
BMKR01815	KROK53	Araneae	Histopona luxurians (Kulczynski, 1897)	M	adult	species	preserved specimen	AP	2019	Žan Kuralt
BMKR01816	KROK53	Araneae	Histopona luxurians (Kulczynski, 1897)	M	adult	species	preserved specimen	AP	2019	Žan Kuralt
BMKR01817	KROK53	Araneae	Histopona luxurians (Kulczynski, 1897)	M	adult	species	preserved specimen	AP	2019	Žan Kuralt
BMKR01818	KROK53	Araneae	Histopona luxurians (Kulczynski, 1897)	M	adult	species	preserved specimen	AP	2019	Žan Kuralt
BMKR01819	KROK53	Araneae	Histopona luxurians (Kulczynski, 1897)	M	adult	species	preserved specimen	AP	2019	Žan Kuralt
BMKR01820	KROK53	Araneae	Histopona luxurians (Kulczynski, 1897)	M	adult	species	preserved specimen	AP	2019	Žan Kuralt
BMKR01821	KROK53	Araneae	Histopona luxurians (Kulczynski, 1897)	M	adult	species	preserved specimen	AP	2019	Žan Kuralt
BMKR01822	KROK53	Araneae	Histopona luxurians (Kulczynski, 1897)	M	adult	species	preserved specimen	AP	2019	Žan Kuralt
BMKR01823	KROK53	Araneae	Histopona luxurians (Kulczynski, 1897)	F	adult	species	preserved specimen	AP	2019	Žan Kuralt
BMKR01824	KROK45	Araneae	Ceratinella brevis (Wider, 1834)	M	adult	species	preserved specimen	AP	2019	Žan Kuralt	KROK070-19	MT994078
BMKR01825	KROK53	Araneae	Inermocoelotes inermis (L. Koch, 1855)	M	adult	species	preserved specimen	AP	2019	Žan Kuralt
BMKR01826	KROK53	Araneae	Inermocoelotes inermis (L. Koch, 1855)	M	adult	species	preserved specimen	AP	2019	Žan Kuralt
BMKR01827	KROK53	Araneae	Inermocoelotes inermis (L. Koch, 1855)	M	adult	species	preserved specimen	AP	2019	Žan Kuralt
BMKR01828	KROK53	Araneae	Inermocoelotes inermis (L. Koch, 1855)	M	adult	species	preserved specimen	AP	2019	Žan Kuralt
BMKR01829	KROK53	Araneae	Inermocoelotes inermis (L. Koch, 1855)	M	adult	species	preserved specimen	AP	2019	Žan Kuralt
BMKR01830	KROK43	Araneae	Ceratinella scabrosa (O.Pickard-Cambridge, 1871)	M	adult	species	preserved specimen	AP	2019	Žan Kuralt
BMKR01831	KROK53	Araneae	Microneta viaria (Blackwall, 1841)	F	adult	species	preserved specimen	AP	2019	Žan Kuralt
BMKR01832	KROK53	Araneae	Microneta viaria (Blackwall, 1841)	F	adult	species	preserved specimen	AP	2019	Žan Kuralt
BMKR01833	KROK53	Araneae	Microneta viaria (Blackwall, 1841)	F	adult	species	preserved specimen	AP	2019	Žan Kuralt
BMKR01834	KROK53	Araneae	Microneta viaria (Blackwall, 1841)	M	adult	species	preserved specimen	AP	2019	Žan Kuralt
BMKR01835	KROK53	Araneae	Microneta viaria (Blackwall, 1841)	M	adult	species	preserved specimen	AP	2019	Žan Kuralt
BMKR01836	KROK53	Lithobiomorpha	Eupolybothrus tridentinus (Fanzago, 1874)	F	adult	species	preserved specimen	AP	2019	Ivan Kos
BMKR01837	KROK53	Lithobiomorpha	Lithobius dentatus C.L.Koch, 1844	F	adult	species	preserved specimen	AP	2019	Ivan Kos
BMKR01838	KROK53	Lithobiomorpha	Lithobius dentatus C.L.Koch, 1844	F	adult	species	preserved specimen	AP	2019	Ivan Kos
BMKR01839	KROK53	Lithobiomorpha	Lithobius dentatus C.L.Koch, 1844	F	adult	species	preserved specimen	AP	2019	Ivan Kos
BMKR01840	KROK54	Araneae	Amaurobius obustus L. Koch, 1868	M	adult	species	preserved specimen	AP	2019	Žan Kuralt
BMKR01841	KROK54	Araneae	Amaurobius obustus L. Koch, 1868	M	adult	species	preserved specimen	AP	2019	Žan Kuralt
BMKR01842	KROK54	Araneae	Amaurobius obustus L. Koch, 1868	M	adult	species	preserved specimen	AP	2019	Žan Kuralt
BMKR01843	KROK54	Araneae	Amaurobius obustus L. Koch, 1868	M	adult	species	preserved specimen	AP	2019	Žan Kuralt
BMKR01844	KROK54	Araneae	Amaurobius obustus L. Koch, 1868	M	adult	species	preserved specimen	AP	2019	Žan Kuralt
BMKR01845	KROK54	Araneae	Amaurobius obustus L. Koch, 1868	M	adult	species	preserved specimen	AP	2019	Žan Kuralt
BMKR01846	KROK54	Araneae	Amaurobius obustus L. Koch, 1868	M	adult	species	preserved specimen	AP	2019	Žan Kuralt
BMKR01847	KROK54	Araneae	Amaurobius obustus L. Koch, 1868	M	adult	species	preserved specimen	AP	2019	Žan Kuralt
BMKR01848	KROK54	Araneae	Amaurobius obustus L. Koch, 1868	M	adult	species	preserved specimen	AP	2019	Žan Kuralt
BMKR01849	KROK54	Araneae	Amaurobius obustus L. Koch, 1868	M	adult	species	preserved specimen	AP	2019	Žan Kuralt
BMKR01850	KROK54	Araneae	Amaurobius obustus L. Koch, 1868	M	adult	species	preserved specimen	AP	2019	Žan Kuralt
BMKR01851	KROK45	Araneae	Diplocephalus picinus (Blackwall, 1841)	M	adult	species	preserved specimen	AP	2019	Žan Kuralt
BMKR01852	KROK48	Araneae	Diplocephalus picinus (Blackwall, 1841)	M	adult	species	preserved specimen	AP	2019	Žan Kuralt	KROK072-19	MT994092
BMKR01853	KROK54	Araneae	Centrophantes roeweri (Wiehle, 1961)	F	adult	species	preserved specimen	AP	2019	Žan Kuralt
BMKR01854	KROK56	Araneae	Diplocephalus picinus (Blackwall, 1841)	M	adult	species	preserved specimen	AP	2019	Žan Kuralt
BMKR01855	KROK54	Araneae	Harpactea lepida (C. L. Koch, 1838)	M	adult	species	preserved specimen	AP	2019	Žan Kuralt
BMKR01856	KROK54	Araneae	Harpactea lepida (C. L. Koch, 1838)	M	adult	species	preserved specimen	AP	2019	Žan Kuralt
BMKR01857	KROK54	Araneae	Harpactea lepida (C. L. Koch, 1838)	M	adult	species	preserved specimen	AP	2019	Žan Kuralt
BMKR01858	KROK54	Araneae	Harpactea lepida (C. L. Koch, 1838)	M	adult	species	preserved specimen	AP	2019	Žan Kuralt
BMKR01859	KROK54	Araneae	Harpactea lepida (C. L. Koch, 1838)	M	adult	species	preserved specimen	AP	2019	Žan Kuralt
BMKR01860	KROK54	Araneae	Harpactea lepida (C. L. Koch, 1838)	M	adult	species	preserved specimen	AP	2019	Žan Kuralt
BMKR01861	KROK54	Araneae	Harpactea lepida (C. L. Koch, 1838)	F	adult	species	preserved specimen	AP	2019	Žan Kuralt
BMKR01862	KROK54	Araneae	Harpactea lepida (C. L. Koch, 1838)	F	adult	species	preserved specimen	AP	2019	Žan Kuralt
BMKR01863	KROK57	Araneae	Diplocephalus picinus (Blackwall, 1841)	M	adult	species	preserved specimen	AP	2019	Žan Kuralt
BMKR01864	KROK54	Araneae	Histopona luxurians (Kulczynski, 1897)	M	adult	species	preserved specimen	AP	2019	Žan Kuralt
BMKR01865	KROK54	Araneae	Histopona luxurians (Kulczynski, 1897)	M	adult	species	preserved specimen	AP	2019	Žan Kuralt
BMKR01866	KROK54	Araneae	Histopona luxurians (Kulczynski, 1897)	M	adult	species	preserved specimen	AP	2019	Žan Kuralt
BMKR01867	KROK54	Araneae	Histopona luxurians (Kulczynski, 1897)	M	adult	species	preserved specimen	AP	2019	Žan Kuralt
BMKR01868	KROK54	Araneae	Histopona luxurians (Kulczynski, 1897)	M	adult	species	preserved specimen	AP	2019	Žan Kuralt
BMKR01869	KROK54	Araneae	Histopona luxurians (Kulczynski, 1897)	M	adult	species	preserved specimen	AP	2019	Žan Kuralt
BMKR01870	KROK54	Araneae	Histopona luxurians (Kulczynski, 1897)	M	adult	species	preserved specimen	AP	2019	Žan Kuralt
BMKR01871	KROK54	Araneae	Histopona luxurians (Kulczynski, 1897)	F	adult	species	preserved specimen	AP	2019	Žan Kuralt
BMKR01872	KROK54	Araneae	Inermocoelotes inermis (L. Koch, 1855)	M	adult	species	preserved specimen	AP	2019	Žan Kuralt
BMKR01873	KROK54	Araneae	Inermocoelotes inermis (L. Koch, 1855)	M	adult	species	preserved specimen	AP	2019	Žan Kuralt
BMKR01874	KROK54	Araneae	Inermocoelotes inermis (L. Koch, 1855)	M	adult	species	preserved specimen	AP	2019	Žan Kuralt
BMKR01875	KROK54	Araneae	Inermocoelotes inermis (L. Koch, 1855)	M	adult	species	preserved specimen	AP	2019	Žan Kuralt
BMKR01876	KROK54	Araneae	Inermocoelotes inermis (L. Koch, 1855)	M	adult	species	preserved specimen	AP	2019	Žan Kuralt
BMKR01877	KROK54	Araneae	Inermocoelotes inermis (L. Koch, 1855)	M	adult	species	preserved specimen	AP	2019	Žan Kuralt
BMKR01878	KROK08	Araneae	Erigone autumnalis Emerton, 1882	M	adult	species	preserved specimen	AP	2019	Žan Kuralt	KROK073-19	MT994098
BMKR01879	KROK54	Araneae	Microneta viaria (Blackwall, 1841)	M	adult	species	preserved specimen	AP	2019	Žan Kuralt
BMKR01880	KROK54	Araneae	Tenuiphantes tenebricola (Wider, 1834)	F	adult	species	preserved specimen	AP	2019	Žan Kuralt
BMKR01881	KROK54	Lithobiomorpha	Lithobius tenebrosus Meinert, 1872	F	adult	species	preserved specimen	AP	2019	Ivan Kos
BMKR01882	KROK54	Lithobiomorpha	Lithobius tenebrosus Meinert, 1872	F	adult	species	preserved specimen	AP	2019	Ivan Kos
BMKR01883	KROK11	Araneae	Maso sundevalli (Westring, 1851)	F	adult	species	preserved specimen	AP	2019	Žan Kuralt	KROK074-19	MT994122
BMKR01884	KROK21	Araneae	Mermessus trilobatus (Emerton, 1882)	F	adult	species	preserved specimen	AP	2019	Žan Kuralt	KROK075-19	MT994123
BMKR01885	KROK14	Araneae	Micrargus herbigradus (Blackwall, 1854)	F	adult	species	preserved specimen	AP	2019	Žan Kuralt
BMKR01886	KROK55	Araneae	Harpactea lepida (C. L. Koch, 1838)	M	adult	species	preserved specimen	AP	2019	Žan Kuralt
BMKR01887	KROK55	Araneae	Histopona luxurians (Kulczynski, 1897)	M	adult	species	preserved specimen	AP	2019	Žan Kuralt
BMKR01888	KROK55	Araneae	Histopona luxurians (Kulczynski, 1897)	M	adult	species	preserved specimen	AP	2019	Žan Kuralt
BMKR01889	KROK55	Araneae	Histopona luxurians (Kulczynski, 1897)	M	adult	species	preserved specimen	AP	2019	Žan Kuralt
BMKR01890	KROK55	Araneae	Histopona luxurians (Kulczynski, 1897)	M	adult	species	preserved specimen	AP	2019	Žan Kuralt
BMKR01891	KROK55	Araneae	Histopona luxurians (Kulczynski, 1897)	M	adult	species	preserved specimen	AP	2019	Žan Kuralt
BMKR01892	KROK55	Araneae	Histopona luxurians (Kulczynski, 1897)	M	adult	species	preserved specimen	AP	2019	Žan Kuralt
BMKR01893	KROK55	Araneae	Histopona luxurians (Kulczynski, 1897)	M	adult	species	preserved specimen	AP	2019	Žan Kuralt
BMKR01894	KROK55	Araneae	Histopona luxurians (Kulczynski, 1897)	M	adult	species	preserved specimen	AP	2019	Žan Kuralt
BMKR01895	KROK55	Araneae	Inermocoelotes inermis (L. Koch, 1855)	M	adult	species	preserved specimen	AP	2019	Žan Kuralt
BMKR01896	KROK55	Araneae	Microneta viaria (Blackwall, 1841)	M	adult	species	preserved specimen	AP	2019	Žan Kuralt
BMKR01897	KROK55	Araneae	Pardosa alacris C.L. Koch, 1833	F	adult	species	preserved specimen	AP	2019	Žan Kuralt
BMKR01898	KROK55	Araneae	Pardosa alacris C.L. Koch, 1833	M	adult	species	preserved specimen	AP	2019	Žan Kuralt
BMKR01899	KROK55	Araneae	Pardosa alacris C.L. Koch, 1833	M	adult	species	preserved specimen	AP	2019	Žan Kuralt
BMKR01900	KROK55	Araneae	Pardosa alacris C.L. Koch, 1833	M	adult	species	preserved specimen	AP	2019	Žan Kuralt
BMKR01901	KROK55	Araneae	Tenuiphantes tenebricola (Wider, 1834)	F	adult	species	preserved specimen	AP	2019	Žan Kuralt
BMKR01902	KROK55	Araneae	Tenuiphantes tenebricola (Wider, 1834)	F	adult	species	preserved specimen	AP	2019	Žan Kuralt
BMKR01903	KROK55	Araneae	Tenuiphantes tenebricola (Wider, 1834)	M	adult	species	preserved specimen	AP	2019	Žan Kuralt
BMKR01904	KROK16	Araneae	Micrargus herbigradus (Blackwall, 1854)	F	adult	species	preserved specimen	AP	2019	Žan Kuralt
BMKR01905	KROK18	Araneae	Micrargus herbigradus (Blackwall, 1854)	F	adult	species	preserved specimen	AP	2019	Žan Kuralt
BMKR01906	KROK55	Lithobiomorpha	Eupolybothrus tridentinus (Fanzago, 1874)	F	adult	species	preserved specimen	AP	2019	Ivan Kos
BMKR01907	KROK55	Lithobiomorpha	Eupolybothrus tridentinus (Fanzago, 1874)	M	adult	species	preserved specimen	AP	2019	Ivan Kos
BMKR01908	KROK55	Lithobiomorpha	Lithobius latro Meinert, 1872	F	adult	species	preserved specimen	AP	2019	Ivan Kos
BMKR01909	KROK55	Lithobiomorpha	Lithobius pygmaeus Latzel, 1880	F	adult	species	preserved specimen	AP	2019	Ivan Kos
BMKR01910	KROK18	Araneae	Micrargus herbigradus (Blackwall, 1854)	F	adult	species	preserved specimen	AP	2019	Žan Kuralt
BMKR01911	KROK47	Araneae	Microneta viaria (Blackwall, 1841)	M	adult	species	preserved specimen	AP	2019	Žan Kuralt
BMKR01912	KROK56	Araneae	Harpactea lepida (C. L. Koch, 1838)	M	adult	species	preserved specimen	AP	2019	Žan Kuralt
BMKR01913	KROK56	Araneae	Harpactea lepida (C. L. Koch, 1838)	M	adult	species	preserved specimen	AP	2019	Žan Kuralt
BMKR01914	KROK56	Araneae	Harpactea lepida (C. L. Koch, 1838)	M	adult	species	preserved specimen	AP	2019	Žan Kuralt
BMKR01915	KROK56	Araneae	Harpactea lepida (C. L. Koch, 1838)	M	adult	species	preserved specimen	AP	2019	Žan Kuralt
BMKR01916	KROK56	Araneae	Histopona luxurians (Kulczynski, 1897)	M	adult	species	preserved specimen	AP	2019	Žan Kuralt
BMKR01917	KROK56	Araneae	Histopona luxurians (Kulczynski, 1897)	M	adult	species	preserved specimen	AP	2019	Žan Kuralt
BMKR01918	KROK56	Araneae	Histopona luxurians (Kulczynski, 1897)	M	adult	species	preserved specimen	AP	2019	Žan Kuralt
BMKR01919	KROK56	Araneae	Histopona luxurians (Kulczynski, 1897)	M	adult	species	preserved specimen	AP	2019	Žan Kuralt
BMKR01920	KROK56	Araneae	Histopona luxurians (Kulczynski, 1897)	M	adult	species	preserved specimen	AP	2019	Žan Kuralt
BMKR01921	KROK56	Araneae	Histopona luxurians (Kulczynski, 1897)	M	adult	species	preserved specimen	AP	2019	Žan Kuralt
BMKR01922	KROK56	Araneae	Histopona luxurians (Kulczynski, 1897)	M	adult	species	preserved specimen	AP	2019	Žan Kuralt
BMKR01923	KROK56	Araneae	Histopona luxurians (Kulczynski, 1897)	M	adult	species	preserved specimen	AP	2019	Žan Kuralt
BMKR01924	KROK56	Araneae	Histopona luxurians (Kulczynski, 1897)	M	adult	species	preserved specimen	AP	2019	Žan Kuralt
BMKR01925	KROK47	Araneae	Microneta viaria (Blackwall, 1841)	F	adult	species	preserved specimen	AP	2019	Žan Kuralt	KROK077-19	MT994124
BMKR01926	KROK56	Araneae	Inermocoelotes inermis (L. Koch, 1855)	M	adult	species	preserved specimen	AP	2019	Žan Kuralt
BMKR01927	KROK56	Araneae	Inermocoelotes inermis (L. Koch, 1855)	M	adult	species	preserved specimen	AP	2019	Žan Kuralt
BMKR01928	KROK58	Araneae	Microneta viaria (Blackwall, 1841)	F	adult	species	preserved specimen	AP	2019	Žan Kuralt
BMKR01929	KROK56	Araneae	Pardosa alacris C.L. Koch, 1833	M	adult	species	preserved specimen	AP	2019	Žan Kuralt
BMKR01930	KROK58	Araneae	Microneta viaria (Blackwall, 1841)	M	adult	species	preserved specimen	AP	2019	Žan Kuralt
BMKR01931	KROK48	Araneae	Microneta viaria (Blackwall, 1841)	F	adult	species	preserved specimen	AP	2019	Žan Kuralt	KROK145-20	OL874967
BMKR01932	KROK56	Araneae	Tenuiphantes tenebricola (Wider, 1834)	M	adult	species	preserved specimen	AP	2019	Žan Kuralt
BMKR01933	KROK56	Araneae	Tenuiphantes tenebricola (Wider, 1834)	M	adult	species	preserved specimen	AP	2019	Žan Kuralt
BMKR01934	KROK56	Araneae	Tenuiphantes tenebricola (Wider, 1834)	M	adult	species	preserved specimen	AP	2019	Žan Kuralt
BMKR01935	KROK48	Araneae	Microneta viaria (Blackwall, 1841)	M	adult	species	preserved specimen	AP	2019	Žan Kuralt
BMKR01936	KROK04	Araneae	Scotargus pilosus Simon, 1913	M	adult	species	preserved specimen	AP	2019	Žan Kuralt	KROK078-19	MT994139
BMKR01937	KROK14	Araneae	Scotargus pilosus Simon, 1913	F	adult	species	preserved specimen	AP	2019	Žan Kuralt	KROK146-20	OL874977
BMKR01938	KROK43	Araneae	Tenuiphantes flavipes (Blackwall, 1854)	M	adult	species	preserved specimen	AP	2019	Žan Kuralt
BMKR01939	KROK43	Araneae	Tenuiphantes flavipes (Blackwall, 1854)	M	adult	species	preserved specimen	AP	2019	Žan Kuralt	KROK079-19	MT994147
BMKR01940	KROK43	Araneae	Tenuiphantes flavipes (Blackwall, 1854)	F	adult	species	preserved specimen	AP	2019	Žan Kuralt
BMKR01941	KROK57	Coleoptera	Abax ovalis (Duftschmid, 1812)	F	adult	species	preserved specimen	AP	2019	Urška Ratajc
BMKR01942	KROK57	Coleoptera	Aptinus bombarda (Illiger, 1800)	M	adult	species	preserved specimen	AP	2019	Urška Ratajc
BMKR01943	KROK57	Coleoptera	Aptinus bombarda (Illiger, 1800)	M	adult	species	preserved specimen	AP	2019	Urška Ratajc
BMKR01944	KROK57	Coleoptera	Cychrus attenuatus (Fabricius, 1792)	F	adult	species	preserved specimen	AP	2019	Urška Ratajc
BMKR01945	KROK57	Coleoptera	Cychrus attenuatus (Fabricius, 1792)	F	adult	species	preserved specimen	AP	2019	Urška Ratajc
BMKR01946	KROK56	Lithobiomorpha	Eupolybothrus tridentinus (Fanzago, 1874)	F	adult	species	preserved specimen	AP	2019	Ivan Kos
BMKR01947	KROK56	Lithobiomorpha	Eupolybothrus tridentinus (Fanzago, 1874)	M	adult	species	preserved specimen	AP	2019	Ivan Kos
BMKR01948	KROK57	Coleoptera	Pterostichus burmeisteri Heer, 1837	M	adult	species	preserved specimen	AP	2019	Urška Ratajc
BMKR01949	KROK57	Coleoptera	Pterostichus burmeisteri Heer, 1837	M	adult	species	preserved specimen	AP	2019	Urška Ratajc
BMKR01950	KROK57	Araneae	Diplocephalus picinus (Blackwall, 1841)	M	adult	species	preserved specimen	AP	2019	Žan Kuralt
BMKR01951	KROK48	Araneae	Tenuiphantes flavipes (Blackwall, 1854)	M	adult	species	preserved specimen	AP	2019	Žan Kuralt
BMKR01952	KROK57	Araneae	Harpactea lepida (C. L. Koch, 1838)	M	adult	species	preserved specimen	AP	2019	Žan Kuralt
BMKR01953	KROK57	Araneae	Harpactea lepida (C. L. Koch, 1838)	M	adult	species	preserved specimen	AP	2019	Žan Kuralt
BMKR01954	KROK57	Araneae	Harpactea lepida (C. L. Koch, 1838)	M	adult	species	preserved specimen	AP	2019	Žan Kuralt
BMKR01955	KROK57	Araneae	Harpactea lepida (C. L. Koch, 1838)	M	adult	species	preserved specimen	AP	2019	Žan Kuralt
BMKR01956	KROK57	Araneae	Harpactea lepida (C. L. Koch, 1838)	M	adult	species	preserved specimen	AP	2019	Žan Kuralt
BMKR01957	KROK57	Araneae	Histopona luxurians (Kulczynski, 1897)	M	adult	species	preserved specimen	AP	2019	Žan Kuralt
BMKR01958	KROK57	Araneae	Histopona luxurians (Kulczynski, 1897)	M	adult	species	preserved specimen	AP	2019	Žan Kuralt
BMKR01959	KROK57	Araneae	Histopona luxurians (Kulczynski, 1897)	M	adult	species	preserved specimen	AP	2019	Žan Kuralt
BMKR01960	KROK57	Araneae	Histopona luxurians (Kulczynski, 1897)	M	adult	species	preserved specimen	AP	2019	Žan Kuralt
BMKR01961	KROK57	Araneae	Histopona luxurians (Kulczynski, 1897)	F	adult	species	preserved specimen	AP	2019	Žan Kuralt
BMKR01962	KROK57	Araneae	Inermocoelotes inermis (L. Koch, 1855)	M	adult	species	preserved specimen	AP	2019	Žan Kuralt
BMKR01963	KROK57	Araneae	Inermocoelotes inermis (L. Koch, 1855)	M	adult	species	preserved specimen	AP	2019	Žan Kuralt
BMKR01964	KROK57	Araneae	Inermocoelotes inermis (L. Koch, 1855)	M	adult	species	preserved specimen	AP	2019	Žan Kuralt
BMKR01965	KROK36	Araneae	Centrophantes roeweri (Wiehle, 1961)	F	adult	species	preserved specimen	AP	2019	Žan Kuralt	KROK080-19	MT994146
BMKR01966	KROK57	Araneae	Microneta viaria (Blackwall, 1841)	F	adult	species	preserved specimen	AP	2019	Žan Kuralt
BMKR01967	KROK57	Araneae	Microneta viaria (Blackwall, 1841)	F	adult	species	preserved specimen	AP	2019	Žan Kuralt
BMKR01968	KROK57	Araneae	Microneta viaria (Blackwall, 1841)	F	adult	species	preserved specimen	AP	2019	Žan Kuralt
BMKR01969	KROK57	Araneae	Microneta viaria (Blackwall, 1841)	M	adult	species	preserved specimen	AP	2019	Žan Kuralt
BMKR01970	KROK57	Araneae	Pardosa alacris C.L. Koch, 1833	M	adult	species	preserved specimen	AP	2019	Žan Kuralt
BMKR01971	KROK57	Araneae	Pardosa alacris C.L. Koch, 1833	M	adult	species	preserved specimen	AP	2019	Žan Kuralt
BMKR01972	KROK57	Araneae	Pardosa alacris C.L. Koch, 1833	F	adult	species	preserved specimen	AP	2019	Žan Kuralt
BMKR01973	KROK57	Araneae	Tenuiphantes tenebricola (Wider, 1834)	F	adult	species	preserved specimen	AP	2019	Žan Kuralt
BMKR01974	KROK21	Araneae	Tenuiphantes flavipes (Blackwall, 1854)	F	adult	species	preserved specimen	AP	2019	Žan Kuralt	KROK147-20	OL874982
BMKR01975	KROK58	Coleoptera	Abax carinatus (Duftschmid, 1812)	M	adult	species	preserved specimen	AP	2019	Urška Ratajc
BMKR01976	KROK58	Coleoptera	Abax ovalis (Duftschmid, 1812)	M	adult	species	preserved specimen	AP	2019	Urška Ratajc
BMKR01977	KROK58	Coleoptera	Abax ovalis (Duftschmid, 1812)	F	adult	species	preserved specimen	AP	2019	Urška Ratajc
BMKR01978	KROK58	Coleoptera	Abax parallelepipedus (Piller and Mitterpacher, 1783)	M	adult	species	preserved specimen	AP	2019	Urška Ratajc
BMKR01979	KROK58	Coleoptera	Aptinus bombarda (Illiger, 1800)			species	preserved specimen	AP	2019	Urška Ratajc
BMKR01980	KROK58	Coleoptera	Aptinus bombarda (Illiger, 1800)			species	preserved specimen	AP	2019	Urška Ratajc
BMKR01981	KROK58	Coleoptera	Aptinus bombarda (Illiger, 1800)			species	preserved specimen	AP	2019	Urška Ratajc
BMKR01982	KROK58	Coleoptera	Cychrus attenuatus (Fabricius, 1792)			species	preserved specimen	AP	2019	Urška Ratajc
BMKR01983	KROK58	Coleoptera	Cychrus attenuatus (Fabricius, 1792)			species	preserved specimen	AP	2019	Urška Ratajc
BMKR01984	KROK58	Coleoptera	Dima elateroides Charpentier, 1825			species	preserved specimen	AP	2019	Urška Ratajc
BMKR01985	KROK58	Coleoptera	Pterostichus burmeisteri Heer, 1837	M	adult	species	preserved specimen	AP	2019	Urška Ratajc
BMKR01986	KROK58	Coleoptera	Pterostichus burmeisteri Heer, 1837	M	adult	species	preserved specimen	AP	2019	Urška Ratajc
BMKR01987	KROK58	Araneae	Harpactea lepida (C. L. Koch, 1838)	M	adult	species	preserved specimen	AP	2019	Žan Kuralt
BMKR01988	KROK58	Araneae	Harpactea lepida (C. L. Koch, 1838)	M	adult	species	preserved specimen	AP	2019	Žan Kuralt
BMKR01989	KROK58	Araneae	Harpactea lepida (C. L. Koch, 1838)	M	adult	species	preserved specimen	AP	2019	Žan Kuralt
BMKR01990	KROK58	Araneae	Harpactea lepida (C. L. Koch, 1838)	M	adult	species	preserved specimen	AP	2019	Žan Kuralt
BMKR01991	KROK58	Araneae	Harpactea lepida (C. L. Koch, 1838)	M	adult	species	preserved specimen	AP	2019	Žan Kuralt
BMKR01992	KROK58	Araneae	Harpactea lepida (C. L. Koch, 1838)	F	adult	species	preserved specimen	AP	2019	Žan Kuralt
BMKR01993	KROK58	Araneae	Tenuiphantes flavipes (Blackwall, 1854)	M	adult	species	preserved specimen	AP	2019	Žan Kuralt
BMKR01994	KROK47	Araneae	Tenuiphantes mengei (Kulczynski, 1887)	F	adult	species	preserved specimen	AP	2019	Žan Kuralt
BMKR01995	KROK58	Araneae	Histopona luxurians (Kulczynski, 1897)	M	adult	species	preserved specimen	AP	2019	Žan Kuralt
BMKR01996	KROK58	Araneae	Histopona luxurians (Kulczynski, 1897)	M	adult	species	preserved specimen	AP	2019	Žan Kuralt
BMKR01997	KROK58	Araneae	Histopona luxurians (Kulczynski, 1897)	M	adult	species	preserved specimen	AP	2019	Žan Kuralt
BMKR01998	KROK58	Araneae	Histopona luxurians (Kulczynski, 1897)	M	adult	species	preserved specimen	AP	2019	Žan Kuralt
BMKR01999	KROK58	Araneae	Histopona luxurians (Kulczynski, 1897)	M	adult	species	preserved specimen	AP	2019	Žan Kuralt
[truncated: 337 more rows]
